# Supplementary material for: Identification, characterization and molecular adaptation of class I redox systems for the production of hydroxylated diterpenoids
Source: PubMed Central journal article supplement (PMC4877809; doi:10.1186/s12934-016-0487-6), 2016-05-23
Supplement: 12934_2016_487_MOESM1_ESM.pdf [file 12934_2016_487_MOESM1_ESM.pdf]

# Supporting Information

## Identification, characterization and molecular adaptation of class I redox systems for the production of multi-functionalized diterpenoids

**Christian Görner<sup>a, ‡</sup>, Patrick Schrepfer<sup>a, ‡</sup>, Veronika Redai<sup>a</sup>, Frank Wallrapp<sup>b</sup>, Bernhard Loll<sup>c</sup>, Wolfgang Eisenreich<sup>e</sup>, Martin Haslbeck<sup>f</sup> and Thomas Brück<sup>a, \*</sup>**

<sup>a</sup>Division of Industrial Biocatalysis, Technical University of Munich, Lichtenberg Str. 4, 85748 Garching, Germany

<sup>b</sup>Chair of Bioinformatics, Technical University of Munich, Boltzmannstraße 3, 85748 Garching, Germany

<sup>c</sup>Institute for Chemistry and Biochemistry, Division of Structural Biology, Freie Universität Berlin, Takustr. 6, 14195 Berlin, Germany

<sup>d</sup>Chair of Biochemistry, Technical University of Munich, Lichtenberg Str. 4, 85748 Garching

<sup>e</sup>Chair of Biotechnology, Technical University of Munich, Lichtenbergstr. 4, 85748 Garching, Germany

*‡These authors contributed equally.*

\* To whom correspondence should be addressed:

Thomas Brück

Fachgebiet für Industrielle Biokatalyse

Zentrum für Weiße Biotechnologie

Department für Chemie

Technische Universität München

Lichtenberg Str. 4, 85748 Garching, Germany

E-mail: [brueck@tum.de](mailto:brueck@tum.de)

# Content

|                                                                                                                                                                                                                                                                                                                                                                                                                                         |    |
|-----------------------------------------------------------------------------------------------------------------------------------------------------------------------------------------------------------------------------------------------------------------------------------------------------------------------------------------------------------------------------------------------------------------------------------------|----|
| 1. <i>In vivo</i> assay .....                                                                                                                                                                                                                                                                                                                                                                                                           | 7  |
| <b>Figure S1a.</b> <i>In vivo</i> assay for the conversion of cyclooctat-9-en-7-ol by CotB3 to cyclooctat-9-en-5,7-diol using different redox system variants. The data is illustrated as boxplot diagram (25 % to 75 % with whiskers with maximum 1.5 IQR) from five whole cell hydroxylation experiments. 100 % yield correspond to the median of the CotB3/AfR/Afx control .....                                                     | 7  |
| <b>Figure S1b.</b> <i>In vivo</i> assay for the conversion of cyclooctat-9-en-5,7-diol by CotB4 to cyclooctatin using different redox system variants. The data is illustrated as boxplot diagram (25 % to 75 % with whiskers with maximum 1.5 IQR) from five whole cell hydroxylation experiments. 100 % yield correspond to the median of the CotB3/AfR/Afx control .....                                                             | 7  |
| <b>Figure S1c.</b> SDS Page of the whole cell proteome from the <i>in vivo</i> assay (24 hours). The catalytic efficiency of CotB3 was evaluated using different redox system variants. ....                                                                                                                                                                                                                                            | 8  |
| <b>Table S1.</b> Description of Figure S1c.....                                                                                                                                                                                                                                                                                                                                                                                         | 8  |
| <b>Figure S1d.</b> SDS Page of the whole cell proteome from the <i>in vivo</i> assay (24 hours). The catalytic efficiency of CotB4 was evaluated using different redox system variants. ....                                                                                                                                                                                                                                            | 9  |
| <b>Table S2.</b> Description of Figure S1d .....                                                                                                                                                                                                                                                                                                                                                                                        | 9  |
| 2. Bioinformatics .....                                                                                                                                                                                                                                                                                                                                                                                                                 | 10 |
| <b>Figure S2a.</b> Model of CotB3 harboring cyclooct-9-en-7-ol. Modelled CotB3 (gray), prosthetic heme group (magenta) and cyclooct-9-en-7-ol (blue).....                                                                                                                                                                                                                                                                               | 10 |
| <b>Figure S2b.</b> Structural alignment of CotB3 (cyan) and P450cam (PDB-ID: 4JX1, red). The alignment has an RMSD of 0.142Å over 313 aligned residues with 19% sequence identity. Note that the RMSD value considers only atoms that are present in both structures. Not matching loops in CotB3 are not incorporated into the alignment. The interaction region of CotB3 with Afx/Pdx is part of the matched helical structures. .... | 11 |
| <b>Figure S2c.</b> Model of CotB4 harboring cyclooct-9-en-5,7-diol. Modelled CotB4 (gray), prosthetic heme group (magenta) and cyclooct-9-en-5,7-diol (blue). ....                                                                                                                                                                                                                                                                      | 12 |
| <b>Fig S2d.</b> Structural alignment of CotB4 (cyan) and P450cam (PDB-ID: 4JX1, red). The alignment has an RMSD of 0.144Å over 339 aligned residues with 18% sequence identity. Note that the RMSD value considers only atoms that are present in both structures. Not matching loops in CotB4 are not incorporated into the alignment. The interaction region of CotB4 with Afx/Pdx is part of the matched helical structures. ....    | 13 |
| <b>Figure S2e.</b> Modelled AfR•Afx complex with AfR harboring FAD (Flavin-Adenine-Dinucleotide) and Afx harboring inorganic Fe <sub>2</sub> /S <sub>2</sub> -cluster. AfR•Afx complex (dark blue/gray). AfR with bound prosthetic FAD (magenta) and Afx bound to inorganic Fe <sub>2</sub> /S <sub>2</sub> -cluster (light blue). W297 of AfR proposed to be acting in electron transfer is shown in red.....                          | 14 |
| <b>Figure S2f.</b> Modelled CotB3•Afx complex harboring cyclooct-9-en-7-ol. CotB3•Afx complex (dark blue/orange). CotB3 contains prosthetic heme group (magenta) and cyclooct-9-en-7-ol (light blue). Afx bound to inorganic Fe <sub>2</sub> /S <sub>2</sub> -cluster (green/magenta).....                                                                                                                                              | 15 |
| <b>Figure S2g.</b> Modelled CotB4•Afx complex harboring cyclooct-9-en-7-ol. CotB4•Afx complex (dark blue/orange). CotB4 contains prosthetic heme group (magenta) and cyclooct-9-en-5,7-diol (light blue). Afx contains inorganic Fe <sub>2</sub> /S <sub>2</sub> -cluster (green/magenta).....                                                                                                                                          | 16 |

|                                                                                                                                                                                                                                                                                                                                                                                                                                                                                                                                                                                                                                                                                                                                                                                                                                                       |    |
|-------------------------------------------------------------------------------------------------------------------------------------------------------------------------------------------------------------------------------------------------------------------------------------------------------------------------------------------------------------------------------------------------------------------------------------------------------------------------------------------------------------------------------------------------------------------------------------------------------------------------------------------------------------------------------------------------------------------------------------------------------------------------------------------------------------------------------------------------------|----|
| <b>Figure S2h.</b> Inner view of the Cotb3•Pdx complex (dark blue•red). Pdx contains inorganic Fe <sub>2</sub> /S <sub>2</sub> -cluster (green/magenta). CotB3 contains prosthetic heme group (gray) and cyclooct-9-en-7-ol (red). Essential hydrogen bonds for the interaction of Pdx and CotB3 to facilitate binding and electron transport are highlighted in black. Hydrogen bond formation between CotB3 <sub>R110</sub> and CotB3 <sub>R114</sub> with Pdx <sub>W106</sub> needed for efficient binding and electron transfer, is strongly impaired due to the chemical nature of participating amino acids. The Cotb4•Pdx complex exhibits the same structure and also the same interacting residues. ....                                                                                                                                     | 17 |
| <b>Figure S2i.</b> Inner view of the Cotb4•Afx complex (dark blue•red). Afx contains inorganic Fe <sub>2</sub> /S <sub>2</sub> -cluster (green/magenta). CotB4 contains prosthetic heme group (gray) and cyclooct-9-en-5,7-diol (red). Essential hydrogen bonds for the interaction of Afx and CotB4 to facilitate binding and electron transport are highlighted in black. ....                                                                                                                                                                                                                                                                                                                                                                                                                                                                      | 18 |
| <b>Figure S2j.</b> Structural superposition of the PdR•Pdx (red•blue) with the modelled AfR•Afx complex (ocher•gray). Prosthetic FAD group of PdR and modelled AfR are shown in light blue. 2Fe-2S cluster of Pdx and modelled Afx are shown in magenta/green. The important hydrogen bridge (black) between Pdx <sub>D38</sub> and PdR <sub>R310</sub> needed for binding as well as PdR <sub>W330</sub> facilitating electron transport are shown. Differing position of PdR <sub>W330</sub> corresponding to W297 in AfR, presumably acting in electron transfer from FAD to Pdx is shown in ocher. Analogous interactions facilitating binding of AfR to Afx could not be deciphered. Substitution of Pdx <sub>D38</sub> to E38 is suggested to impair electron transport by an alternate binding mode of Pdx <sub>D38E</sub> to native PdR. .... | 19 |
| <b>Figure S2k.</b> Modelled CotB3 harboring (-)-casbene. CotB3 (light purple) contains prosthetic heme group (blue) and docked (-)-casbene (gray). The heme group contains the iron cation (magenta) and the dative bond to cysteine 408 (green) of the CotB3. (-)-Casbene is shown in the conformation comprising the lowest binding energy derived by cluster analysis of AutodockVina. Hydroxylated C-10 of (-)-casbene is shown in blue.....                                                                                                                                                                                                                                                                                                                                                                                                      | 20 |
| <b>Figure S2l.</b> Modelled CotB3 harboring sinularcasbene D. CotB3 (light purple) contains prosthetic heme group (blue) and docked sinularcasbene D (gray). The heme group contains the iron cation (magenta) and the dative bond to cysteine 408 (green) of the CotB3. Sinularcasbene D is shown in the conformation comprising the lowest binding energy derived by cluster analysis of AutodockVina.....                                                                                                                                                                                                                                                                                                                                                                                                                                          | 21 |
| <b>Table S3.</b> PROCHECK results of CotB3/4, AfR and Afx. ....                                                                                                                                                                                                                                                                                                                                                                                                                                                                                                                                                                                                                                                                                                                                                                                       | 22 |
| QMEAN Z-scores .....                                                                                                                                                                                                                                                                                                                                                                                                                                                                                                                                                                                                                                                                                                                                                                                                                                  | 22 |
| <b>Figure S2m.</b> QMEAN Z-score of the AfR model (-0.31).....                                                                                                                                                                                                                                                                                                                                                                                                                                                                                                                                                                                                                                                                                                                                                                                        | 22 |
| <b>Figure S2n.</b> QMEAN Z-score of the Afx model (-0.10) .....                                                                                                                                                                                                                                                                                                                                                                                                                                                                                                                                                                                                                                                                                                                                                                                       | 23 |
| <b>Figure S2o.</b> QMEAN Z-score of the CotB3 model (-1.15).....                                                                                                                                                                                                                                                                                                                                                                                                                                                                                                                                                                                                                                                                                                                                                                                      | 23 |
| <b>Figure S2p.</b> QMEAN Z-score of the CotB4 model (-1.33).....                                                                                                                                                                                                                                                                                                                                                                                                                                                                                                                                                                                                                                                                                                                                                                                      | 24 |
| 3. NMR-Spectroscopy .....                                                                                                                                                                                                                                                                                                                                                                                                                                                                                                                                                                                                                                                                                                                                                                                                                             | 25 |
| <b>Figure S3a.</b> <sup>1</sup> H NMR (500 MHz, CDCl <sub>3</sub> ) of cyclooctat-9-en-7-ol .....                                                                                                                                                                                                                                                                                                                                                                                                                                                                                                                                                                                                                                                                                                                                                     | 25 |
| <b>Figure S3b.</b> <sup>13</sup> C NMR (125 MHz, CDCl <sub>3</sub> ) of cyclooctat-9-en-7-ol .....                                                                                                                                                                                                                                                                                                                                                                                                                                                                                                                                                                                                                                                                                                                                                    | 26 |
| <b>Figure S3c.</b> <sup>1</sup> H NMR (500 MHz, CDCl <sub>3</sub> ) of cyclooctat-9-en-5,7-diol.....                                                                                                                                                                                                                                                                                                                                                                                                                                                                                                                                                                                                                                                                                                                                                  | 27 |
| <b>Figure S3d.</b> <sup>13</sup> C NMR (125 MHz, CDCl <sub>3</sub> ) of cyclooctat-9-en-5,7-diol .....                                                                                                                                                                                                                                                                                                                                                                                                                                                                                                                                                                                                                                                                                                                                                | 28 |
| <b>Figure S3e.</b> <sup>1</sup> H NMR (500 MHz, CD <sub>3</sub> -OD) of cyclooctatin .....                                                                                                                                                                                                                                                                                                                                                                                                                                                                                                                                                                                                                                                                                                                                                            | 29 |

|                                                                                                                                                                                                                                               |    |
|-----------------------------------------------------------------------------------------------------------------------------------------------------------------------------------------------------------------------------------------------|----|
| <b>Figure S3f.</b> $^{13}\text{C}$ NMR (125 MHz, $\text{CD}_3\text{-OD}$ ) of cyclooctatin .....                                                                                                                                              | 30 |
| <b>Figure S3g.</b> COSY (500 MHz, $\text{CD}_3\text{-OD}$ ) NMR of cyclooctatin .....                                                                                                                                                         | 31 |
| <b>Figure S3h.</b> HSQC (500 MHz, $\text{CD}_3\text{-OD}$ ) NMR of cyclooctatin.....                                                                                                                                                          | 32 |
| <b>Figure S3i.</b> NOESY NMR (500 MHz, $\text{CD}_3\text{-OD}$ ) of cyclooctatin .....                                                                                                                                                        | 33 |
| <b>Figure S3j.</b> $^1\text{H}$ NMR (500 MHz, $\text{CDCl}_3$ ) of the C-5 R-MTPA derivative of cyclooctat-9-en-5,7-diol. 34                                                                                                                  |    |
| <b>Figure S3k.</b> $^{13}\text{C}$ NMR (125 MHz, $\text{CDCl}_3$ ) of the C-5 R-MTPA derivative of cyclooctat-9-en-5,7-diol .....                                                                                                             | 35 |
| <b>Figure S3l.</b> COSY NMR (500 MHz, $\text{CDCl}_3$ ) of the C-5 R-MTPA derivative of cyclooctat-9-en-5,7-diol .....                                                                                                                        | 36 |
| <b>Figure S3m.</b> HSQC NMR (500 MHz, $\text{CDCl}_3$ ) of the C-5 R-MTPA derivative of cyclooctat-9-en-5,7-diol .....                                                                                                                        | 37 |
| <b>Figure S3n.</b> NOESY NMR (500 MHz, $\text{CDCl}_3$ ) of the C-5 R-MTPA derivative of cyclooctat-9-en-5,7-diol .....                                                                                                                       | 38 |
| <b>Figure S3o.</b> $^1\text{H}$ NMR (500 MHz, $\text{CDCl}_3$ ) of the C-5 S-MTPA derivative of cyclooctat-9-en-5,7-diol .....                                                                                                                | 39 |
| <b>Figure S3p.</b> $^{13}\text{C}$ NMR (125 MHz, $\text{CDCl}_3$ ) of the C-5 S-MTPA derivative of cyclooctat-9-en-5,7-diol .....                                                                                                             | 40 |
| <b>Figure S3q.</b> COSY NMR (500 MHz, $\text{CDCl}_3$ ) of the C-5 S-MTPA derivative of cyclooctat-9-en-5,7-diol .....                                                                                                                        | 41 |
| <b>Figure S3r.</b> HSQC NMR (500 MHz, $\text{CDCl}_3$ ) of the C-5 S-MTPA derivative of cyclooctat-9-en-5,7-diol .....                                                                                                                        | 42 |
| <b>Figure S3s.</b> NOESY NMR (500 MHz, $\text{CDCl}_3$ ) of the C-5 S-MTPA derivative of cyclooctat-9-en-5,7-diol .....                                                                                                                       | 43 |
| Chiral derivatizing and analysis.....                                                                                                                                                                                                         | 44 |
| <b>Figure S3t.</b> $^1\text{H}$ NMR (500 MHz, $\text{CDCl}_3$ ) Overlay of the C-5 R/S-MTPA derivatives of cyclooctat-9-en-5,7-diol.....                                                                                                      | 44 |
| <b>Table S4.</b> Experimental $^1\text{H}$ ( $\text{CDCl}_3$ , 500 MHz, $\delta_{\text{H}}$ ) and $^{13}\text{C}$ ( $\text{CDCl}_3$ , 125 MHz, $\delta_{\text{C}}$ ) NMR data of the C-5 R-MTPA derivatives of cyclooctat-9-en-5,7-diol ..... | 45 |
| <b>Table S5.</b> Experimental $^1\text{H}$ ( $\text{CDCl}_3$ , 500 MHz, $\delta_{\text{H}}$ ) and $^{13}\text{C}$ ( $\text{CDCl}_3$ , 125 MHz, $\delta_{\text{C}}$ ) NMR data of the C-5 S-MTPA derivatives of cyclooctat-9-en-5,7-diol.....  | 46 |
| <b>Figure S4.</b> $\Delta\delta$ (S – R) values (ppm) for the C-5 MTPA derivatives of cyclooctat-9-en-5,7-diol .....                                                                                                                          | 47 |
| <b>Figure S5a.</b> $^1\text{H}$ NMR (500 MHz, $\text{CDCl}_3$ ) of (-)-Casbene .....                                                                                                                                                          | 48 |
| <b>Figure S5b.</b> $^{13}\text{C}$ NMR (125 MHz, $\text{CDCl}_3$ ) of (-)-Casbene .....                                                                                                                                                       | 49 |
| <b>Table S6.</b> Experimental $^1\text{H}$ ( $\text{CDCl}_3$ , 500 MHz, $\delta_{\text{H}}$ , $J$ in Hz) and $^{13}\text{C}$ ( $\text{CDCl}_3$ , 125 MHz, $\delta_{\text{C}}$ ) NMR data of sinularcasbane D.....                             | 50 |
| <b>Figure S6.</b> COSY and HMBC correlations of sinularcasbane D.....                                                                                                                                                                         | 51 |
| <b>Figure S7.</b> Illustrated NOESY correlations of sinularcasbane D. Modelling was done using molecular mechanics (MM2) calculations with ChemDraw Ultra Ver. 13.0 (CambridgeSoft). ....                                                     | 51 |
| <b>Figure S8a.</b> $^1\text{H}$ NMR (500 MHz, $\text{CDCl}_3$ ) of sinularcasbane D.....                                                                                                                                                      | 52 |

|    |                                                                                                                                                                                                                                                                                                                                                                                                                                                                             |    |
|----|-----------------------------------------------------------------------------------------------------------------------------------------------------------------------------------------------------------------------------------------------------------------------------------------------------------------------------------------------------------------------------------------------------------------------------------------------------------------------------|----|
|    | <b>Figure S8b.</b> <sup>1</sup> H NMR (500 MHz, CDCl <sub>3</sub> ) of sinularcasbane D .....                                                                                                                                                                                                                                                                                                                                                                               | 53 |
|    | <b>Figure S8c.</b> <sup>13</sup> C NMR (125 MHz, CDCl <sub>3</sub> ) of sinularcasbane D .....                                                                                                                                                                                                                                                                                                                                                                              | 54 |
|    | <b>Figure S8d.</b> COSY NMR (500 MHz, CDCl <sub>3</sub> ) of sinularcasbane D .....                                                                                                                                                                                                                                                                                                                                                                                         | 55 |
|    | <b>Figure S8e.</b> HSQC NMR (500 MHz, CDCl <sub>3</sub> ) of sinularcasbane D .....                                                                                                                                                                                                                                                                                                                                                                                         | 56 |
|    | <b>Figure S8f.</b> HMBC NMR (500 MHz, CDCl <sub>3</sub> ) of sinularcasbane D .....                                                                                                                                                                                                                                                                                                                                                                                         | 57 |
|    | <b>Figure S8g.</b> NOESY NMR (500 MHz, CDCl <sub>3</sub> ) of sinularcasbane D .....                                                                                                                                                                                                                                                                                                                                                                                        | 58 |
| 4. | CD-Spectroscopy .....                                                                                                                                                                                                                                                                                                                                                                                                                                                       | 59 |
|    | <b>Figure S9.</b> Circular dichroism spectroscopy of cyclooctat-9-en-7-ol (a), cyclooctat-9-en-5-7-diol (b), cyclooctatin (c) .....                                                                                                                                                                                                                                                                                                                                         | 59 |
| 5. | Mass spectrometry .....                                                                                                                                                                                                                                                                                                                                                                                                                                                     | 60 |
|    | <b>Figure S10a.</b> Mass spectrum of silylated cyclooctat-9-en-7-ol (RT: 21:16), recorded on a Trace GC Ultra with DSQII (Thermo Scientific), m/z was analyzed from [50-650]. m/z C <sub>23</sub> H <sub>42</sub> OSi calculated. 362.30. ....                                                                                                                                                                                                                              | 60 |
|    | <b>Figure S10b.</b> Mass spectrum of silylated cyclooctat-9-en-5,7-diol (RT: 22:94), recorded on a Trace GC Ultra with DSQII (Thermo Scientific), m/z was analyzed from [50-650]. m/z C <sub>26</sub> H <sub>50</sub> O <sub>2</sub> Si <sub>2</sub> calculated 450.33. ....                                                                                                                                                                                                | 60 |
|    | <b>Figure S10c.</b> Mass spectrum of silylated cyclooctatin (RT: 24:40), recorded on a Trace GC Ultra with DSQII (Thermo Scientific), m/z was analyzed from [50-650]. m/z C <sub>28</sub> H <sub>56</sub> O <sub>3</sub> Si <sub>3</sub> calculated 524.35. ....                                                                                                                                                                                                            | 61 |
|    | <b>Figure S10f.</b> Mass spectrum of sinularcasbane D (RT: 21:89), recorded on a Trace GC Ultra with DSQII (Thermo Scientific), m/z was analyzed from [50-650]. m/z C <sub>20</sub> H <sub>32</sub> O calculated 288.24. ....                                                                                                                                                                                                                                               | 61 |
|    | <b>Figure S11.</b> High resolution electron spray ionization of cyclooctat-9-en-7-ol (a) m/z ([M-H <sub>2</sub> O] <sup>+</sup> 272.2568 calculated C <sub>20</sub> H <sub>32</sub> 272.2504, cyclooctat-9-en-5-7-diol (b) m/z ([M-H <sub>2</sub> O] <sup>+</sup> 272.2450 calculated C <sub>20</sub> H <sub>32</sub> O 288.2453, cyclooctatin (c) m/z ([M-H <sub>2</sub> O] <sup>+</sup> 304.2415 calculated C <sub>20</sub> H <sub>32</sub> O <sub>2</sub> 304.2402. .... | 62 |
|    | <b>Figure S12.</b> GC-MS spectra from cell pellet extract of a 72h shake flask culture of (-)-casbene and hydroxylation to sinularcasbane D by CotB3 on a Trace GC Ultra with DSQII (Thermo Scientific).....                                                                                                                                                                                                                                                                | 63 |
| 6. | Genes .....                                                                                                                                                                                                                                                                                                                                                                                                                                                                 | 64 |
|    | <b>Figure S13.</b> Gene of 1-deoxy-D-xylulose 5-phosphate synthase ( <i>dxs</i> ) .....                                                                                                                                                                                                                                                                                                                                                                                     | 64 |
|    | <b>Figure S14.</b> Gene of 1-deoxy-D-xylulose 5-phosphate reductoisomerase ( <i>dxp</i> ) .....                                                                                                                                                                                                                                                                                                                                                                             | 65 |
|    | <b>Figure S15.</b> Bi-cistronic operon of 2-C-methyl-D-erythriol 4-phosphate cytidyltransferase synthase ( <i>ispD</i> ) 2-C-methyl-D-erythritol 2,4-cyclodiphosphate synthase ( <i>ispF</i> ) .....                                                                                                                                                                                                                                                                        | 66 |
|    | <b>Figure S16.</b> Gene of Isopentenyl-diphosphate delta isomerase ( <i>Idi</i> ) .....                                                                                                                                                                                                                                                                                                                                                                                     | 66 |
|    | <b>Figure S17.</b> Gene of <i>cotB2</i> .....                                                                                                                                                                                                                                                                                                                                                                                                                               | 67 |
|    | <b>Figure S18.</b> Bi-cistronic <i>cotB3/cotB4</i> operon .....                                                                                                                                                                                                                                                                                                                                                                                                             | 68 |
|    | <b>Figure S19.</b> Bi-cistronic <i>afR/afx</i> operon .....                                                                                                                                                                                                                                                                                                                                                                                                                 | 69 |
|    | <b>Figure S20.</b> Bi-cistronic <i>pdR/pdx</i> operon .....                                                                                                                                                                                                                                                                                                                                                                                                                 | 70 |
|    | <b>Figure S21.</b> (-)-casbene synthase ( <i>cs</i> ) from <i>Jatropha curcas</i> .....                                                                                                                                                                                                                                                                                                                                                                                     | 71 |

**Figure S22.** Taxadiene synthase (*txs*) from *Taxus brevifolia* ..... 72

## 1. *In vivo* assay

**Figure S1a.** *In vivo* assay for the conversion of cyclooctat-9-en-7-ol by CotB3 to cyclooctat-9-en-5,7-diol using different redox system variants. The data is illustrated as boxplot diagram (25% to 75% with whiskers with maximum 1.5 IQR) from five whole cell hydroxylation experiments. 100% yield correspond to the median of the CotB3/AfR/Afx control.

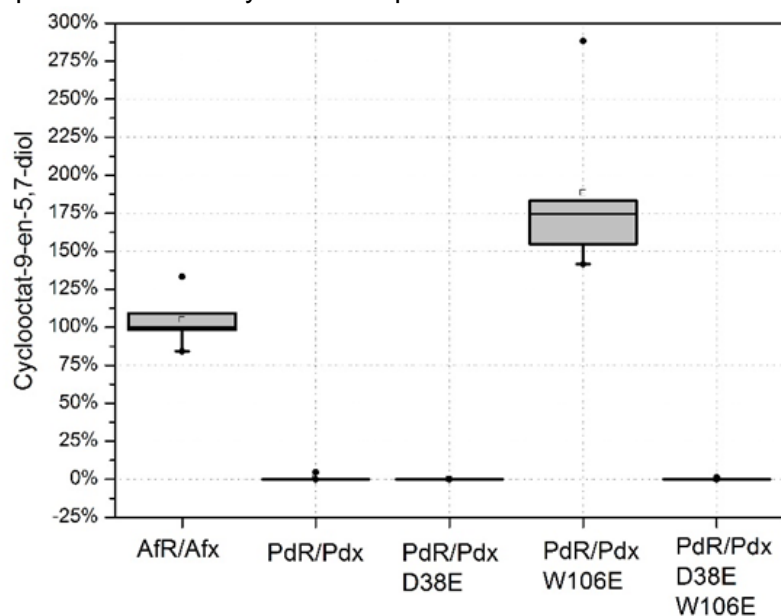

**Figure S1b.** *In vivo* assay for the conversion of cyclooctat-9-en-5,7-diol by CotB4 to cyclooctatin using different redox system variants. The data is illustrated as boxplot diagram (25% to 75% with whiskers with maximum 1.5 IQR) from five whole cell hydroxylation experiments. 100% yield correspond to the median of the CotB3/AfR/Afx control.

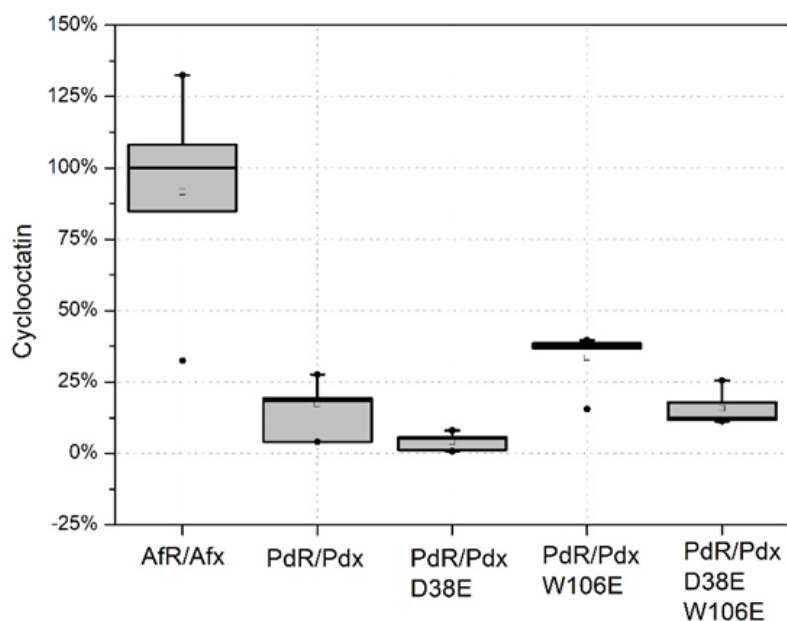

**Figure S1c.** SDS-Page of the whole cell proteome from the *in vivo* assay (24 hours). The catalytic efficiency of CotB3 was evaluated using different redox system variants.

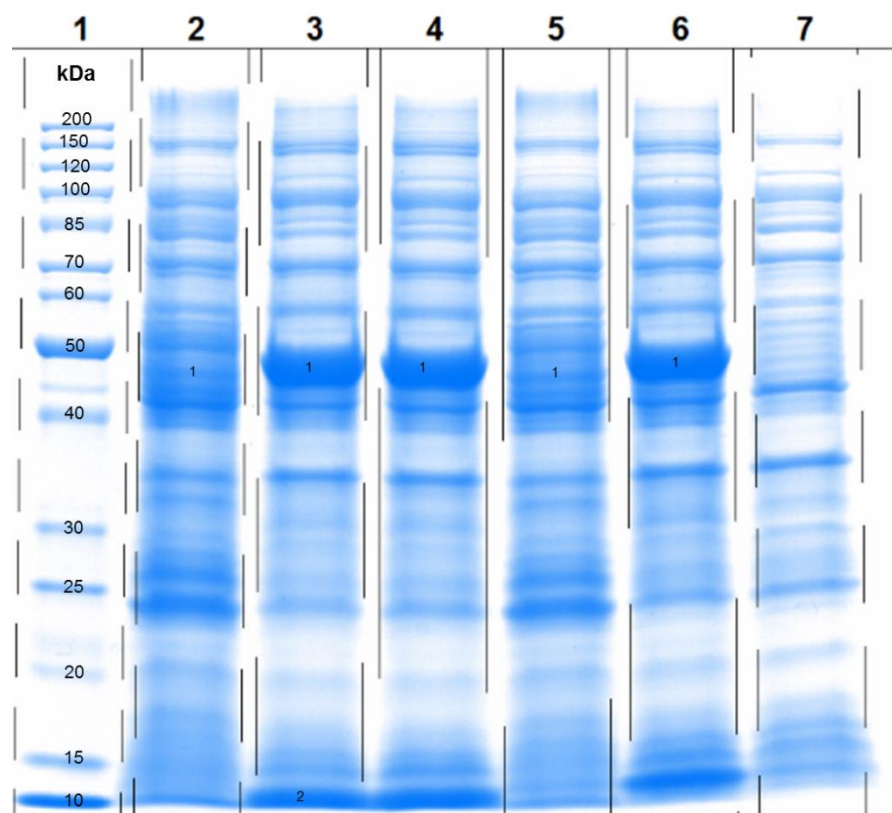

**Table S1.** Description of Figure S1c

| <b>Lane #</b> | <b>Lane Description</b>                           | <b>Protein Band #</b> | <b>Protein Identified</b> |
|---------------|---------------------------------------------------|-----------------------|---------------------------|
| 1             | Marker                                            | 1                     | CotB3                     |
| 2             | pACYC-Duet-1 ( <i>afR/afx</i> , cotB3)            | 2                     | Pdx                       |
| 3             | pACYC-Duet-1 ( <i>pdR/pdx</i> , cotB3)            |                       |                           |
| 4             | pACYC-Duet-1 ( <i>pdR/pdx</i> -D38E, cotB3)       |                       |                           |
| 5             | pACYC-Duet-1 ( <i>pdR/pdx</i> -D38E, cotB3)       |                       |                           |
| 6             | pACYC-Duet-1 ( <i>pdR/pdx</i> -D38E/W106E, cotB3) |                       |                           |
| 7             | pACYC-Duet-1 (empty)                              |                       |                           |



**Figure S1d.** SDS-Page of the whole cell proteome from the *in vivo* assay (24 hours). The catalytic efficiency of CotB4 was evaluated using different redox system variants.

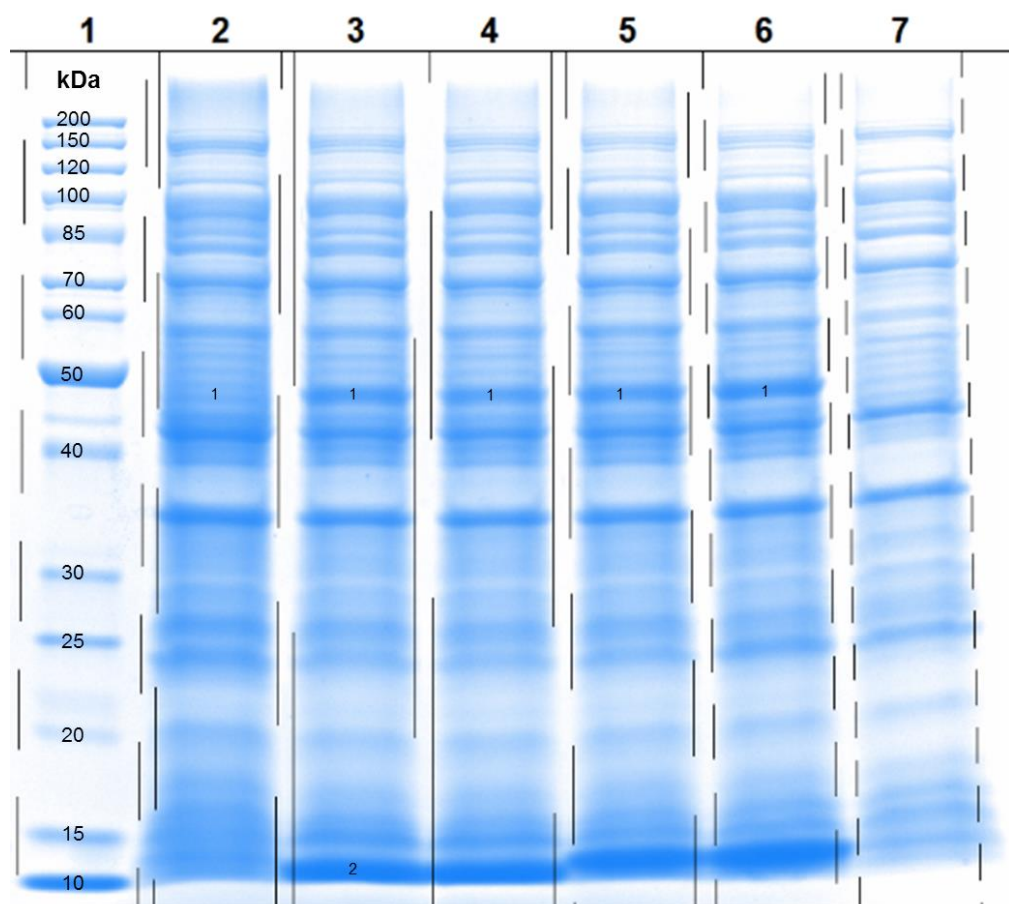

**Table S2.** Description of Figure S1d

| <b>Lane #</b> | <b>Lane Description</b>                           | <b>Protein Band #</b> | <b>Protein Identified</b> |
|---------------|---------------------------------------------------|-----------------------|---------------------------|
| 1             | Marker                                            | 1                     | CotB4                     |
| 2             | pACYC-Duet-1 ( <i>afR/afx</i> , cotB4)            | 2                     | Pdx                       |
| 3             | pACYC-Duet-1 ( <i>pdR/pdx</i> , cotB4)            |                       |                           |
| 4             | pACYC-Duet-1 ( <i>pdR/pdx-D38E</i> , cotB4)       |                       |                           |
| 5             | pACYC-Duet-1 ( <i>pdR/pdx-D38E</i> , cotB4)       |                       |                           |
| 6             | pACYC-Duet-1 ( <i>pdR/pdx-D38E/W106E</i> , cotB4) |                       |                           |
| 7             | pACYC-Duet-1 (empty)                              |                       |                           |

## 2. Bioinformatics

**Figure S2a.** Model of CotB3 harboring cyclooct-9-en-7-ol. Modelled CotB3 (gray), prosthetic heme group (magenta) and cyclooct-9-en-7-ol (blue).

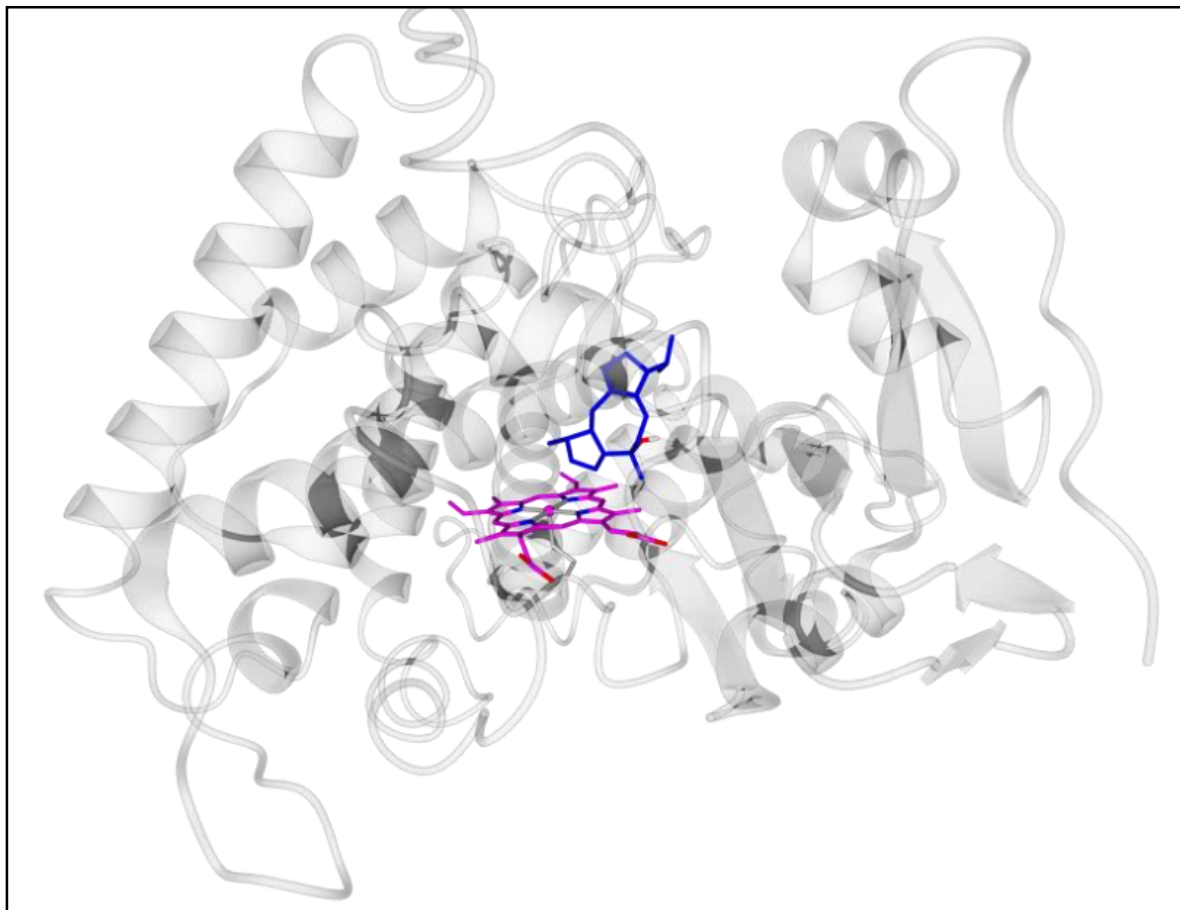

**Figure S2b.** Structural alignment of CotB3 (cyan) and P450cam (PDB-ID: 4JX1, red). The alignment has an RMSD of 0.142 Å over 313 aligned residues with 19% sequence identity. Note that the RMSD value considers only atoms that are present in both structures. Not matching loops in CotB3 are not incorporated into the alignment. The interaction region of CotB3 with Afx/Pdx is part of the matched helical structures.

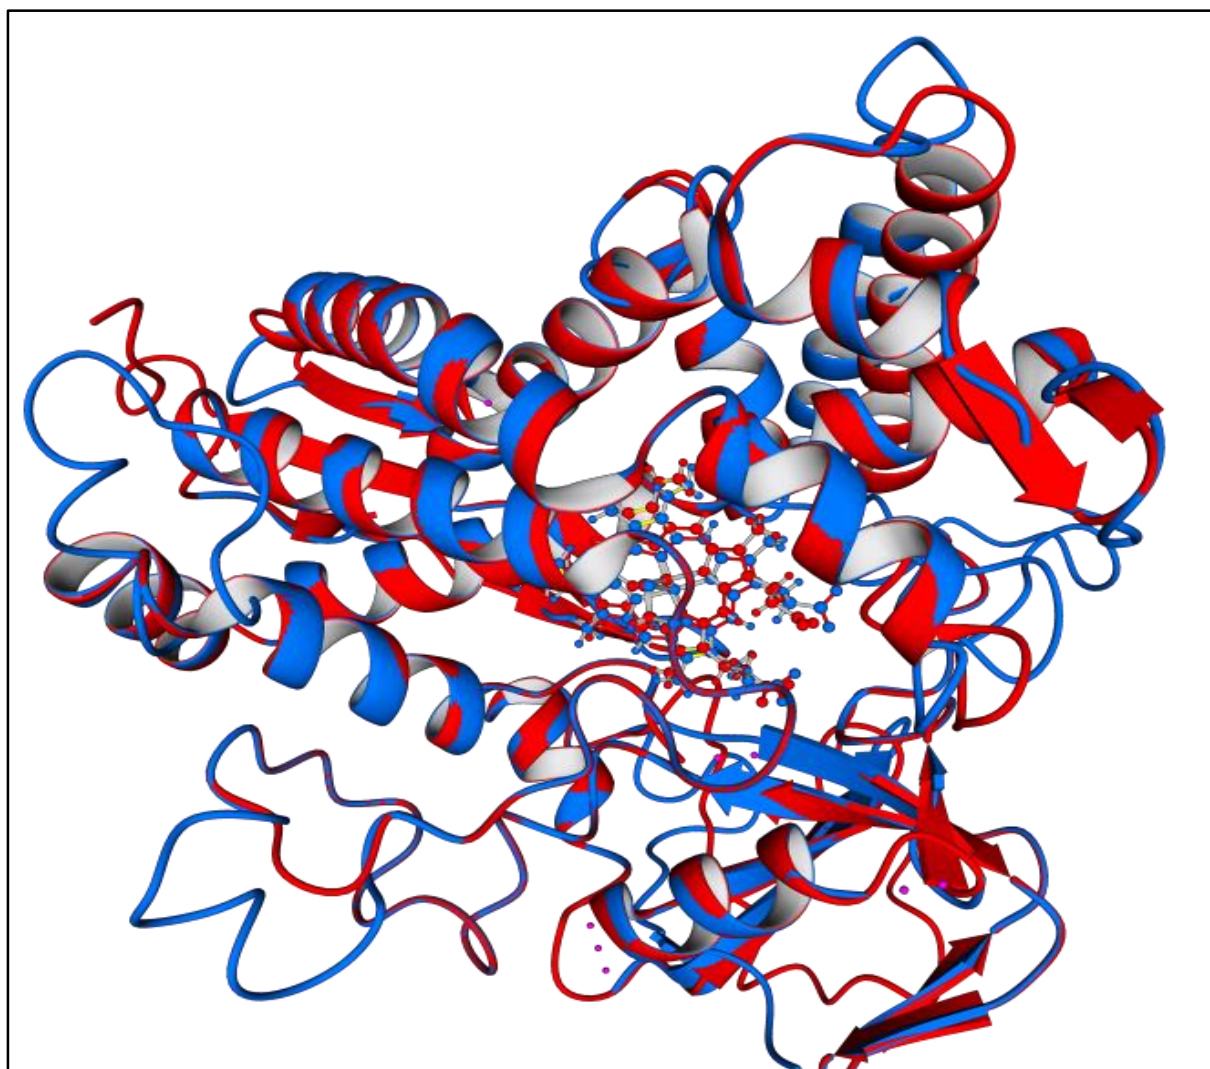

**Figure S2c.** Model of CotB4 harboring cyclooct-9-en-5,7-diol. Modelled CotB4 (gray), prosthetic heme group (magenta) and cyclooct-9-en-5,7-diol (blue).

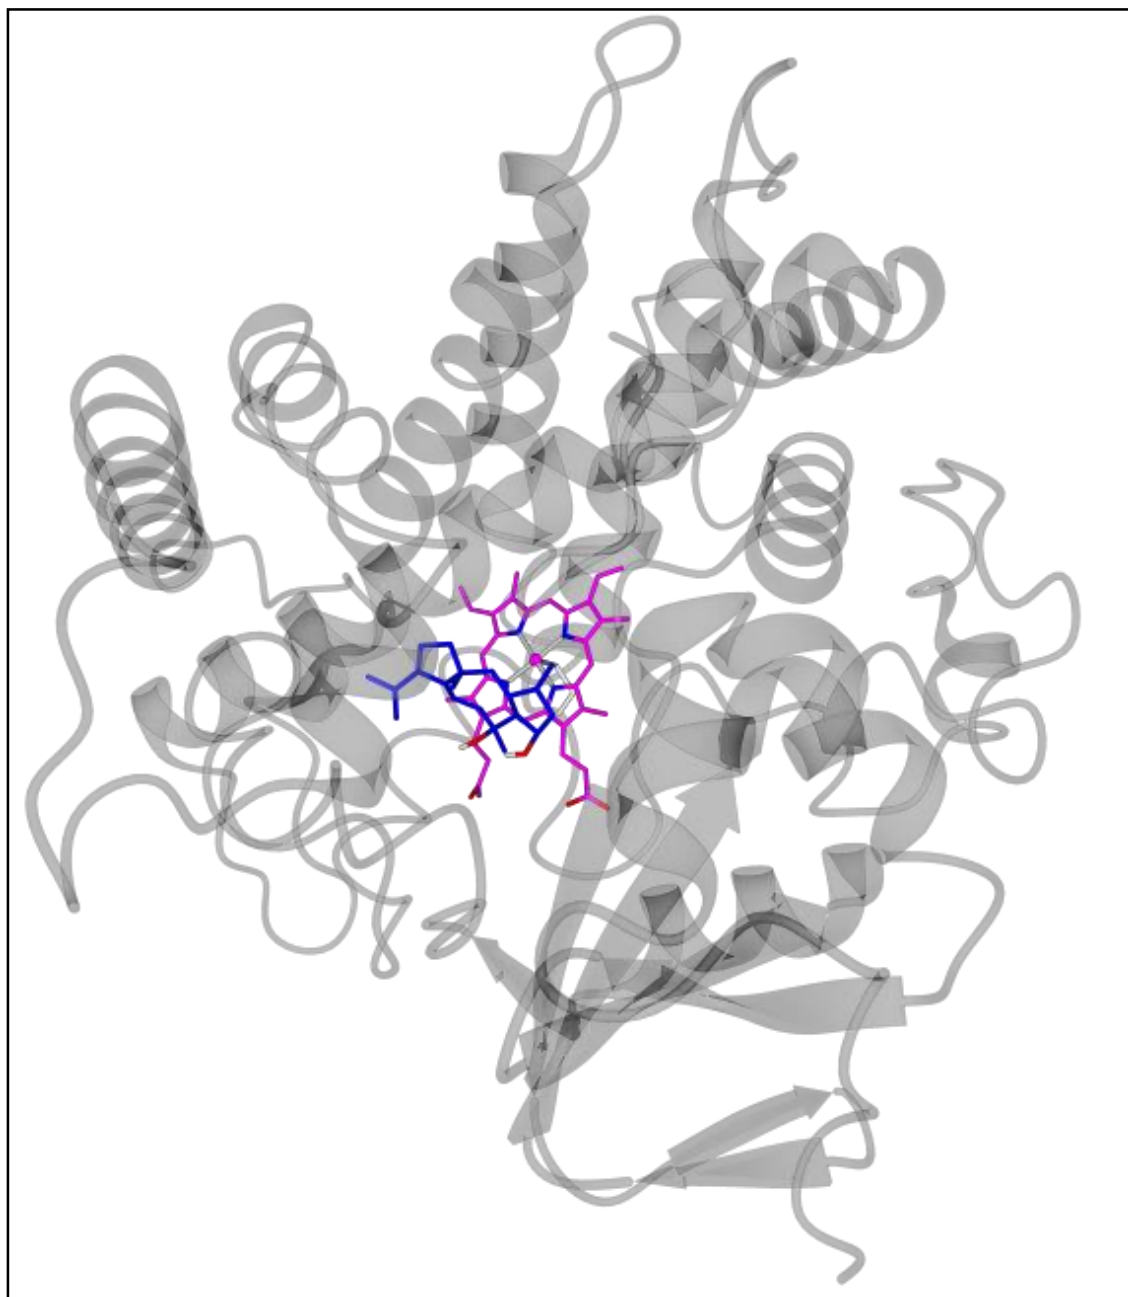

**Fig S2d.** Structural alignment of CotB4 (cyan) and P450cam (PDB-ID: 4JX1, red). The alignment has an RMSD of 0.144 Å over 339 aligned residues with 18% sequence identity. Note that the RMSD value considers only atoms that are present in both structures. Not matching loops in CotB4 are not incorporated into the alignment. The interaction region of CotB4 with Afx/Pdx is part of the matched helical structures.

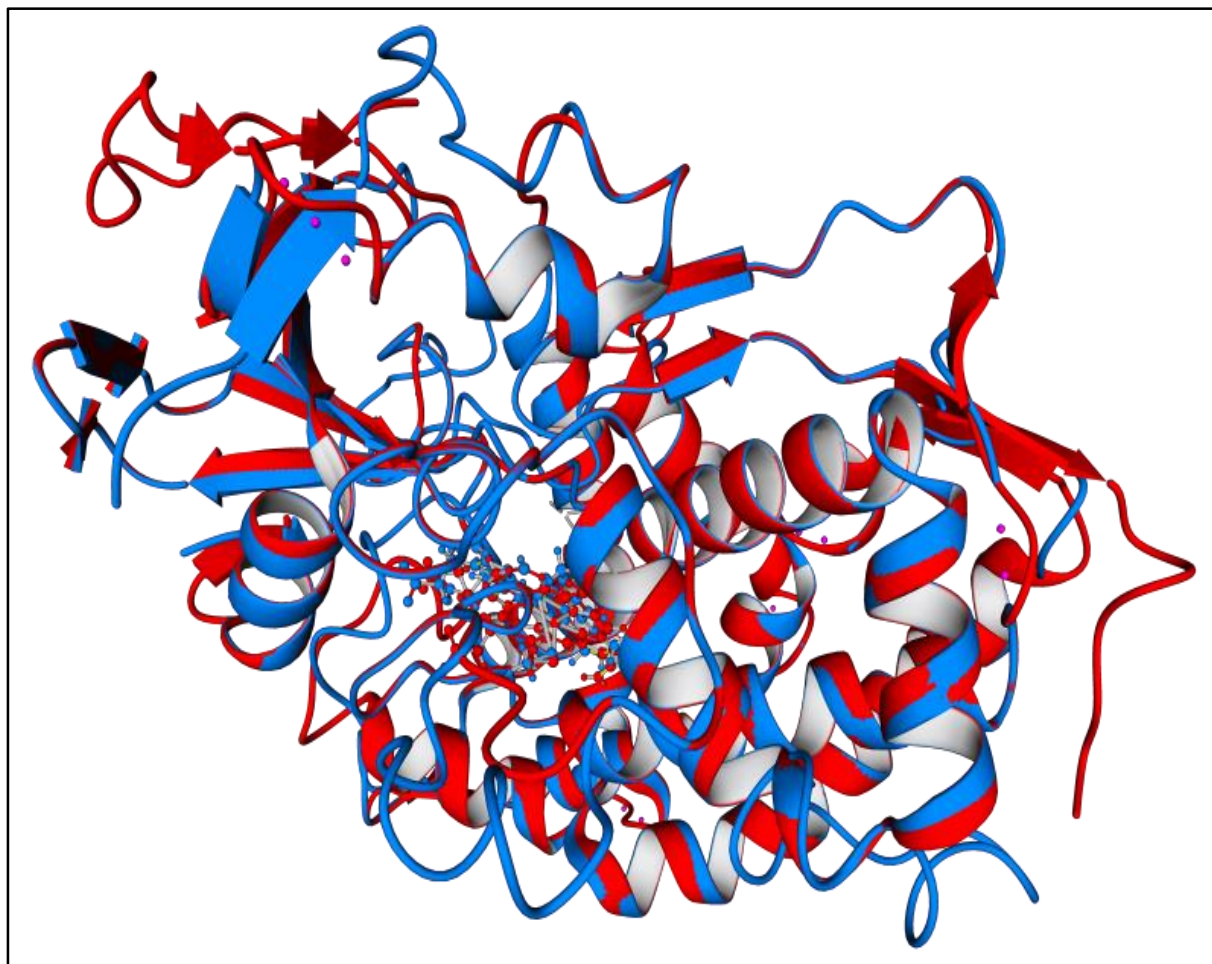



**Figure S2e.** Modelled AfR•Afx complex with AfR harboring FAD (Flavin-Adenine-Dinucleotide) and Afx harboring inorganic Fe<sub>2</sub>/S<sub>2</sub>-cluster. AfR•Afx complex (dark blue/gray). AfR with bound prosthetic FAD (magenta) and Afx bound to inorganic Fe<sub>2</sub>/S<sub>2</sub>-cluster (light blue). W297 of AfR proposed to be acting in electron transfer is shown in red.

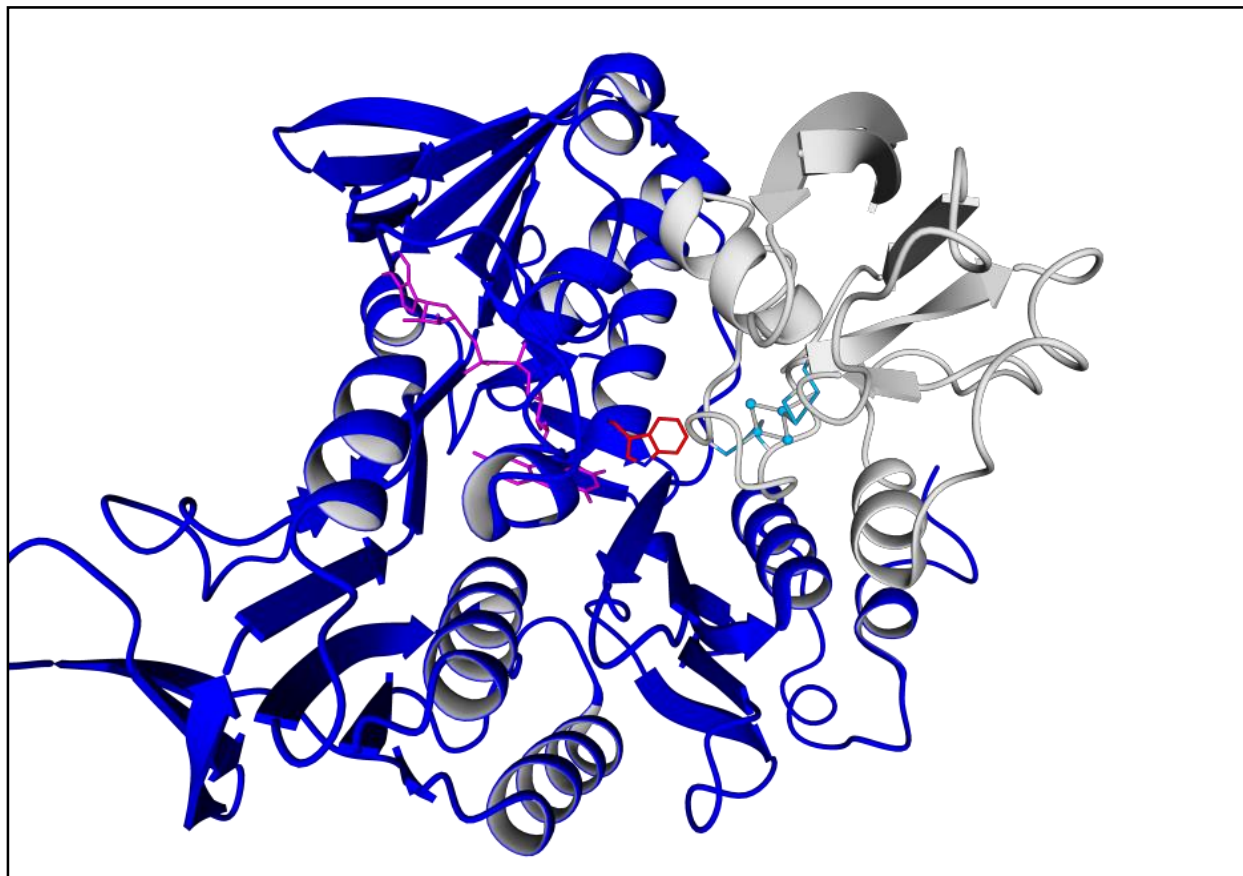

**Figure S2f.** Modelled CotB3•Afx complex harboring cyclooct-9-en-7-ol. CotB3•Afx complex (dark blue/orange). CotB3 contains prosthetic heme group (magenta) and cyclooct-9-en-7-ol (light blue). Afx bound to inorganic Fe<sub>2</sub>/S<sub>2</sub>-cluster (green/magenta).

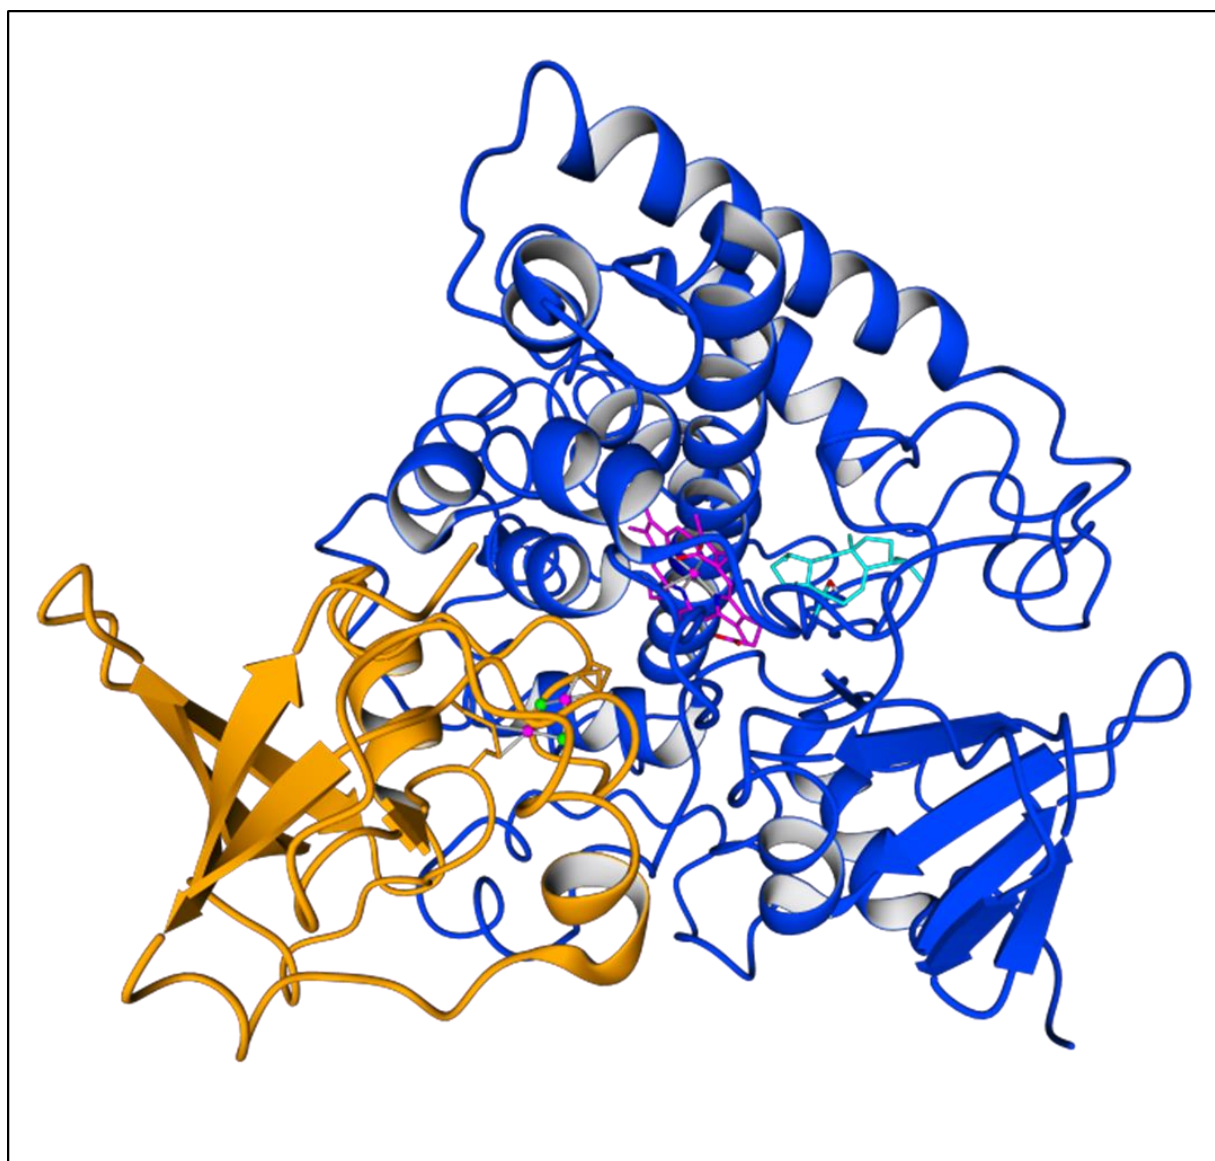

**Figure S2g.** Modelled CotB4•Afx complex harboring cyclooct-9-en-7-ol. CotB4•Afx complex (dark blue/orange). CotB4 contains prosthetic heme group (magenta) and cyclooct-9-en-5,7-diol (light blue). Afx contains inorganic Fe<sub>2</sub>/S<sub>2</sub>-cluster (green/magenta).

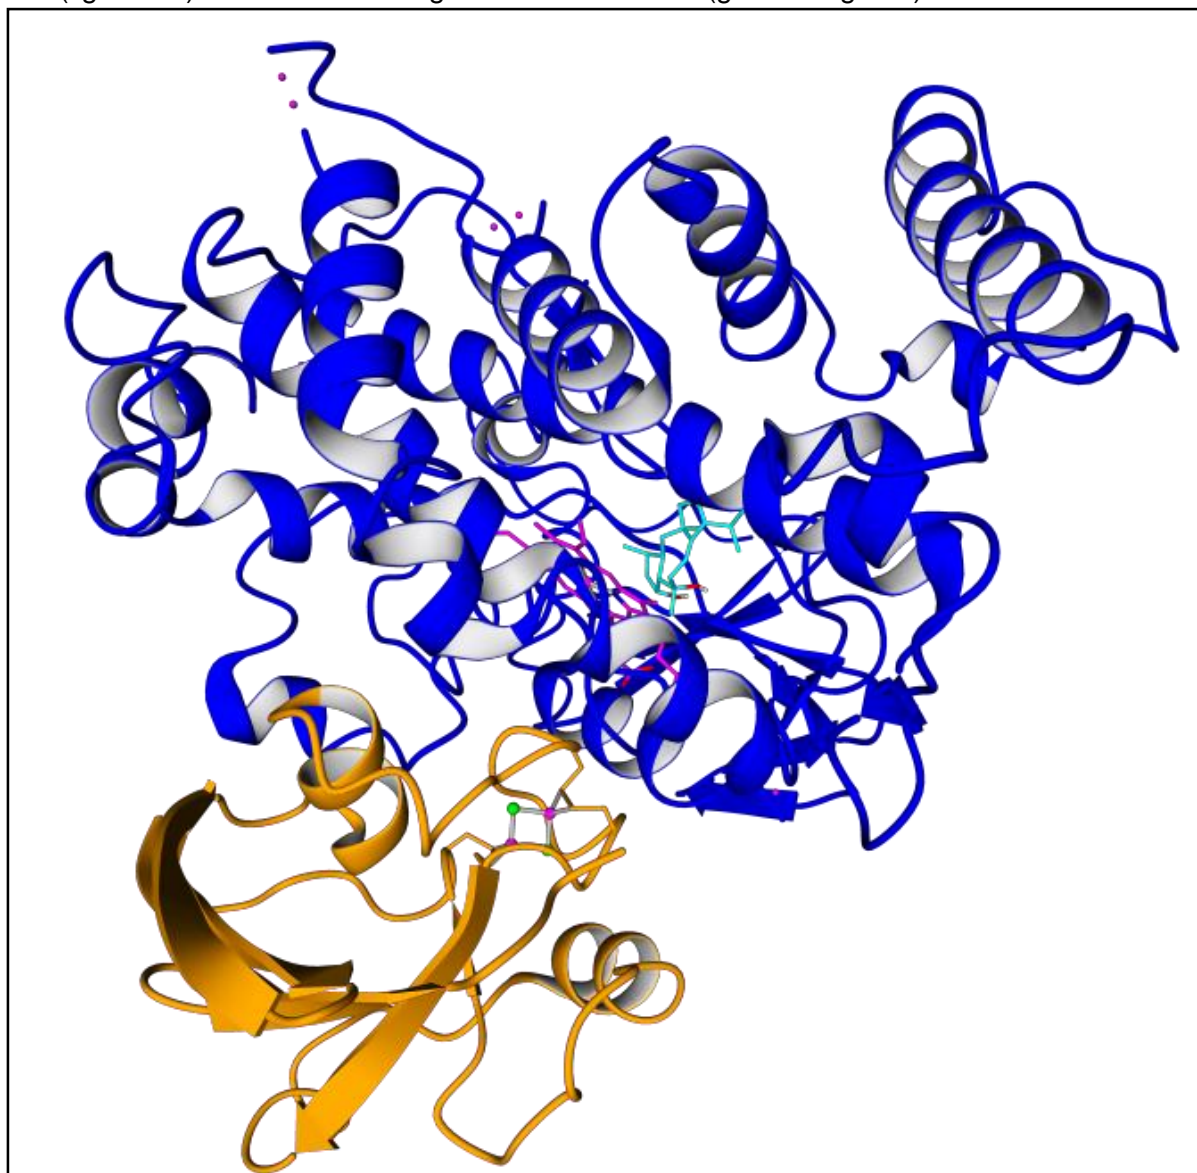



**Figure S2h.** Inner view of the Cotb3•Pdx complex (dark blue•red). Pdx contains inorganic Fe<sub>2</sub>/S<sub>2</sub>-cluster (green/magenta). CotB3 contains prosthetic heme group (gray) and cyclooct-9-en-7-ol (red). Essential hydrogen bonds for the interaction of Pdx and CotB3 to facilitate binding and electron transport are highlighted in black. Hydrogen bond formation between CotB3<sub>R110</sub> and CotB3<sub>R114</sub> with Pdx<sub>W106</sub> needed for efficient binding and electron transfer, is strongly impaired due to the chemical nature of participating amino acids. The Cotb4•Pdx complex exhibits the same structure and also the same interacting residues.

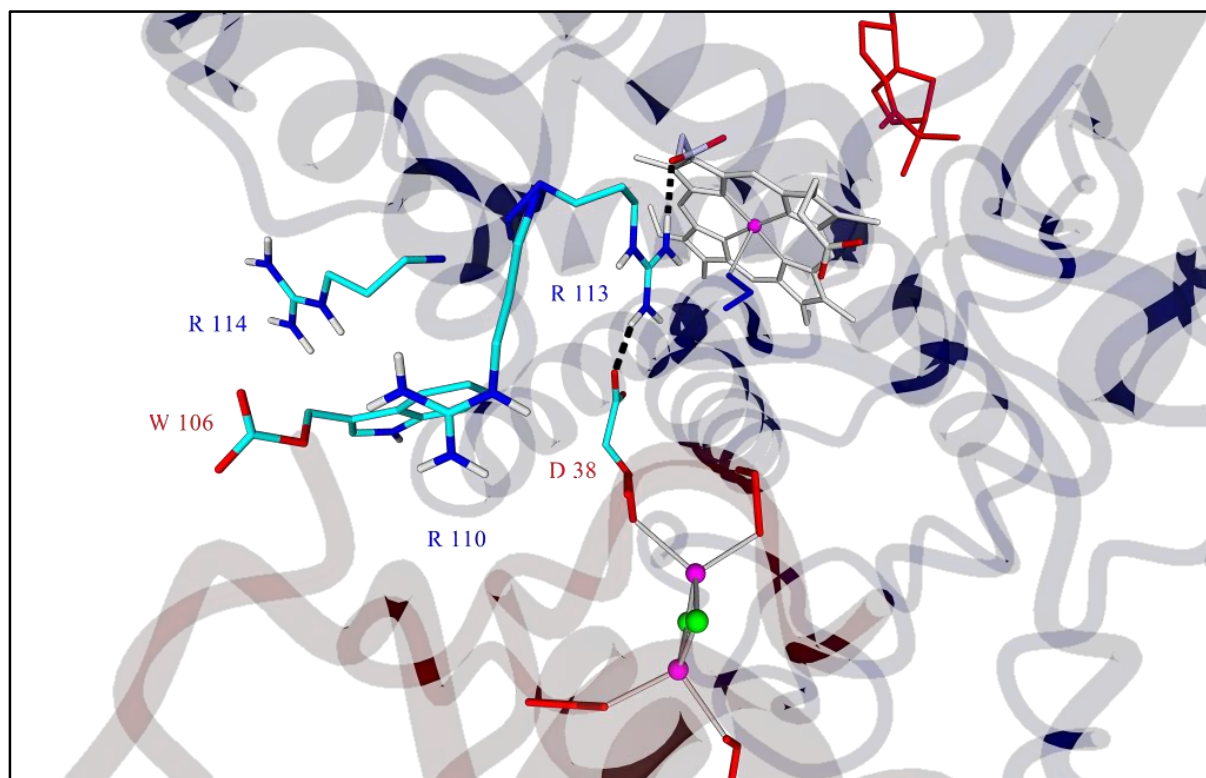

**Figure S2i.** Inner view of the Cotb4•Afx complex (dark blue•red). Afx contains inorganic Fe<sub>2</sub>/S<sub>2</sub>-cluster (green/magenta). CotB4 contains prosthetic heme group (gray) and cyclooct-9-en-5,7-diol (red). Essential hydrogen bonds for the interaction of Afx and CotB4 to facilitate binding and electron transport are highlighted in black.

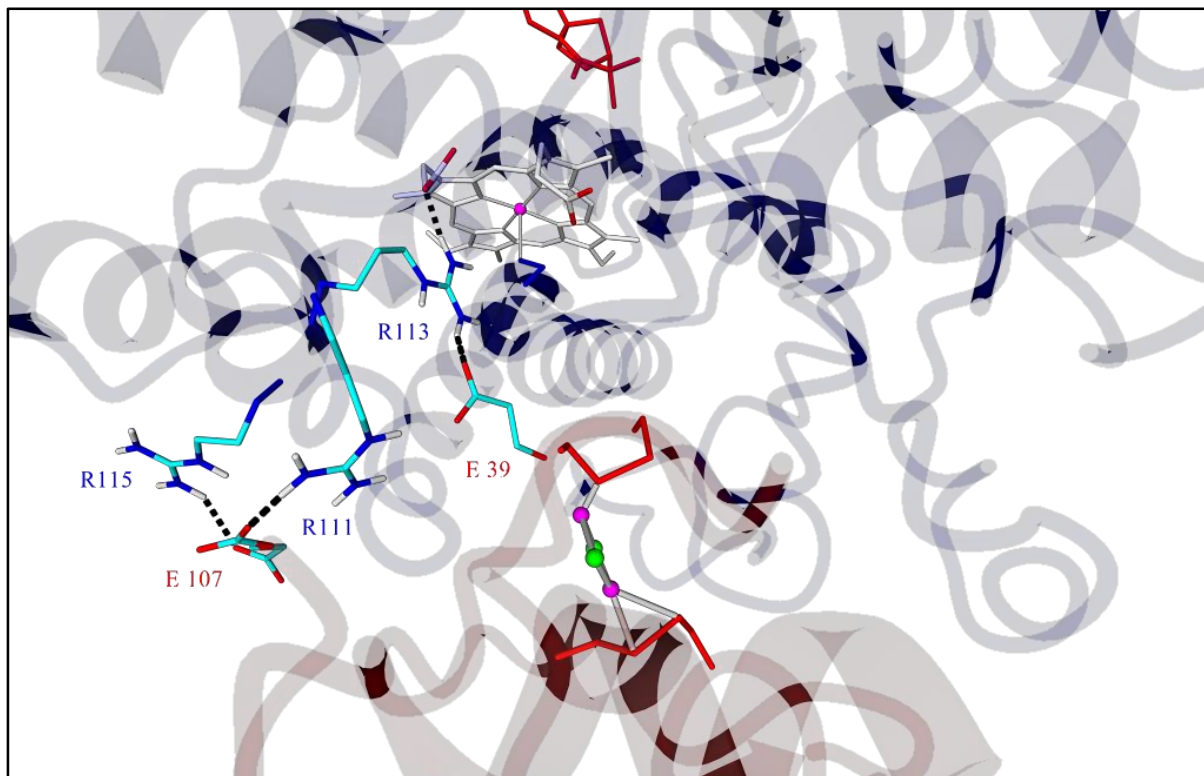

**Figure S2j.** Structural superposition of the PdR•Pdx (red•blue) with the modelled AfR•Afx complex (ocher•gray). Prosthetic FAD group of PdR and modelled AfR are shown in light blue. 2Fe-2S cluster of Pdx and modelled Afx are shown in magenta/green. The important hydrogen bridge (black) between Pdx<sub>D38</sub> and PdR<sub>R310</sub> needed for binding as well as PdR<sub>W330</sub> facilitating electron transport are shown. Differing position of PdR<sub>W330</sub> corresponding to W297 in AfR, presumably acting in electron transfer from FAD to Pdx is shown in ocher. Analogous interactions facilitating binding of AfR to Afx could not be deciphered. Substitution of Pdx<sub>D38</sub> to E38 is suggested to impair electron transport by an alternate binding mode of Pdx<sub>D38E</sub> to native PdR.

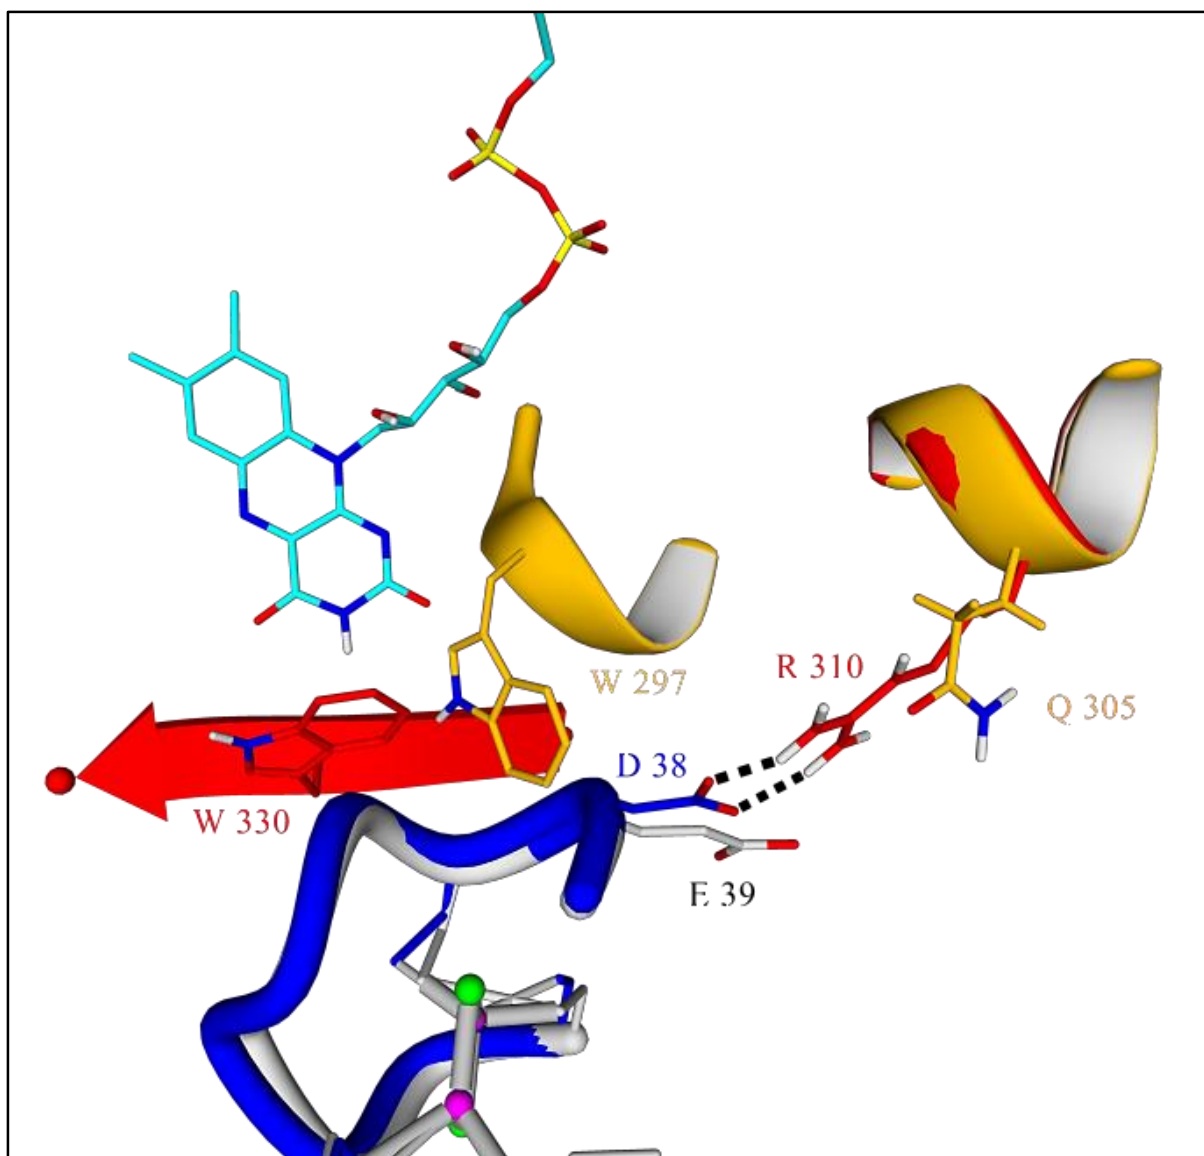

**Figure S2k.** Modelled CotB3 harboring (-)-casbene. CotB3 (light purple) contains prosthetic heme group (blue) and docked (-)-casbene (gray). The heme group contains the iron cation (magenta) and the dative bond to cysteine 408 (green) of the CotB3. (-)-Casbene is shown in the conformation comprising the lowest binding energy derived by cluster analysis of AutodockVina. Hydroxylated C-10 of (-)-casbene is shown in blue.

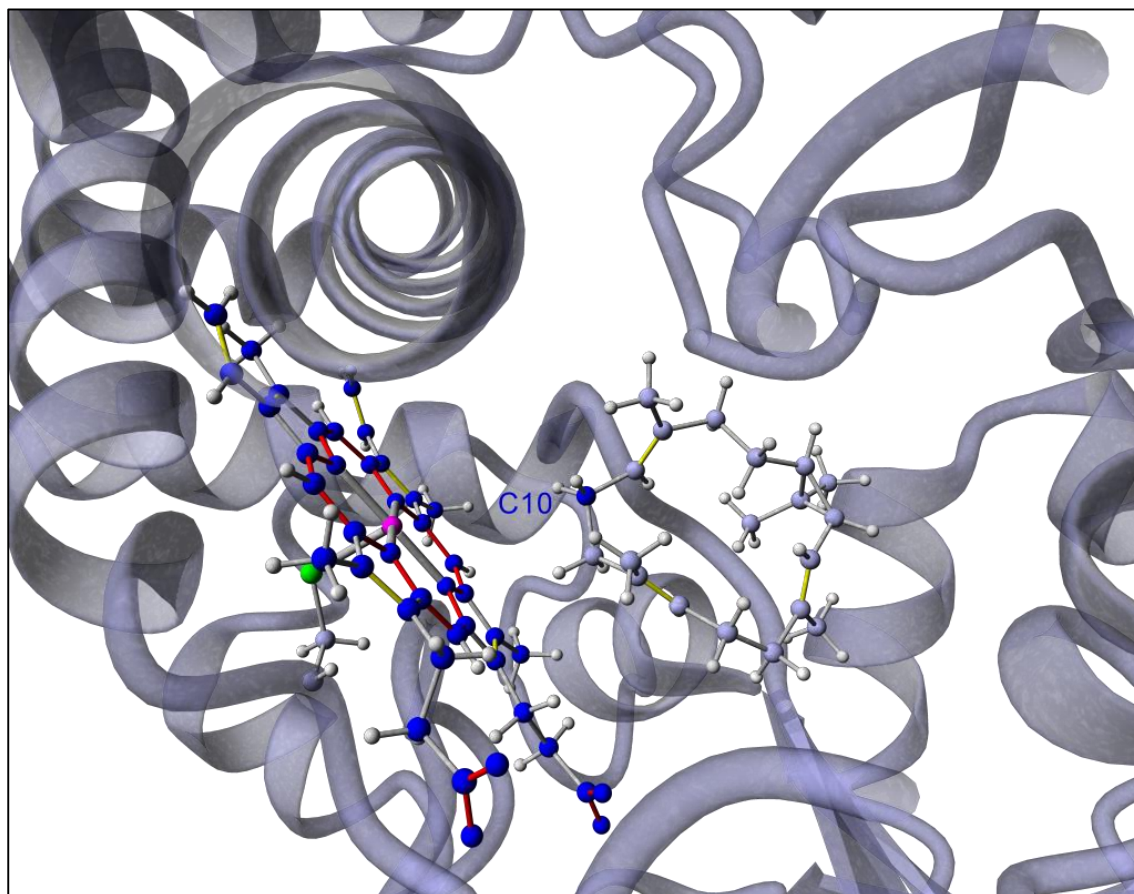

**Figure S21.** Modelled CotB3 harboring sinularcasbane D. CotB3 (light purple) contains prosthetic heme group (blue) and docked sinularcasbane D (gray). The heme group contains the iron cation (magenta) and the dative bond to cysteine 408 (green) of the CotB3. Sinularcasbane D is shown in the conformation comprising the lowest binding energy derived by cluster analysis of AutodockVina.

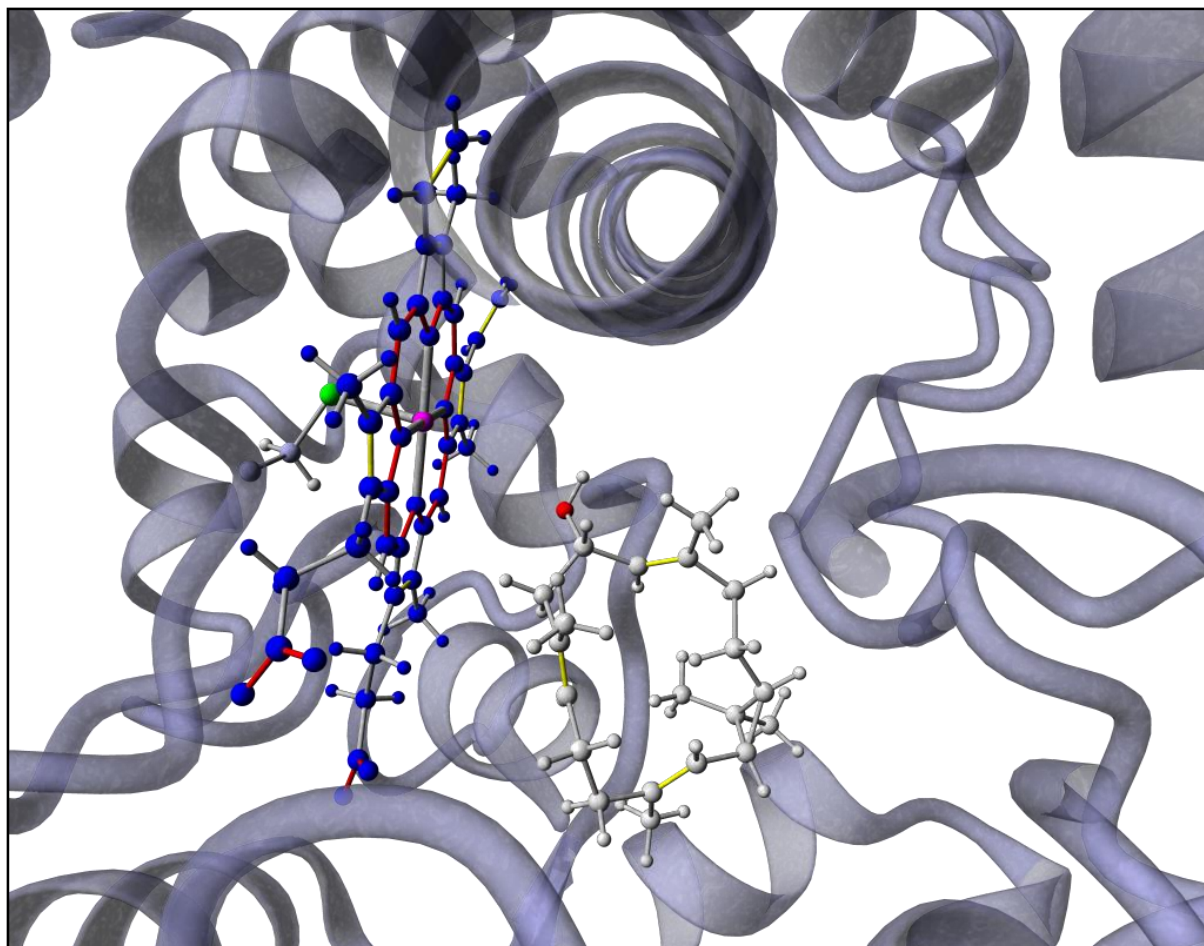



**Table S3.** PROCHECK results of CotB3/4, AfR and Afx.

|       | Most favored regions in<br>RAMACHANDRAN Plot [%] | G-factor/ dihedral angles<br>[average score] | G-factor/Main-chain<br>covalent forces<br>[average score] |
|-------|--------------------------------------------------|----------------------------------------------|-----------------------------------------------------------|
| CotB3 | 92.5                                             | -0.20                                        | -0.29                                                     |
| CotB4 | 90.4                                             | -0.27                                        | -0.32                                                     |
| AfR   | 92.8                                             | -0.01                                        | -0.13                                                     |
| Afx   | 94.1                                             | -0.02                                        | -0.09                                                     |

Our models exceed the demanded 90% of the RAMACHANDRAN Plot factoring, which indicates that these are excellent models. Also the G-factors are all above the -0.5 threshold indicating that no unusual folding patterns occur.

#### QMEAN Z-scores

**Figure S2m.** QMEAN Z-score of the AfR model (-0.31).

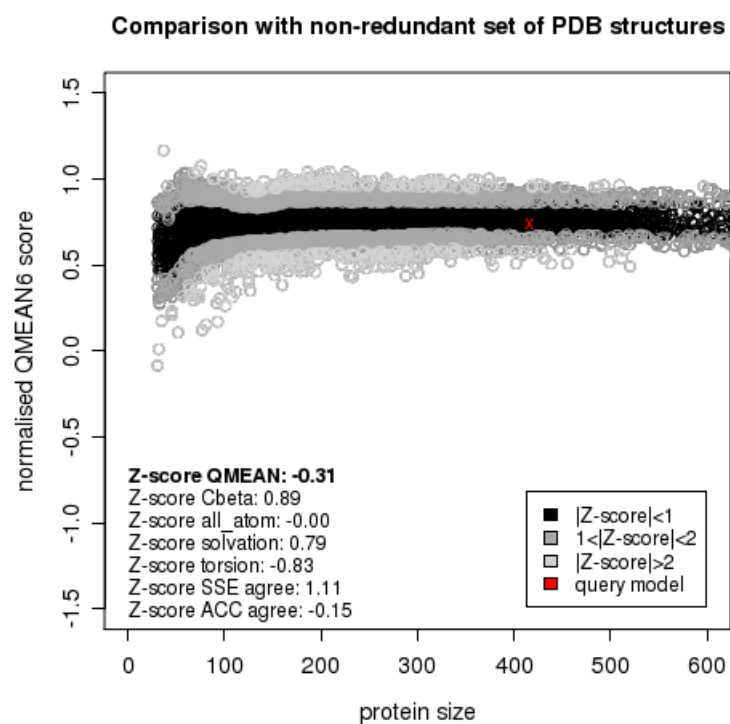

**Figure S2n.** QMEAN Z-score of the Afx model (-0.10).

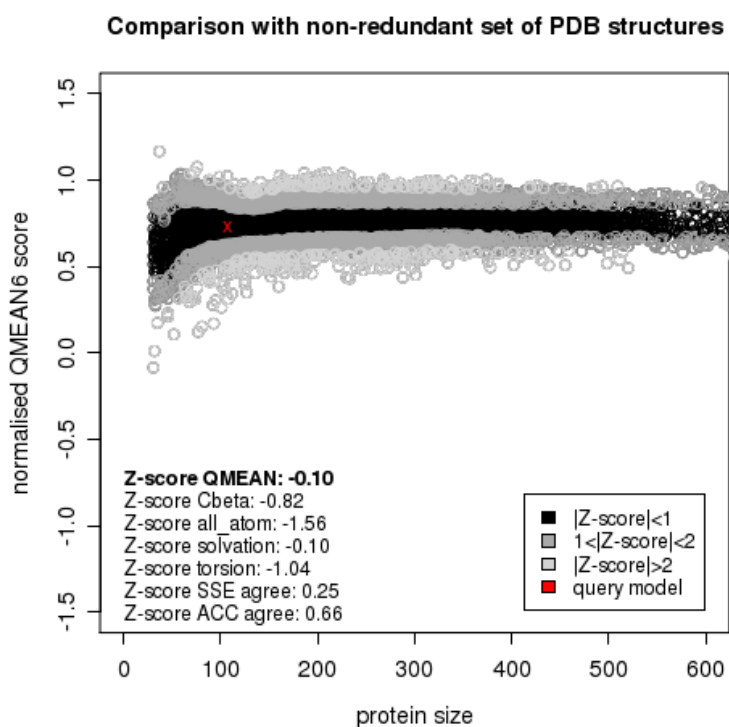

**Figure S2o.** QMEAN Z-score of the CotB3 model (-1.15).

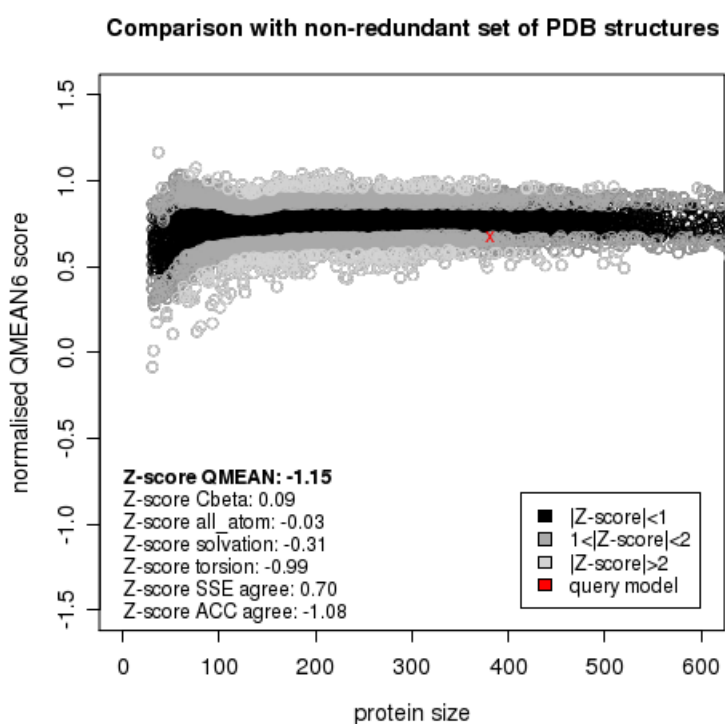

**Figure S2p.** QMEAN Z-score of the CotB4 model (-1.33).

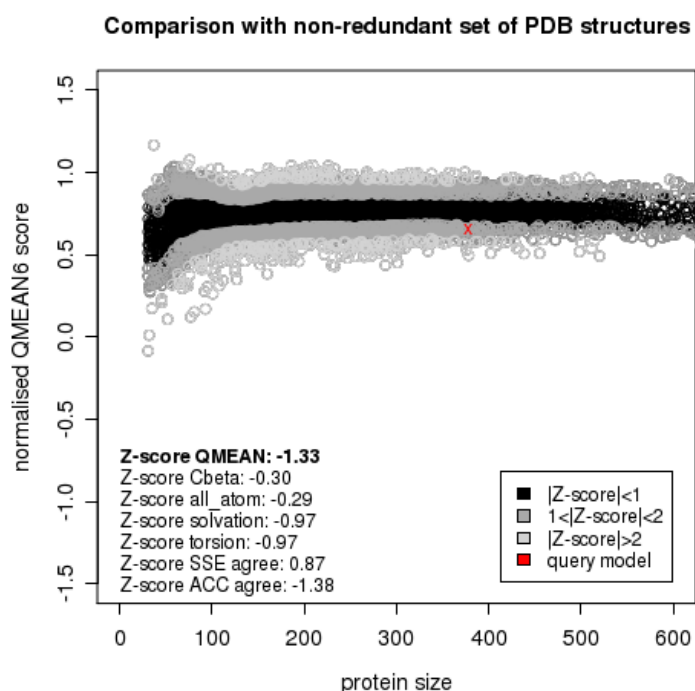

The QMEAN Z-score of the aforementioned modeled proteins suggest that these models are of comparable quality to high resolution experimental structures. The reference structures are a non-redundant subset of the PDB sharing less than 30% sequence identity among each other and are solved at a resolution below than 2 Å.

The structural overlap of the PdR•Pdx and AfR•Afx complexes displayed high agreement and were therefore not subjected to further adjustments. In contrast, the hydroxylases CotB3/4 showed extended secondary structure motifs compared to the P450cam template. Both CotB3/4 display additional loop regions which are missing in P450cam. Consequently, the extra protein loops could not be aligned with the P450cam template (Figure S2b, d). Hence the extra loops will also complicate the quality assessments as *ab initio* loop modelling of unknown proteins are a typical source of error during modelling approaches. Therefore, we have excluded the extra loop regions in CotB3/4 in our PROCHECK and QMEAN Z-score quality assessments. As the excluded loops are neither in the vicinity of the active site, heme group or the ferredoxin interaction domain, an effect on identification of essential amino acid interactions can be excluded. In the absence of x-ray crystal structures, our modelling methodology provides the best insights into the essential protein interactions that drive the observed catalytic processes.



### 3. NMR-Spectroscopy

**Figure S3a.**  $^1\text{H}$  NMR (500 MHz,  $\text{CDCl}_3$ ) of cyclooctat-9-en-7-ol.

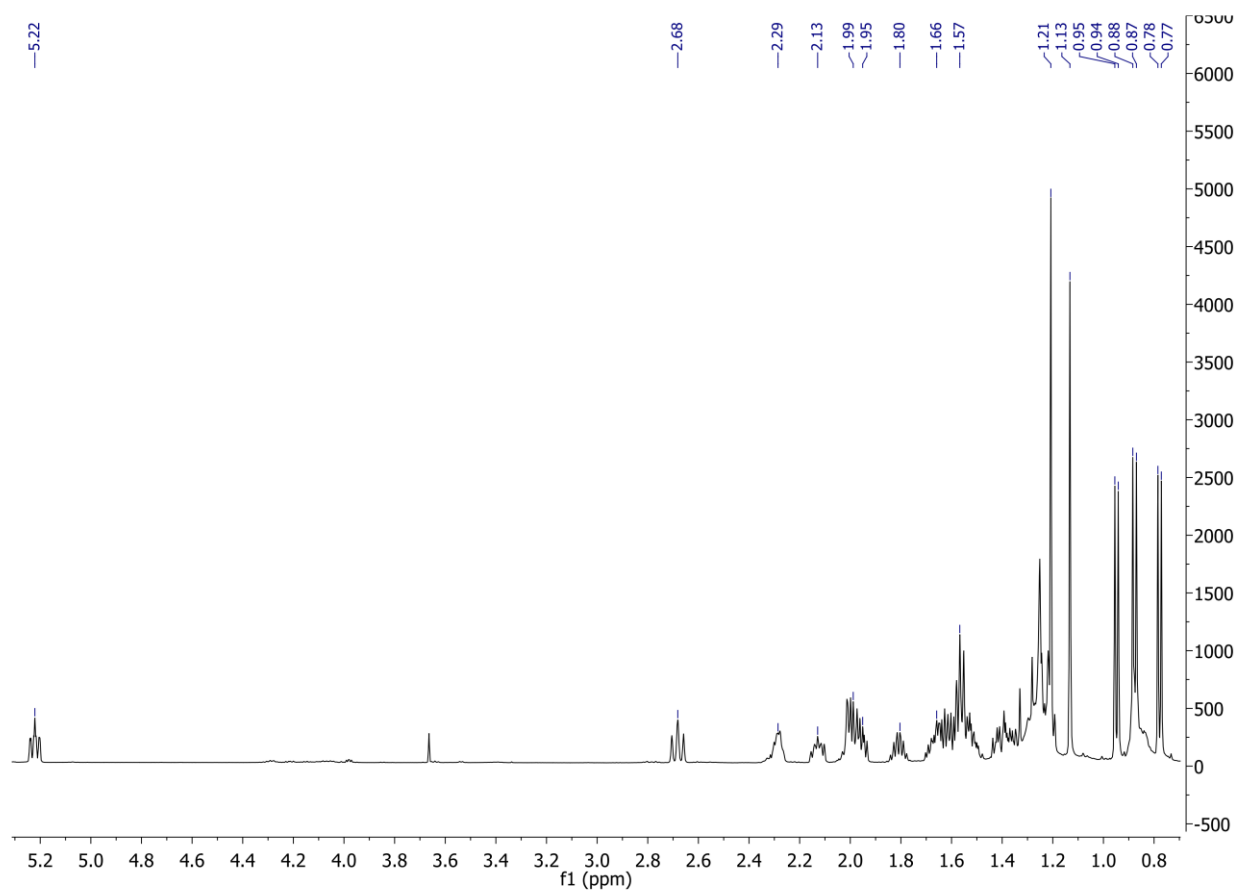

**Figure S3b.**  $^{13}\text{C}$  NMR (125 MHz,  $\text{CDCl}_3$ ) of cyclooctat-9-en-7-ol.

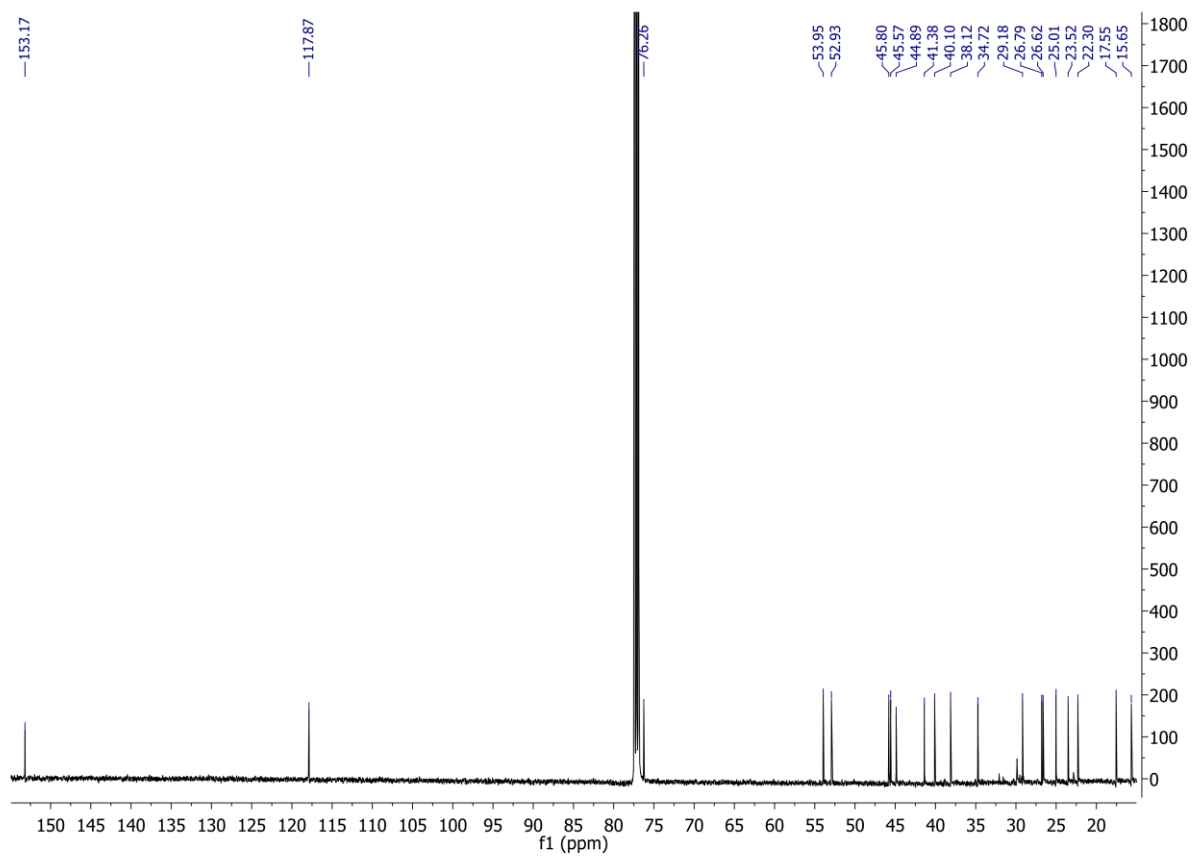

**Figure S3c.**  $^1\text{H}$  NMR (500 MHz,  $\text{CDCl}_3$ ) of cyclooctat-9-en-5,7-diol.

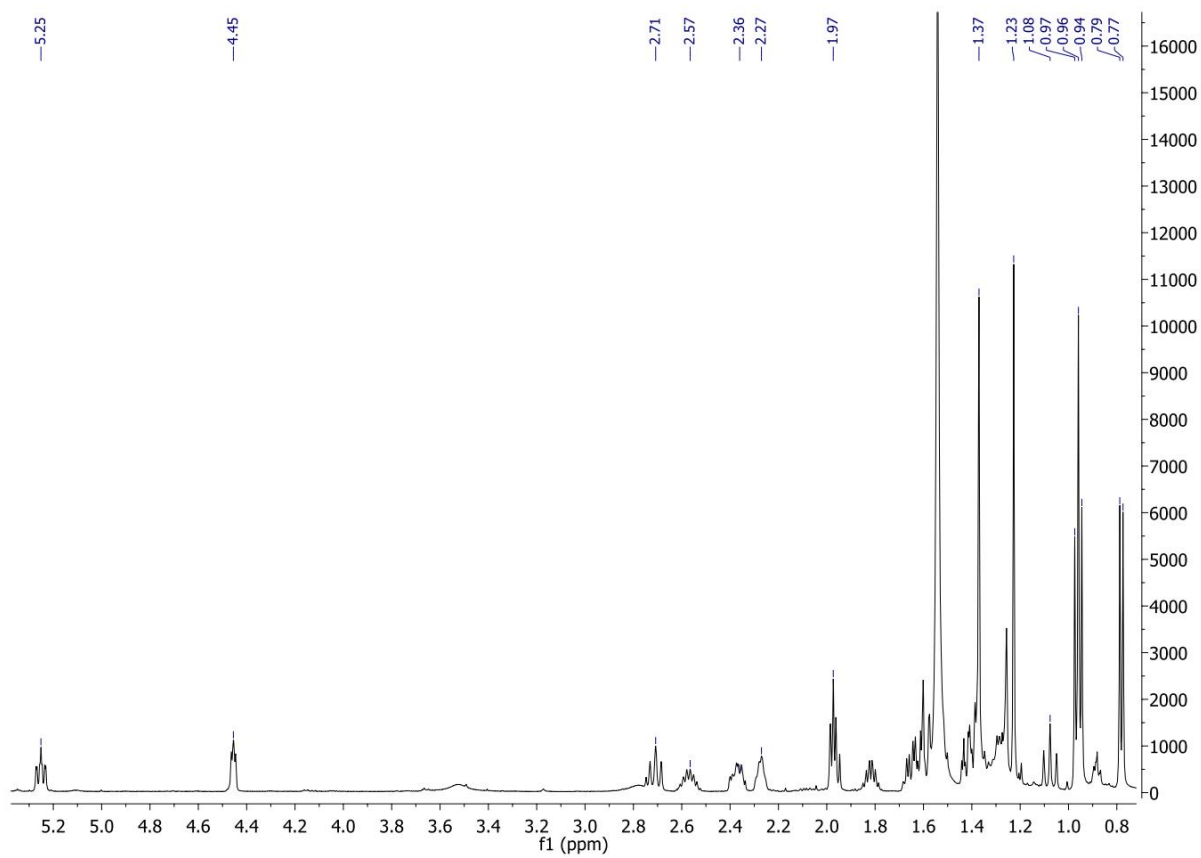

**Figure S3d.**  $^{13}\text{C}$  NMR (125 MHz,  $\text{CDCl}_3$ ) of cyclooctat-9-en-5,7-diol.

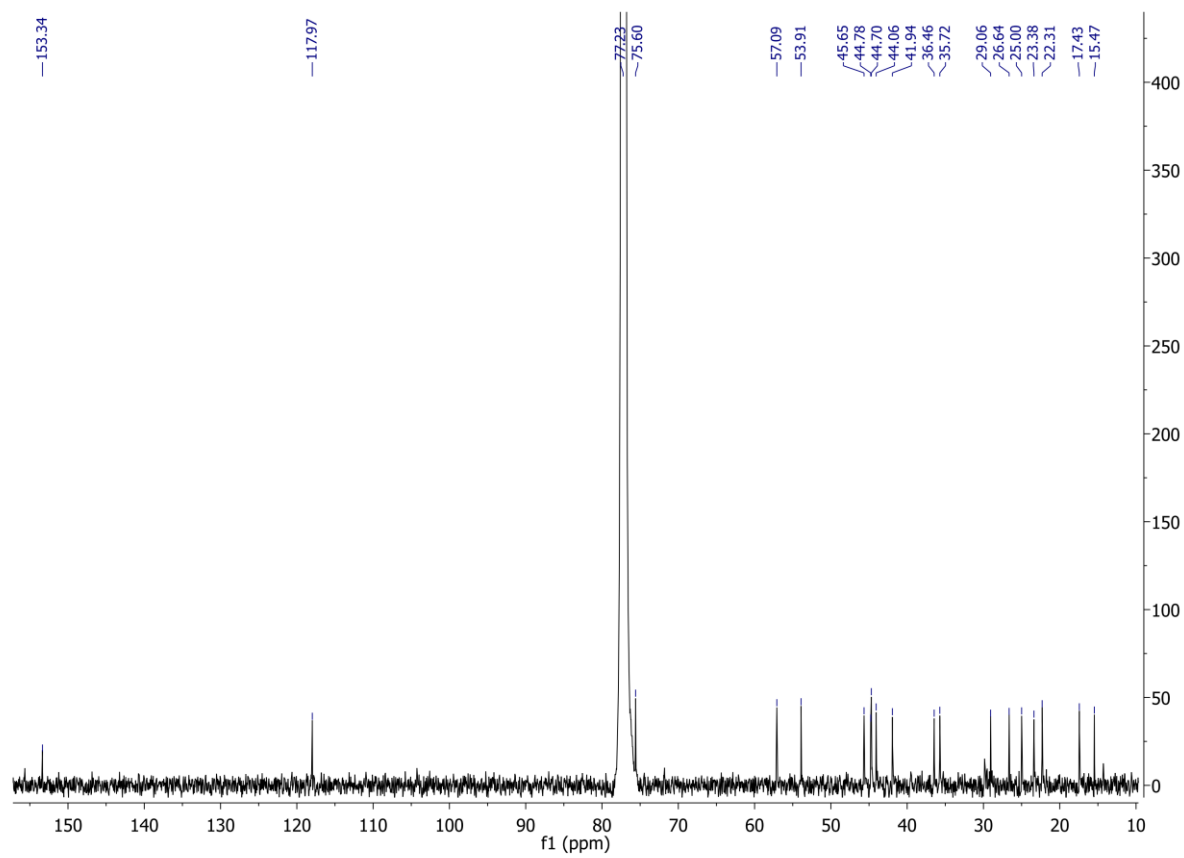

**Figure S3e.**  $^1\text{H}$  NMR (500 MHz,  $\text{CD}_3\text{-OD}$ ) of cyclooctatin.

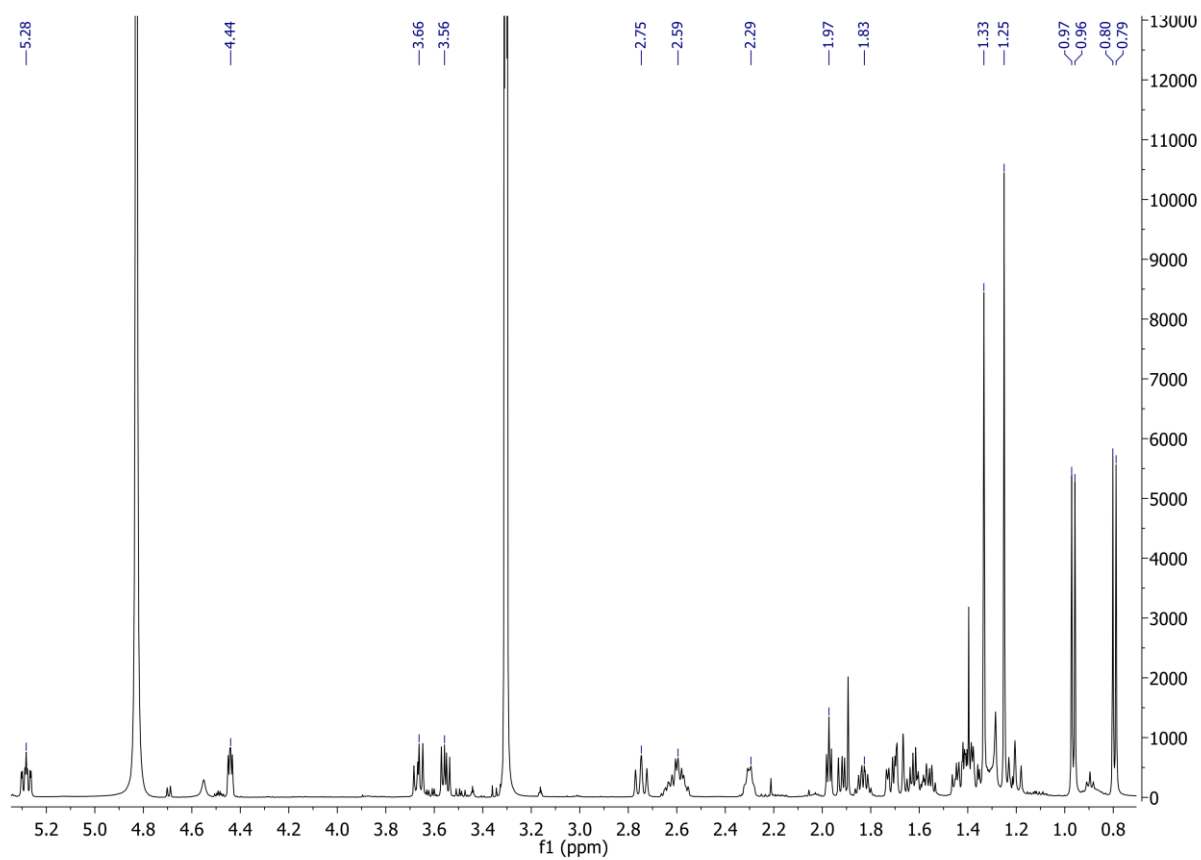

**Figure S3f.**  $^{13}\text{C}$  NMR (125 MHz,  $\text{CD}_3\text{-OD}$ ) of cyclooctatin.

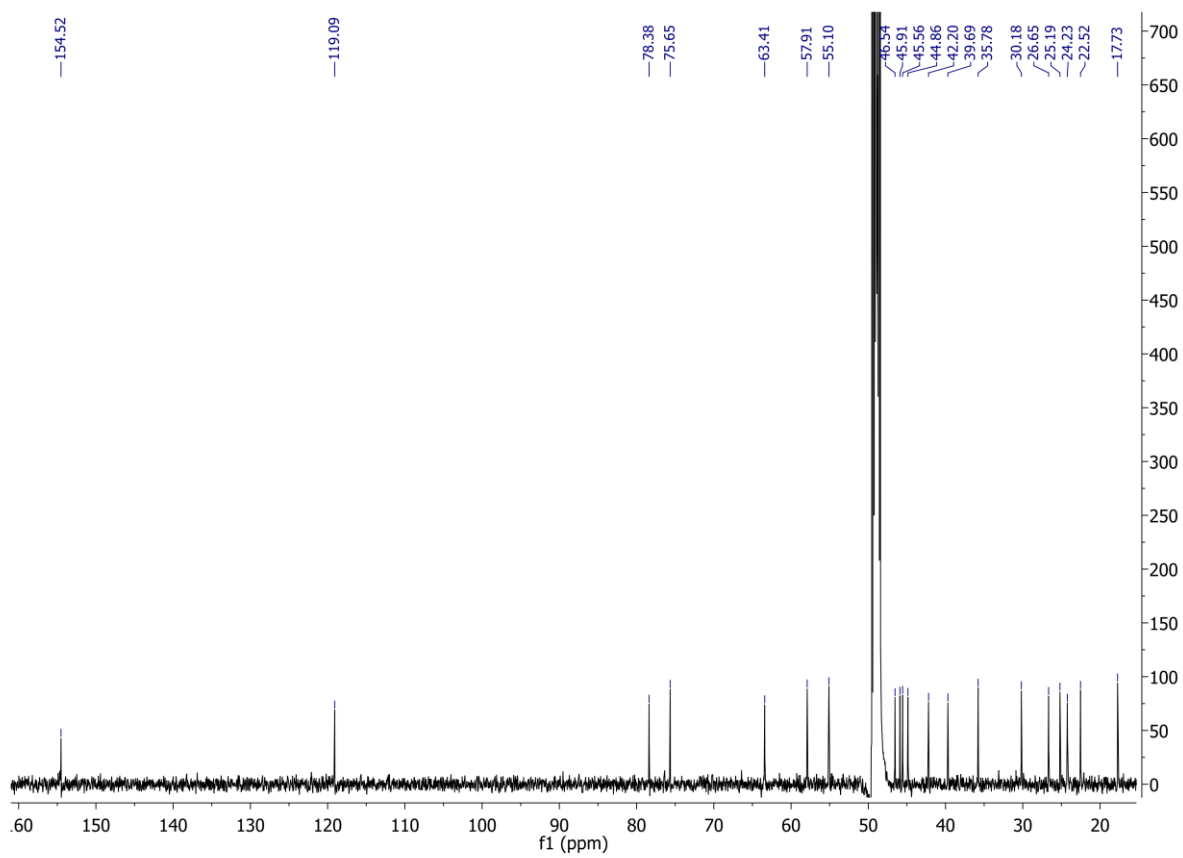

**Figure S3g.** COSY (500 MHz, CD<sub>3</sub>-OD) NMR of cyclooctatin.

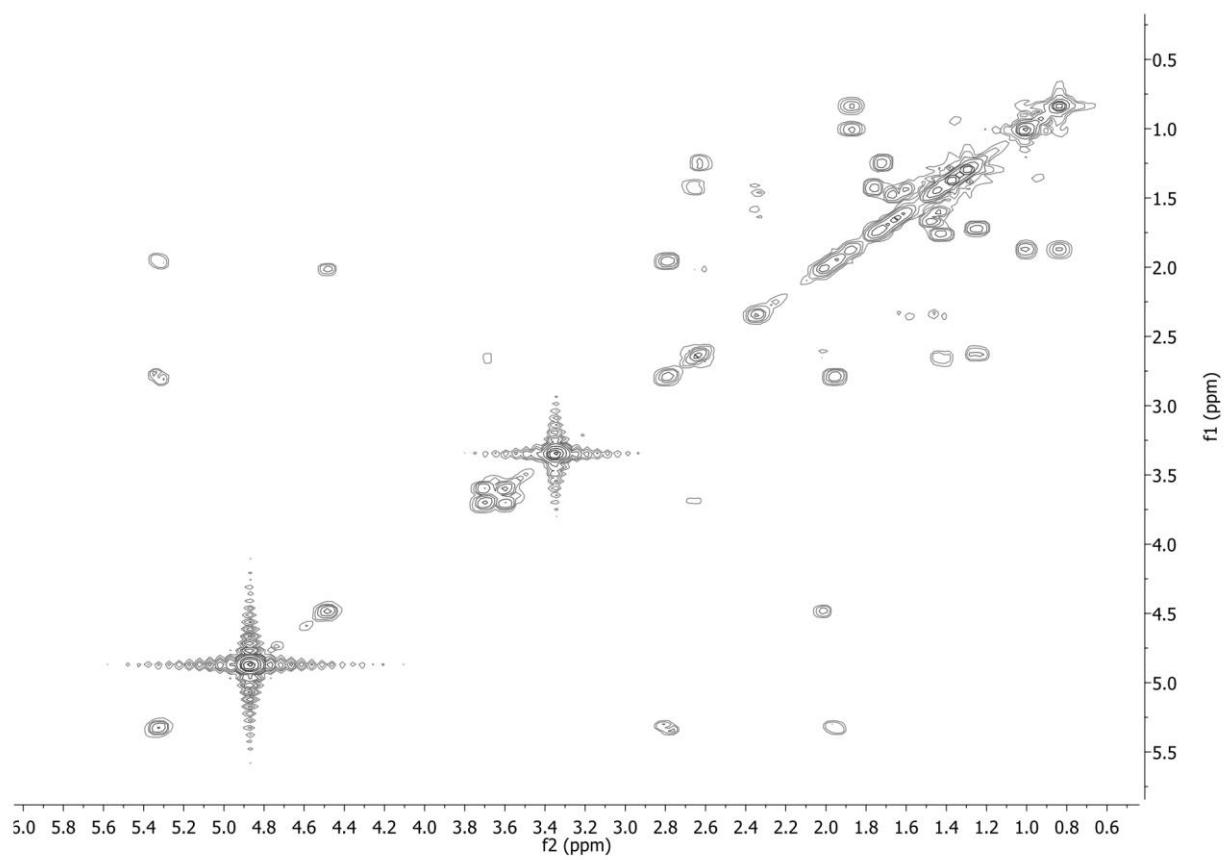

**Figure S3h.** HSQC (500 MHz, CD<sub>3</sub>-OD) NMR of cyclooctatin.

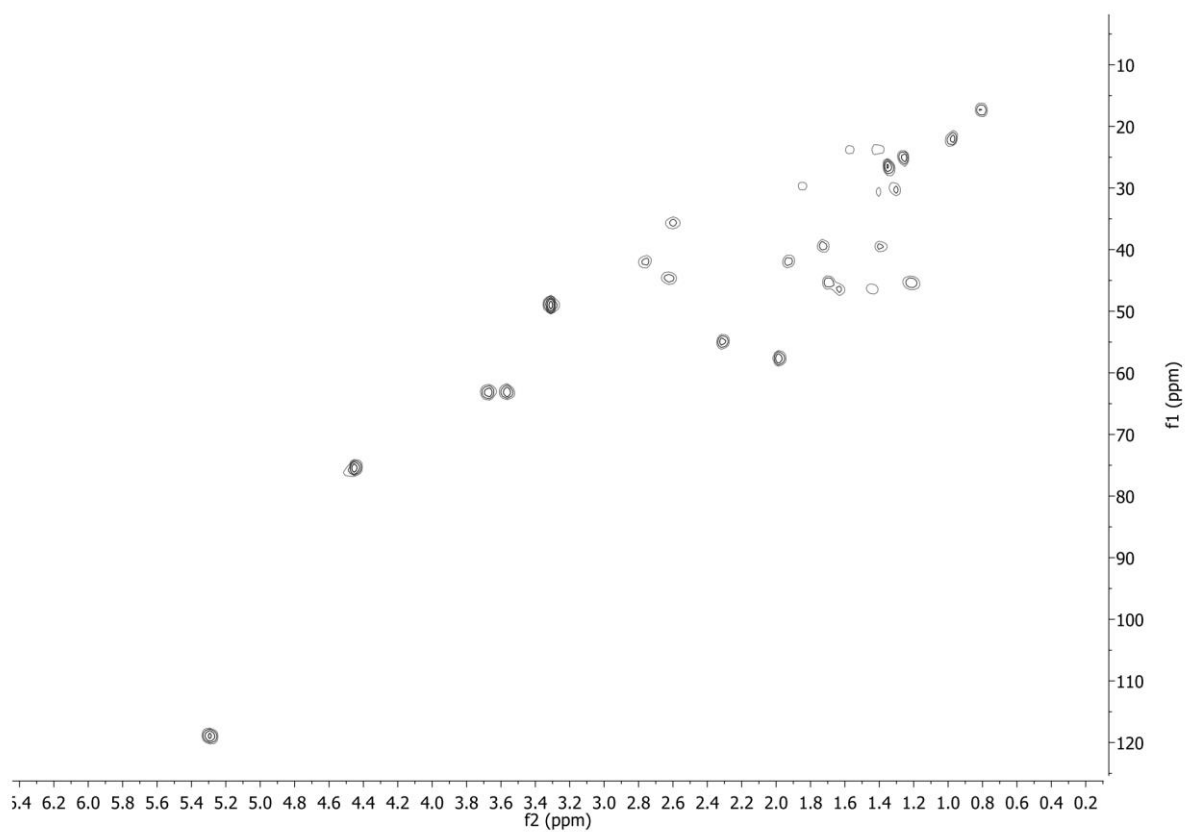



**Figure S3i.** NOESY NMR (500 MHz, CD<sub>3</sub>-OD) of cyclooctatin.

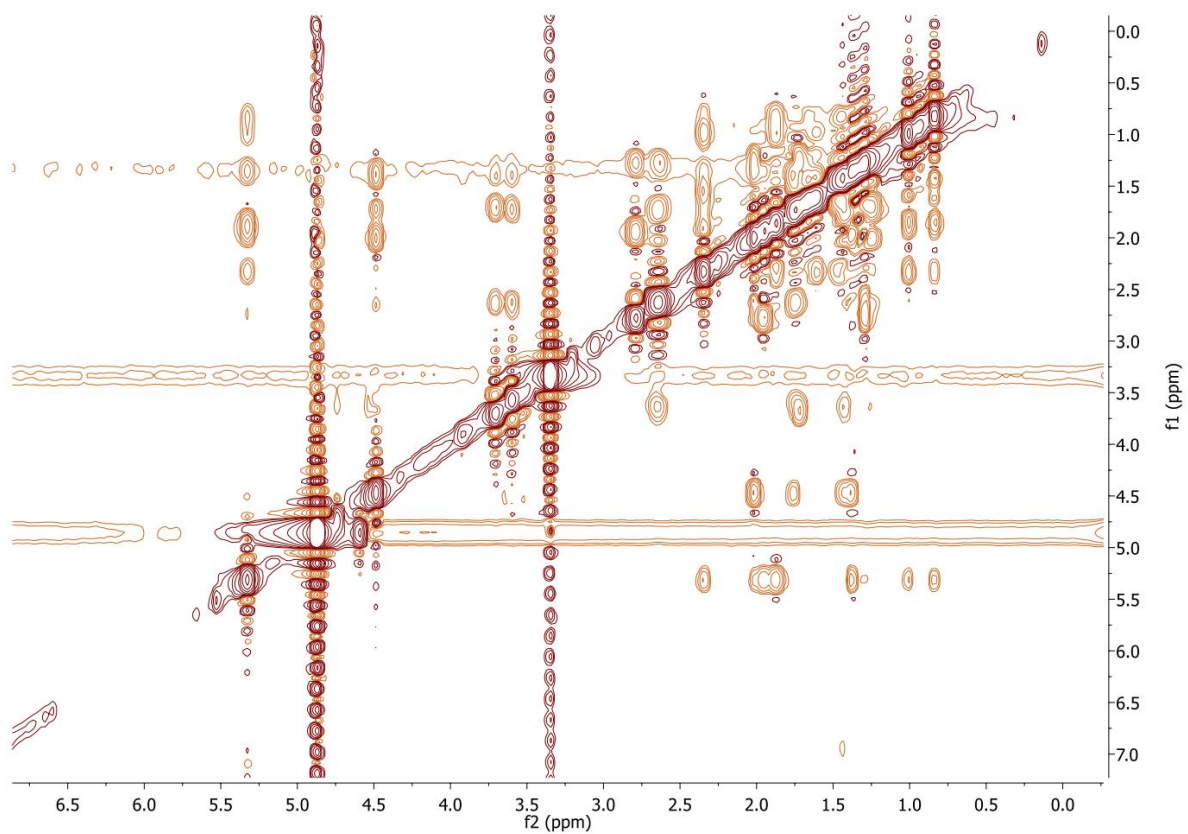

**Figure S3j**  $^1\text{H}$  NMR (500 MHz,  $\text{CDCl}_3$ ) of the C-5 R-MTPA derivative of cyclooctat-9-en-5,7-diol.

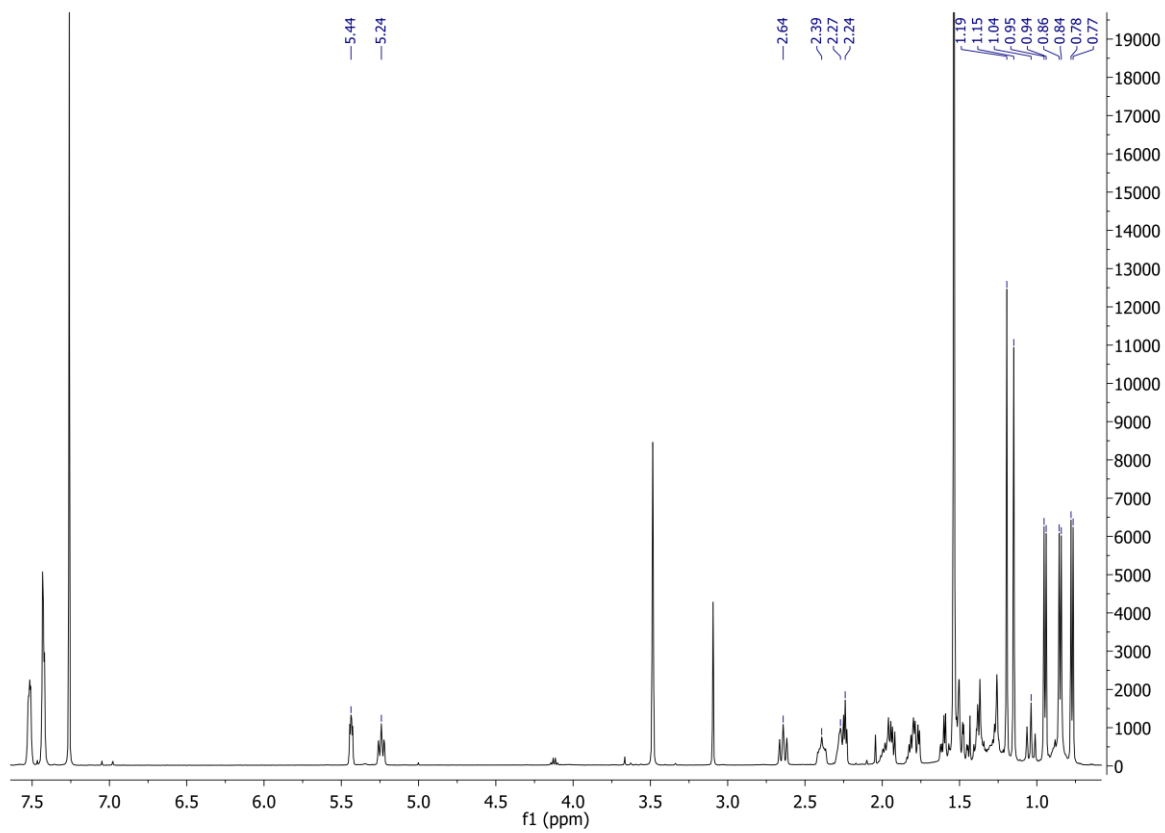

**Figure S3k.**  $^{13}\text{C}$  NMR (125 MHz,  $\text{CDCl}_3$ ) of the C-5 R-MTPA derivative of cyclooctat-9-en-5,7-diol.

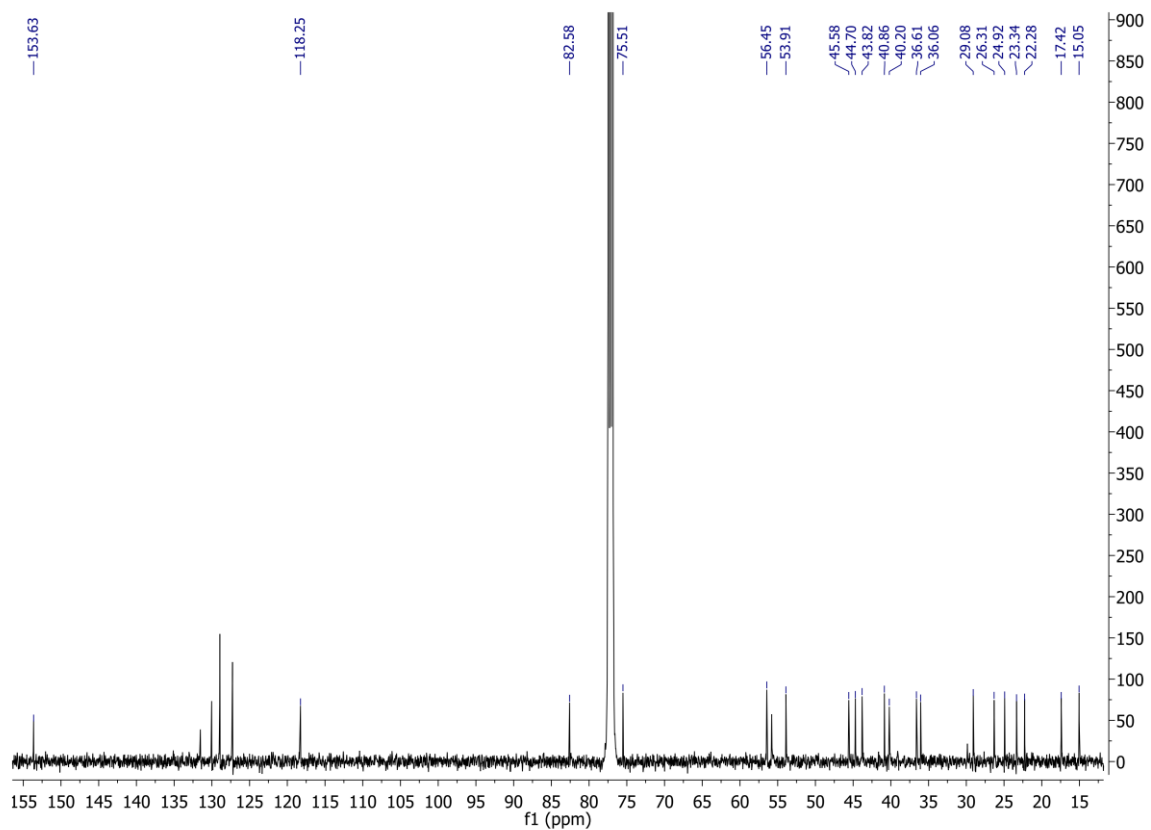

**Figure S31.** COSY NMR (500 MHz,  $\text{CDCl}_3$ ) of the C-5 R-MTPA derivative of cyclooctat-9-en-5,7-diol.

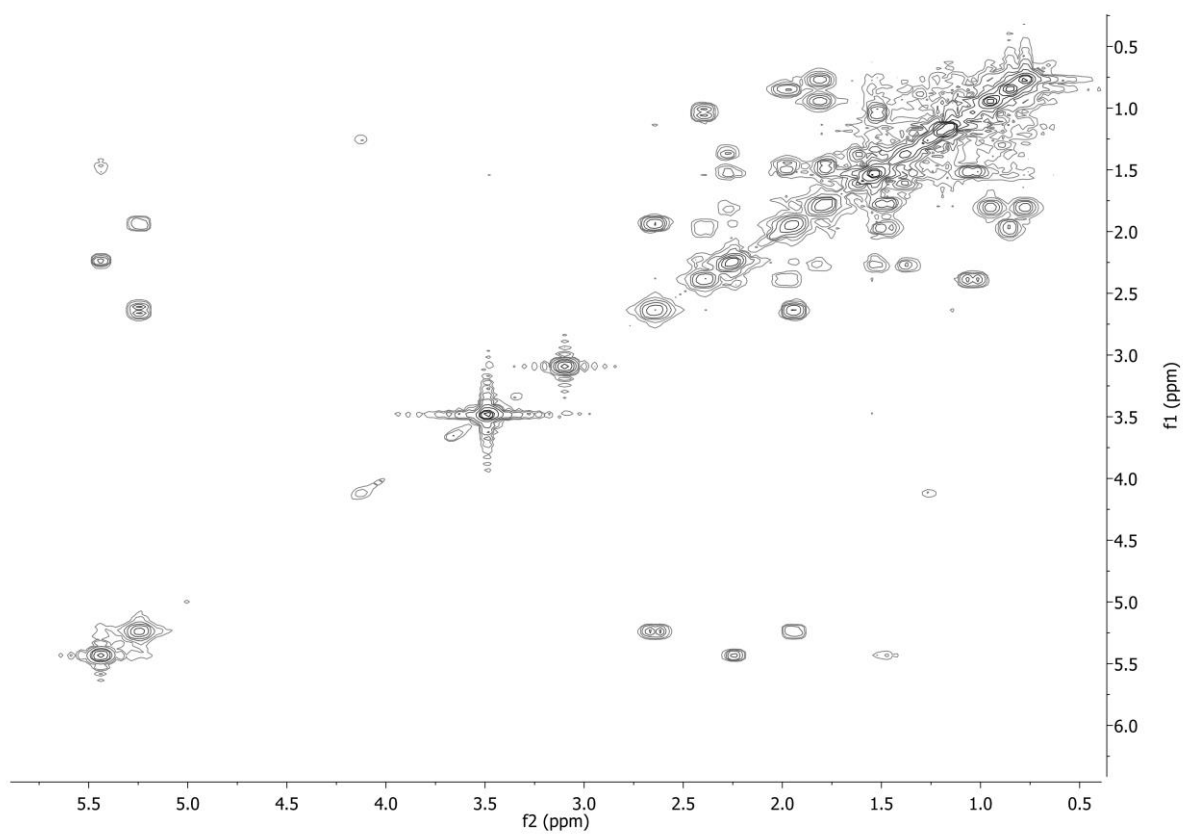

**Figure S3m.** HSQC NMR (500 MHz, CDCl<sub>3</sub>) of the C-5 R-MTPA derivative of cyclooctat-9-en-5,7-diol.

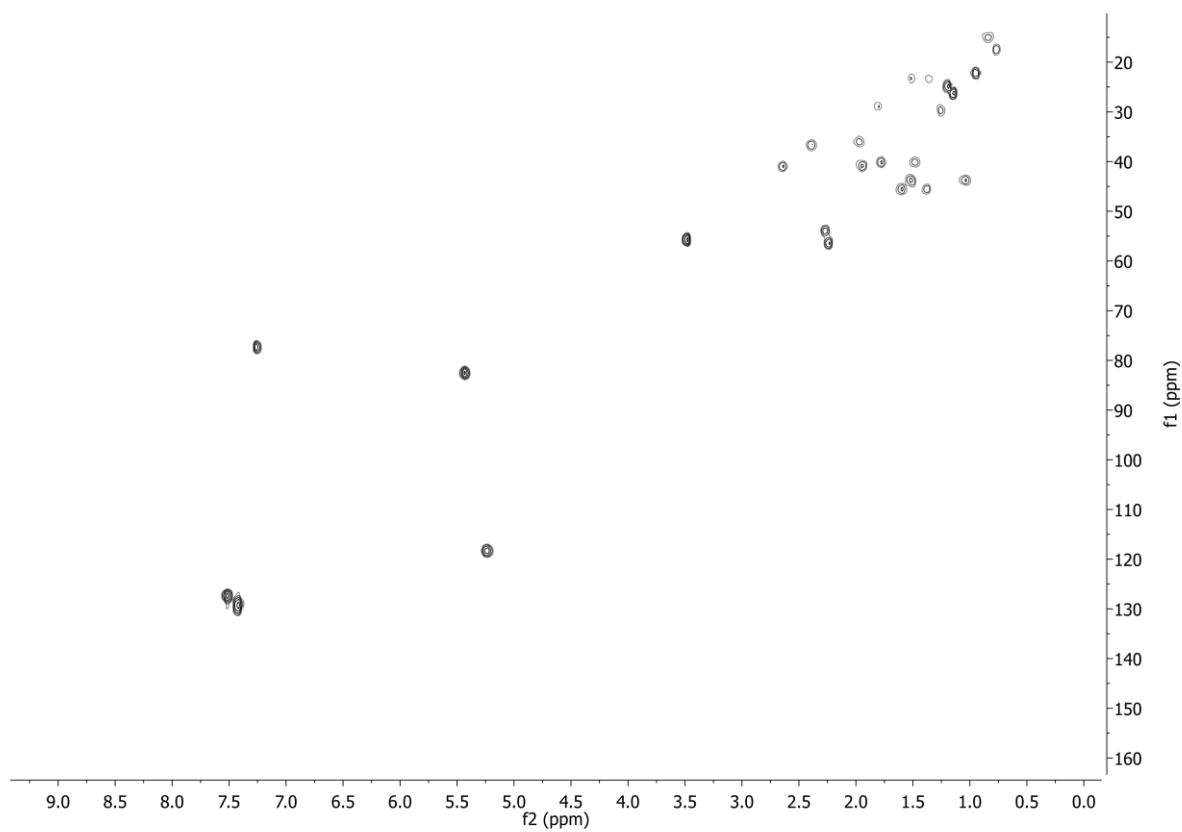

**Figure S3n.** NOESY NMR (500 MHz,  $\text{CDCl}_3$ ) of the C-5 R-MTPA derivative of cyclooctat-9-en-5,7-diol.

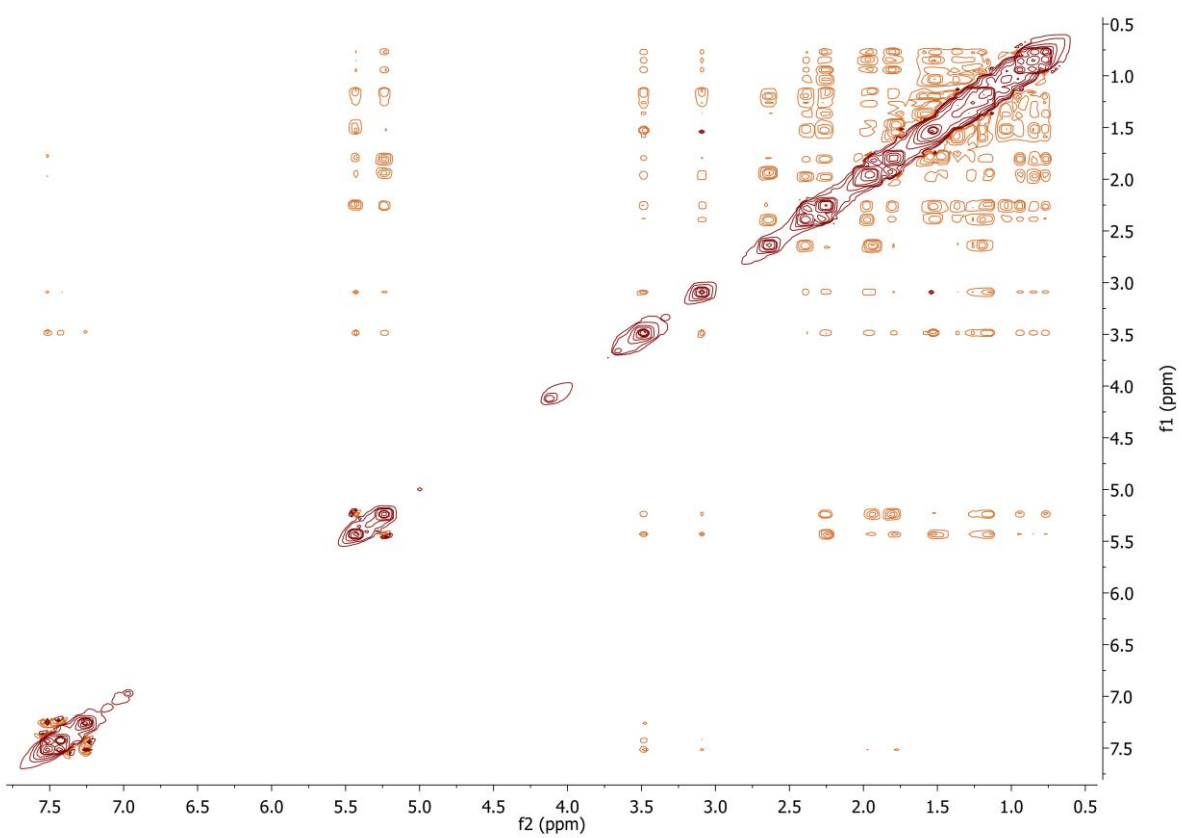

**Figure S3o.**  $^1\text{H}$  NMR (500 MHz,  $\text{CDCl}_3$ ) of the C-5 S-MTPA derivative of cyclooctat-9-en-5,7-diol.

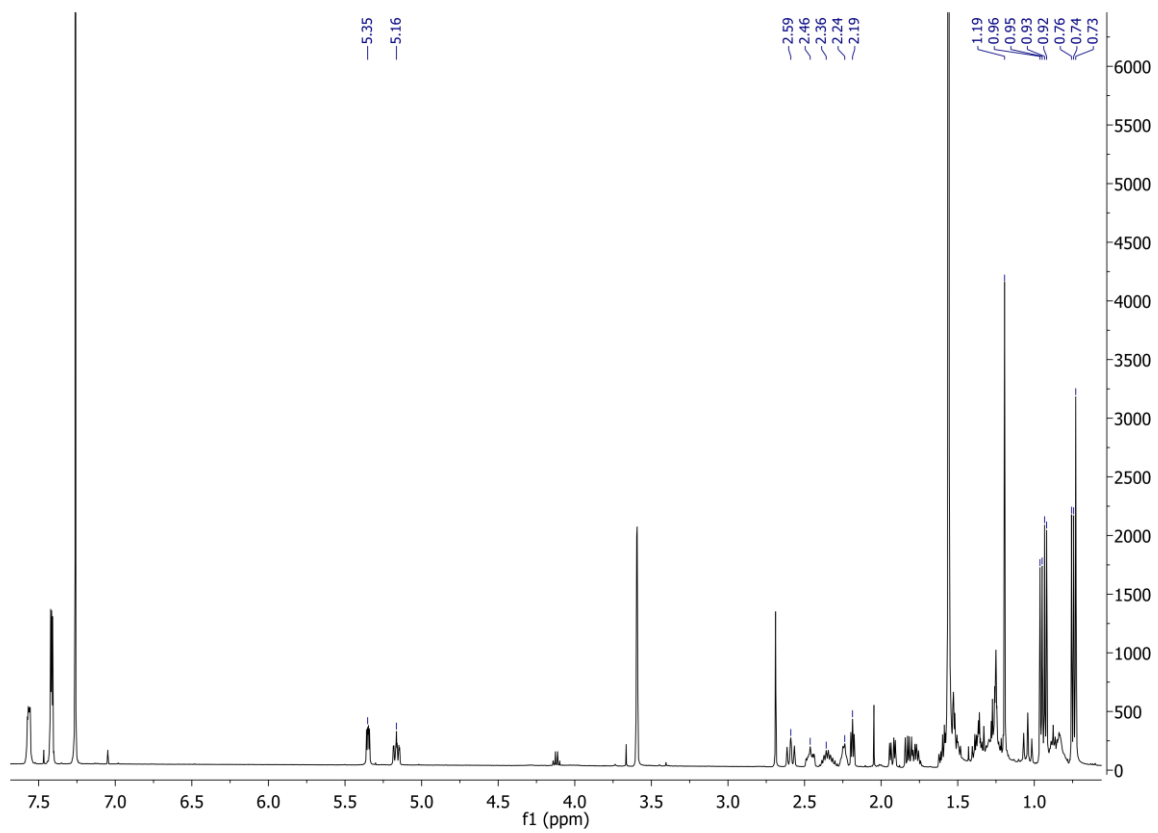

**Figure S3p.**  $^{13}\text{C}$  NMR (125 MHz,  $\text{CDCl}_3$ ) of the C-5 S-MTPA derivative of cyclooctat-9-en-5,7-diol.

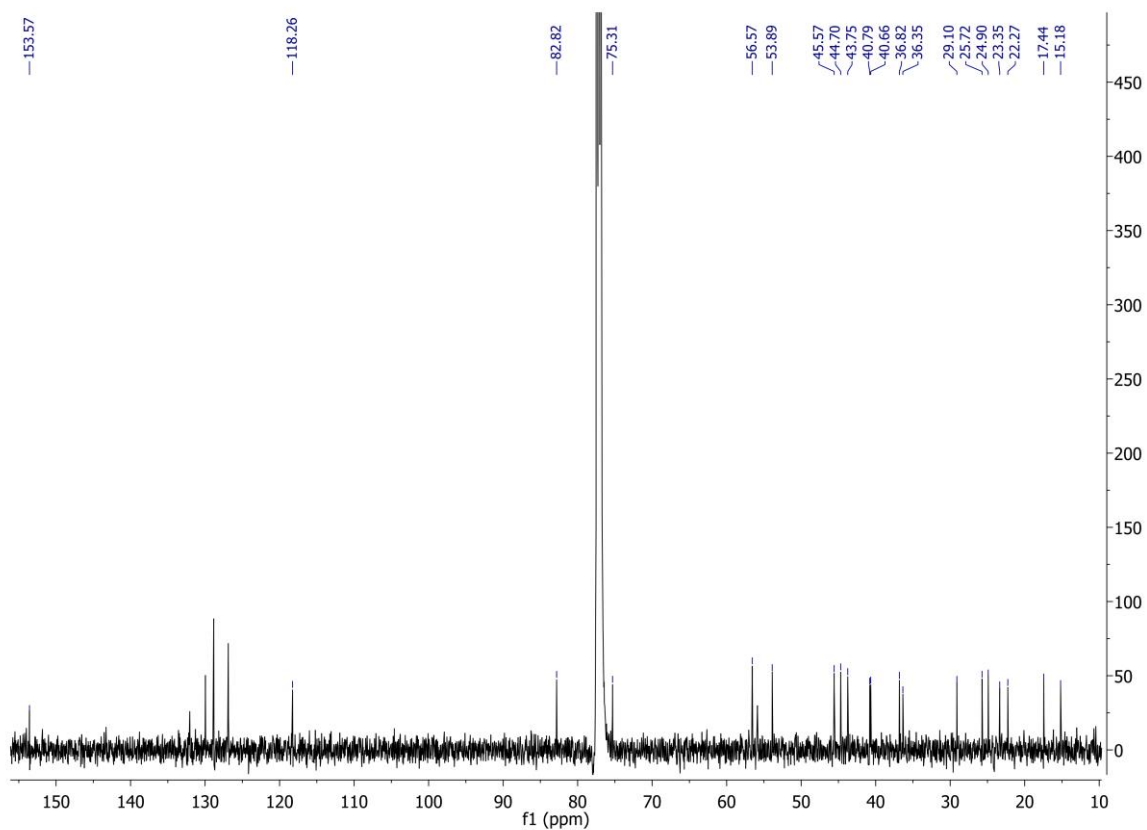



**Figure S3q.** COSY NMR (500 MHz,  $\text{CDCl}_3$ ) of the C-5 S-MTPA derivative of cyclooctat-9-en-5,7-diol.

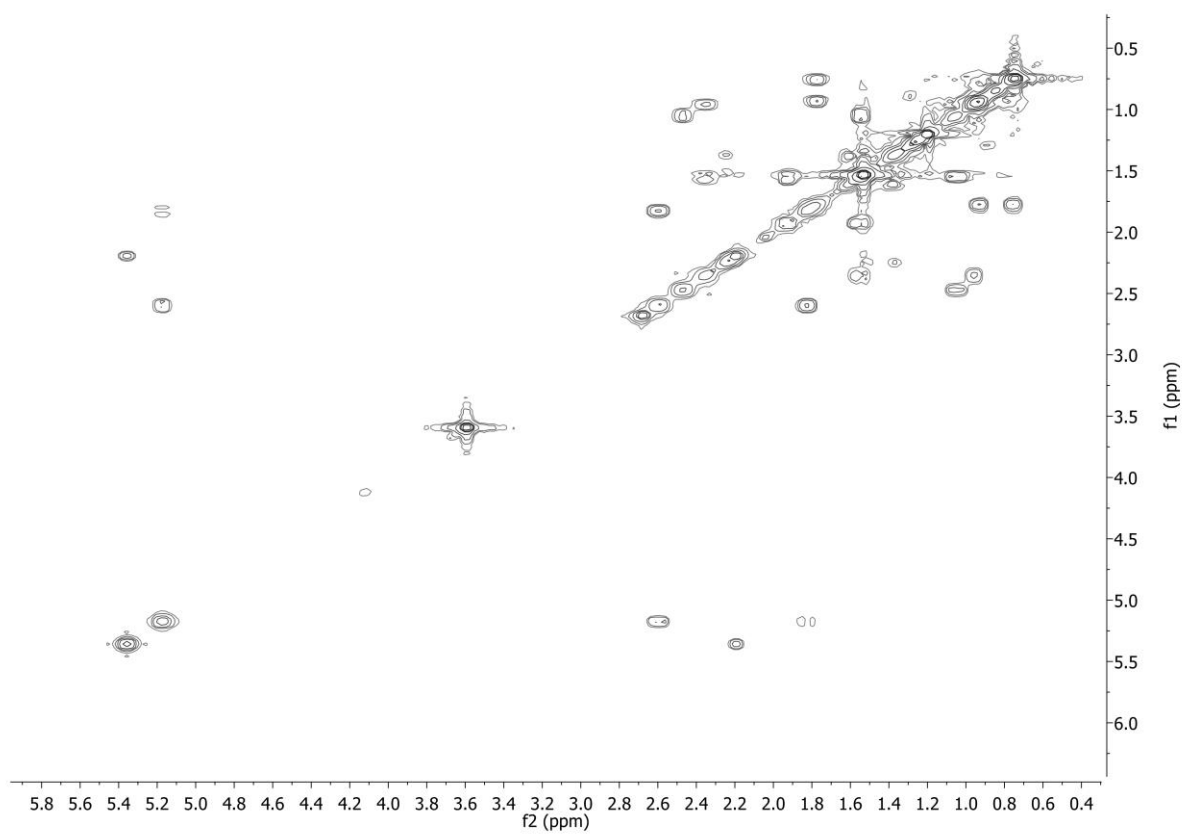

**Figure S3r.** HSQC NMR (500 MHz,  $\text{CDCl}_3$ ) of the C-5 S-MTPA derivative of cyclooctat-9-en-5,7-diol.

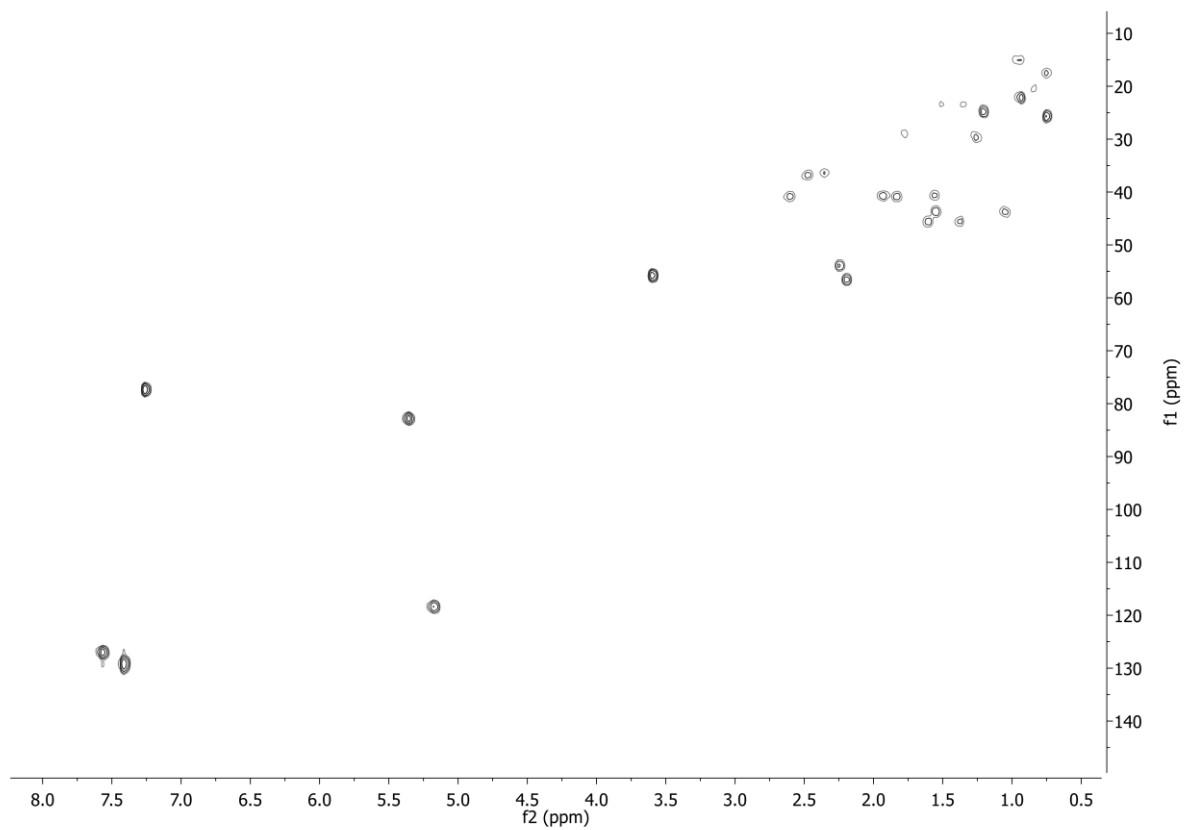

**Figure S3s.** NOESY NMR (500 MHz, CDCl<sub>3</sub>) of the C-5 S-MTPA derivative of cyclooctat-9-en-5,7-diol.

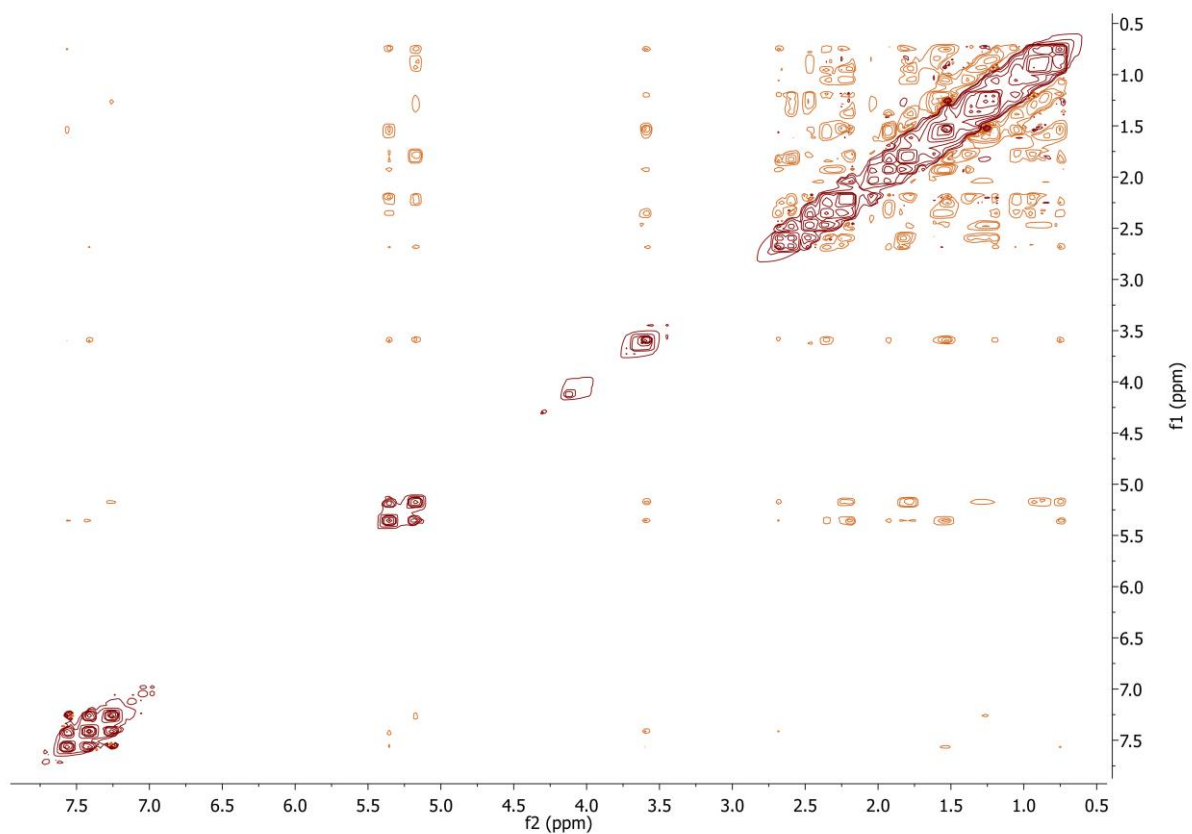

Chiral derivatizing and analysis

**Figure S3t.**  $^1\text{H}$  NMR (500 MHz,  $\text{CDCl}_3$ ) Overlay of the C-5 R/S-MTPA derivatives of cyclooctat-9-en-5,7-diol.

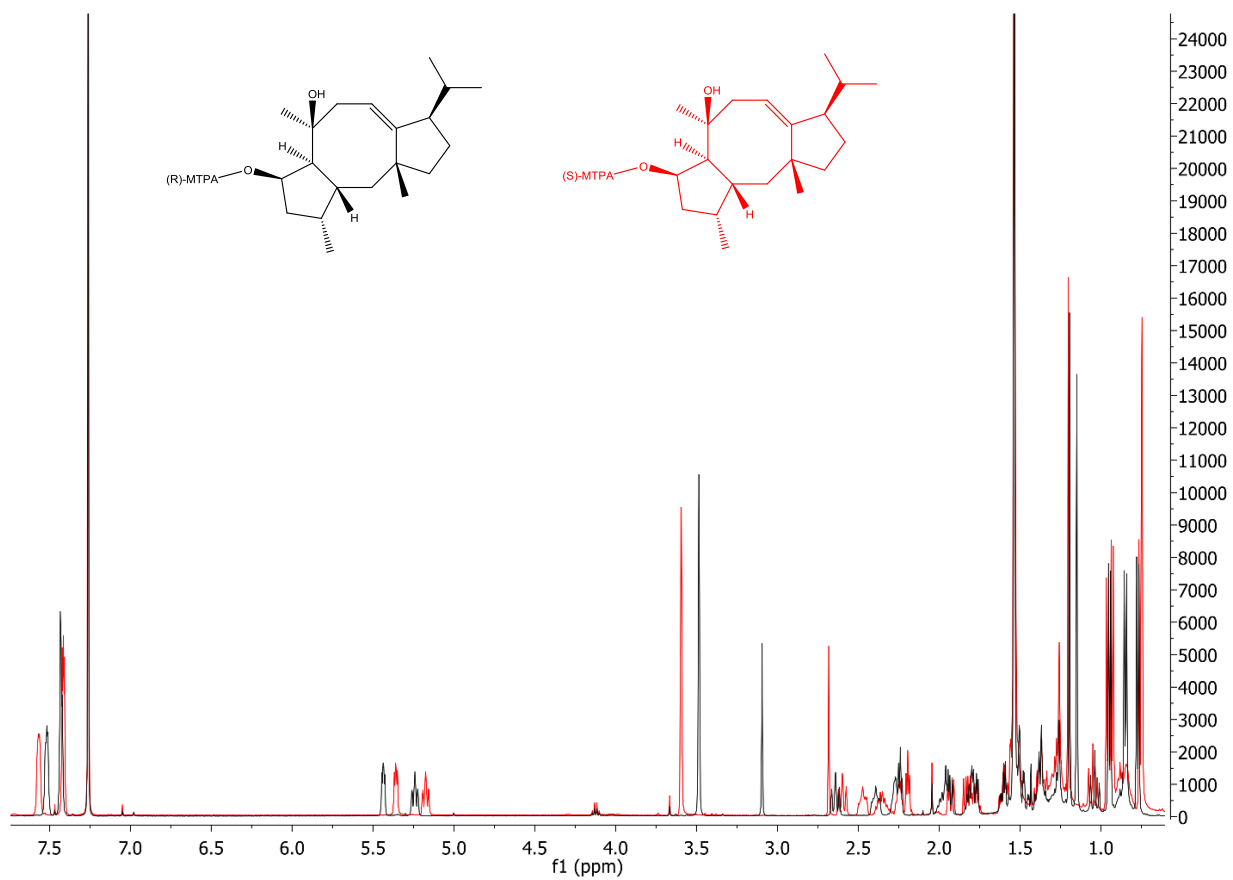

**Table S4.** Experimental  $^1\text{H}$  ( $\text{CDCl}_3$ , 500 MHz,  $\delta_{\text{H}}$ ) and  $^{13}\text{C}$  ( $\text{CDCl}_3$ , 125 MHz,  $\delta_{\text{C}}$ ) NMR data of the C-5 R-MTPA derivatives of cyclooctat-9-en-5,7-diol.

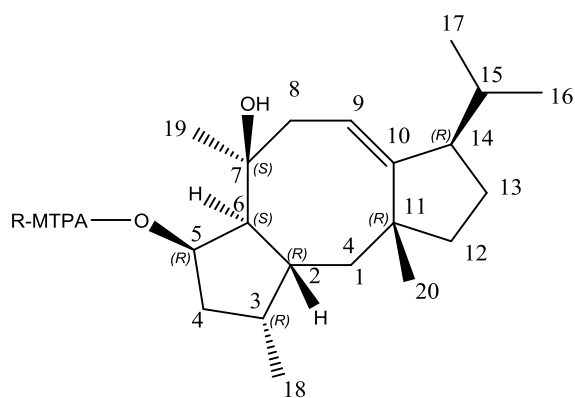

| Position | $\delta_{\text{C}}$ | $\delta_{\text{H}}$ |
|----------|---------------------|---------------------|
| 1        | 43.82               | 1.04, 1.52          |
| 2        | 36.61               | 2.39                |
| 3        | 36.06               | 1.97                |
| 4        | 40.20               | 1.49, 1.78          |
| 5        | 82.58               | 5.43                |
| 6        | 56.45               | 2.24                |
| 7        | 75.51               |                     |
| 8        | 40.86               | 1.94, 2.64          |
| 9        | 118.25              | 5.24                |
| 10       | 153.63              |                     |
| 11       | 44.70               |                     |
| 12       | 45.58               | 1.38, 1.60          |
| 13       | 23.34               | 1.36, 1.51          |
| 14       | 53.91               | 2.27                |
| 15       | 29.09               | 1.26                |
| 16       | 17.42               | 0.77                |
| 17       | 22.28               | 0.95                |
| 18       | 15.05               | 0.84                |
| 19       | 26.31               | 1.14                |
| 20       | 24.92               | 1.19                |

**Table S5.** Experimental  $^1\text{H}$  ( $\text{CDCl}_3$ , 500 MHz,  $\delta_H$ ) and  $^{13}\text{C}$  ( $\text{CDCl}_3$ , 125 MHz,  $\delta_C$ ) NMR data of the C-5 S-MTPA derivatives of cyclooctat-9-en-5,7-diol.

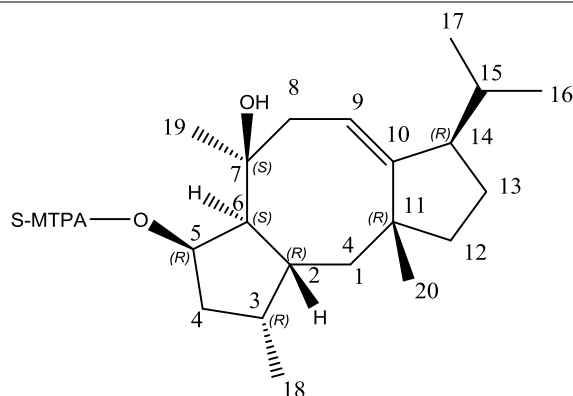

| Position  | $\delta_C$ | $\delta_H$ |
|-----------|------------|------------|
| <b>1</b>  | 43.75      | 1.04, 1.55 |
| <b>2</b>  | 36.82      | 2.48       |
| <b>3</b>  | 36.35      | 2.35       |
| <b>4</b>  | 40.66      | 1.56, 1.93 |
| <b>5</b>  | 82.82      | 5.36       |
| <b>6</b>  | 56.57      | 2.19       |
| <b>7</b>  | 75.31      |            |
| <b>8</b>  | 40.79      | 1.83, 2.60 |
| <b>9</b>  | 118.26     | 5.17       |
| <b>10</b> | 153.57     |            |
| <b>11</b> | 44.7       |            |
| <b>12</b> | 45.57      | 1.37, 1.60 |
| <b>13</b> | 23.35      | 1.35, 1.51 |
| <b>14</b> | 53.89      | 2.25       |
| <b>15</b> | 29.10      | 1.26       |
| <b>16</b> | 17.44      | 0.75       |
| <b>17</b> | 22.27      | 0.93       |
| <b>18</b> | 15.18      | 0.95       |
| <b>19</b> | 25.72      | 0.75       |
| <b>20</b> | 24.9       | 1.21       |

**Figure S4.**  $\Delta\delta$  (S – R) values (ppm) for the C-5 MTPA derivatives of cyclooctat-9-en-5,7-diol.

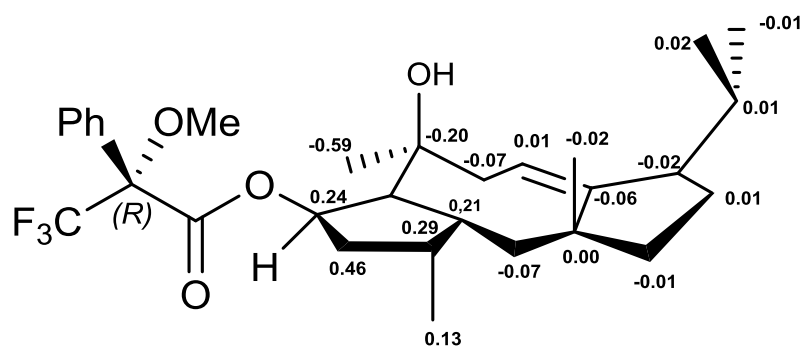

<sup>13</sup>C-NMR  $\Delta\delta$  (S – R) values (ppm)

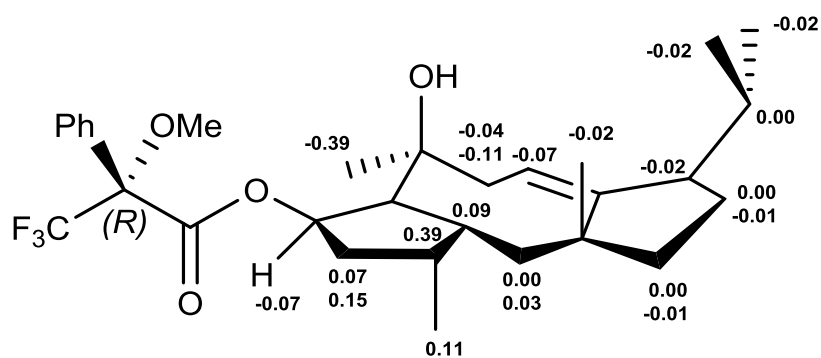

<sup>1</sup>H-NMR  $\Delta\delta$  (S – R) values (ppm)

**Figure S5a.**  $^1\text{H}$  NMR (500 MHz,  $\text{CDCl}_3$ ) of (-)-Casbene.

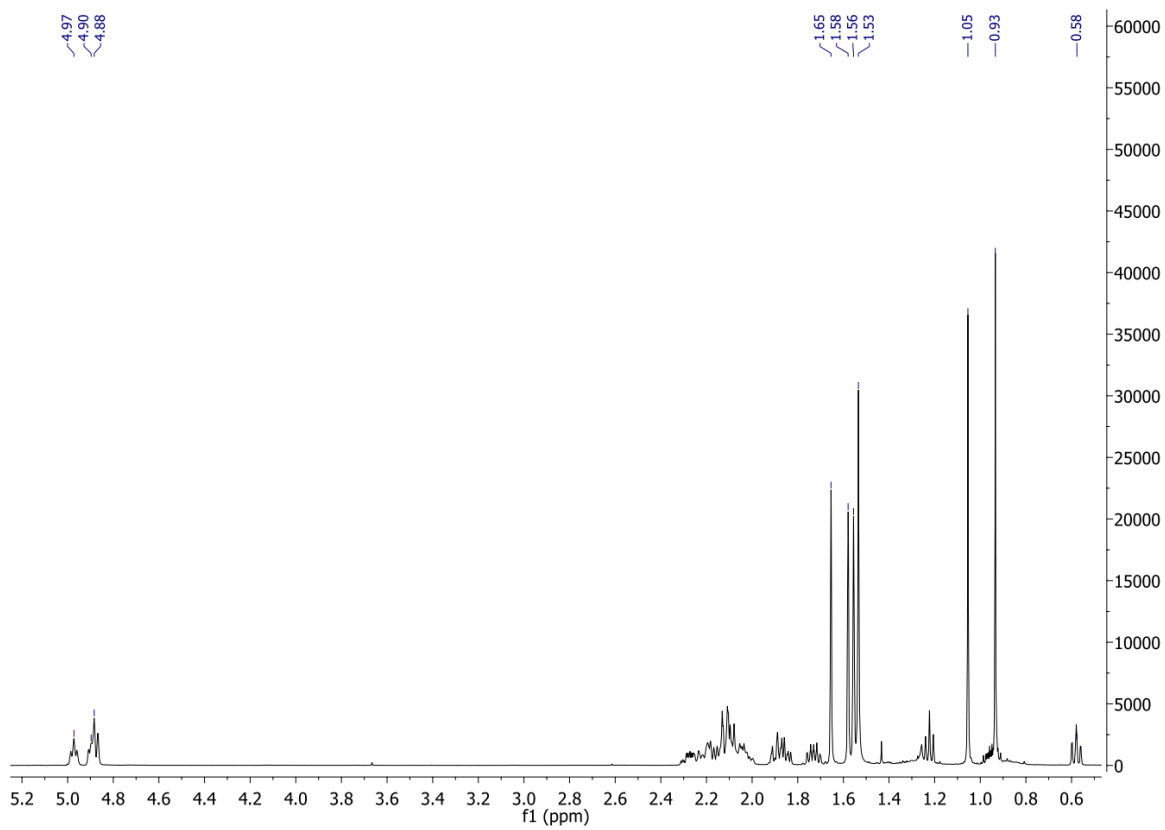



**Figure S5b.**  $^{13}\text{C}$  NMR (125 MHz,  $\text{CDCl}_3$ ) of (-)-Casbene.

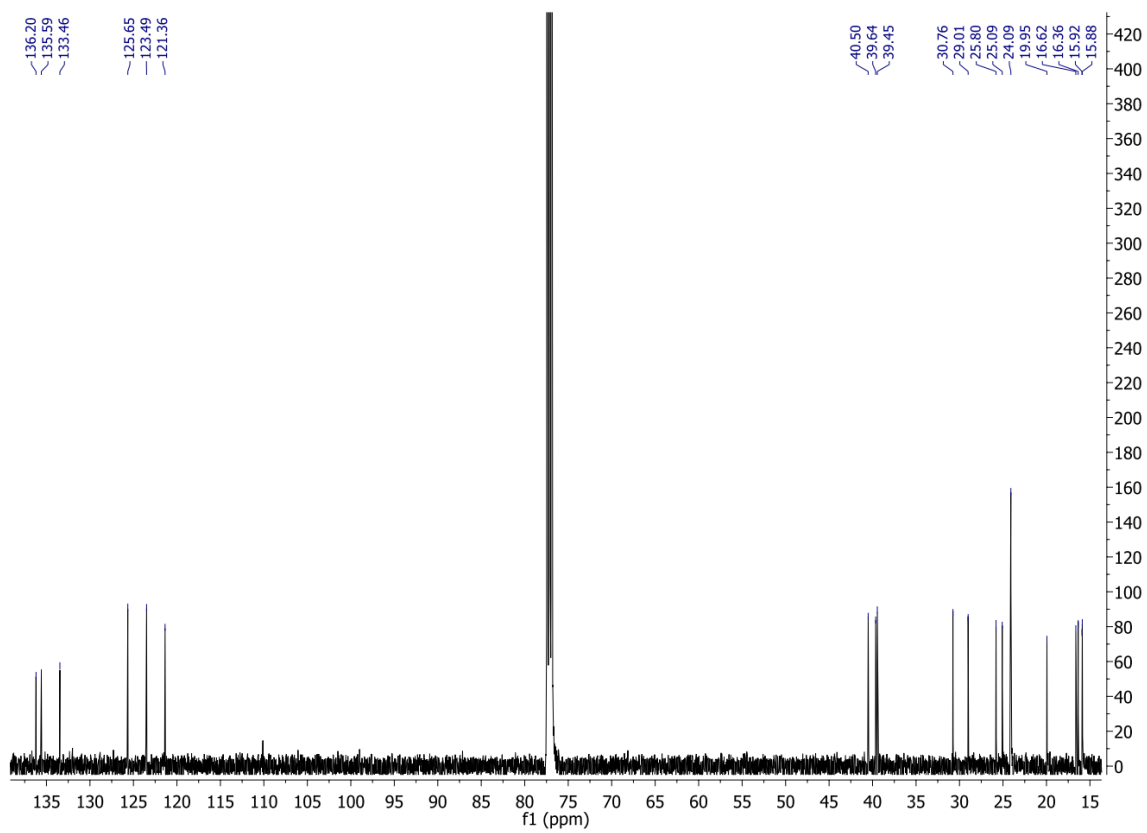

**Table S6.** Experimental  $^1\text{H}$  ( $\text{CDCl}_3$ , 500 MHz,  $\delta_{\text{H}}$ ,  $J$  in Hz) and  $^{13}\text{C}$  ( $\text{CDCl}_3$ , 125 MHz,  $\delta_{\text{C}}$ ) NMR data of sinularcasbane D.

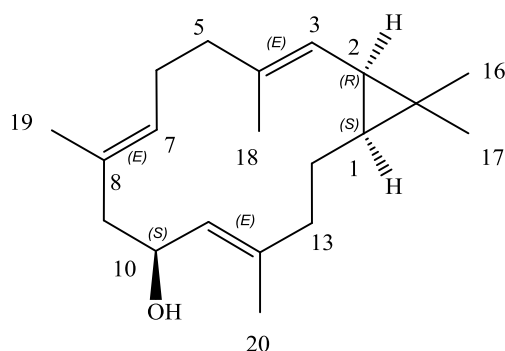

| Position | $\delta_{\text{C}}$      | $\delta_{\text{H}}$       |
|----------|--------------------------|---------------------------|
| 1        | 30.80 (CH)               | 0.65 ddd (10.5, 8.7, 1.7) |
| 2        | 25.97 (CH)               | 1.21 t (8.5)              |
| 3        | 121.41 (CH)              | 4.84 d (8.3)              |
| 4        | 135.89 (C)               |                           |
| 5        | 39.57 (CH <sub>2</sub> ) | 2.19 (m)<br>2.06 (m)      |
| 6        | 25.09 (CH <sub>2</sub> ) | 2.19 (m)<br>2.05 (m)      |
| 7        | 127.09 (CH)              | 4.87 ddd (6.7, 4.4, 1.2)  |
| 8        | 130.95 (C)               |                           |
| 9        | 48.15 (CH <sub>2</sub> ) | 2.35 (m)<br>2.08 (m)      |
| 10       | 67.00 (CH)               | 4.52 ddd (10.7, 9.1, 3.2) |
| 11       | 127.01 (CH)              | 4.98 dq (9.2, 1.4)        |
| 12       | 140.31 (C)               |                           |
| 13       | 39.70 (CH <sub>2</sub> ) | 2.24 (m)<br>1.81 (m)      |
| 14       | 24.03 (CH <sub>2</sub> ) | 1.68 (m)<br>1.13 (m)      |
| 15       | 20.16 (C)                |                           |
| 16       | 29.06 (CH <sub>3</sub> ) | 1.07 (s)                  |
| 17       | 15.74 (CH <sub>3</sub> ) | 0.96 (s)                  |
| 18       | 16.08 (CH <sub>3</sub> ) | 1.62 (s)                  |
| 19       | 17.25 (CH <sub>3</sub> ) | 1.59 (s)                  |
| 20       | 18.72 (CH <sub>3</sub> ) | 1.66 (s)                  |

**Figure S6.** COSY and HMBC correlations of sinularcasbane D.

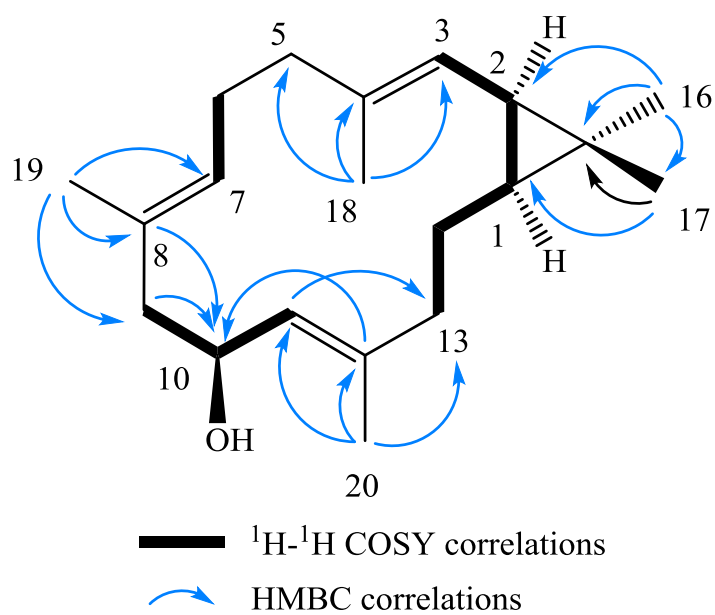

**Figure S7.** Illustrated NOESY correlations of sinularcasbane D. Modelling was done using molecular mechanics (MM2) calculations with ChemDraw Ultra Ver. 13.0 (CambridgeSoft).

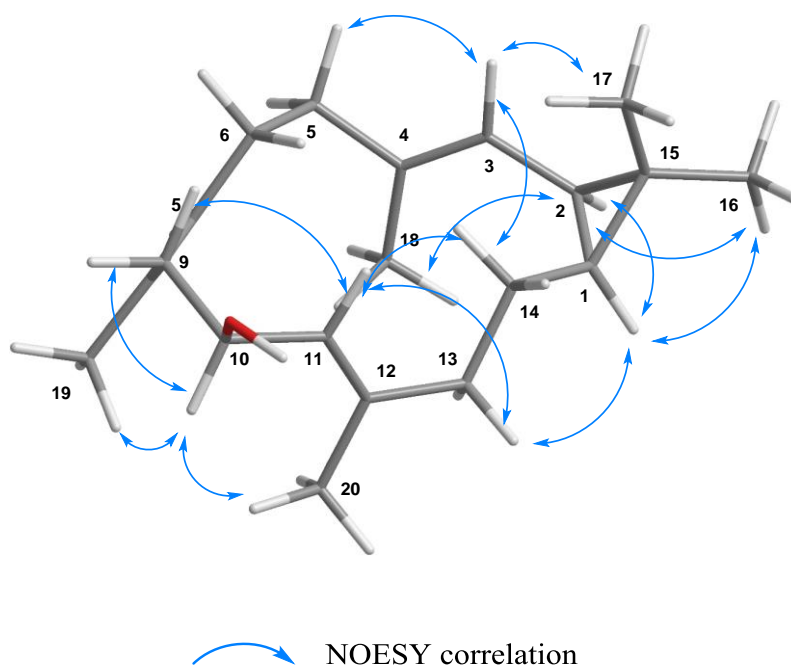

**Figure S8a.**  $^1\text{H}$  NMR (500 MHz,  $\text{CDCl}_3$ ) of sinularcasbane D.

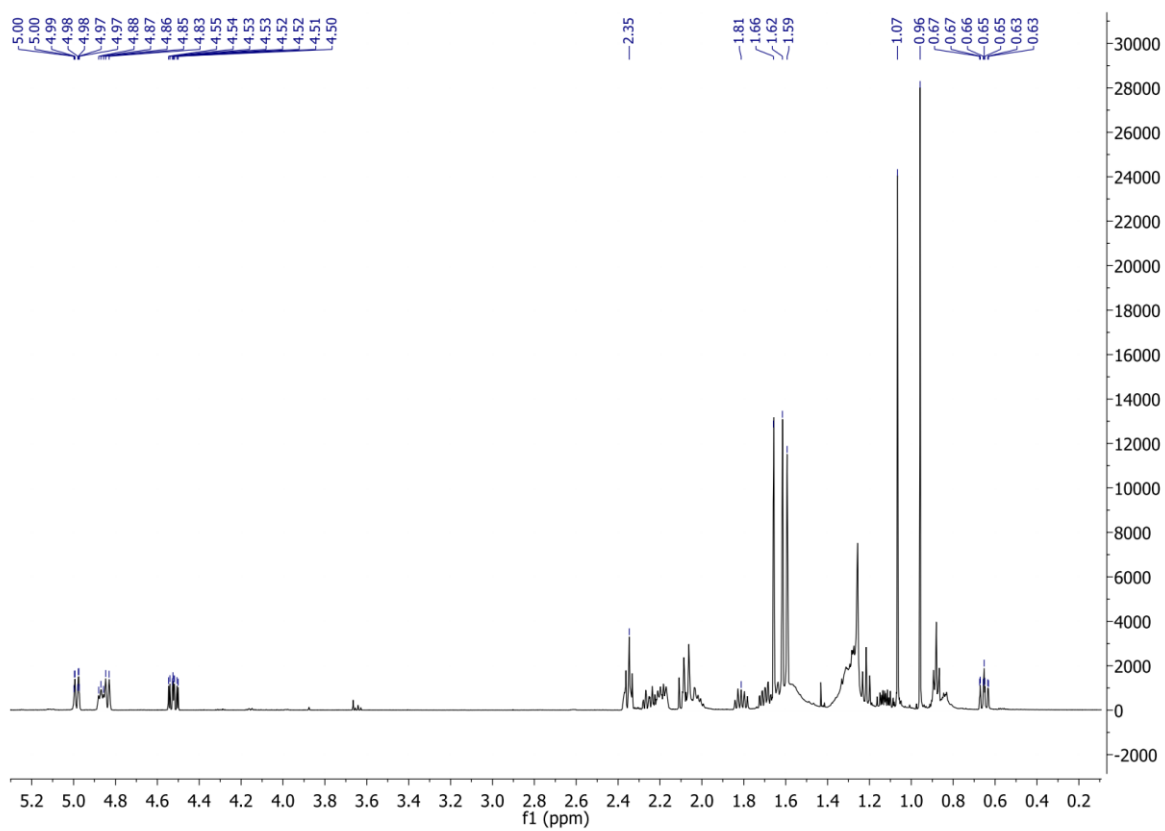

**Figure S8b.**  $^1\text{H}$  NMR (500 MHz,  $\text{CDCl}_3$ ) of sinularcasbane D.

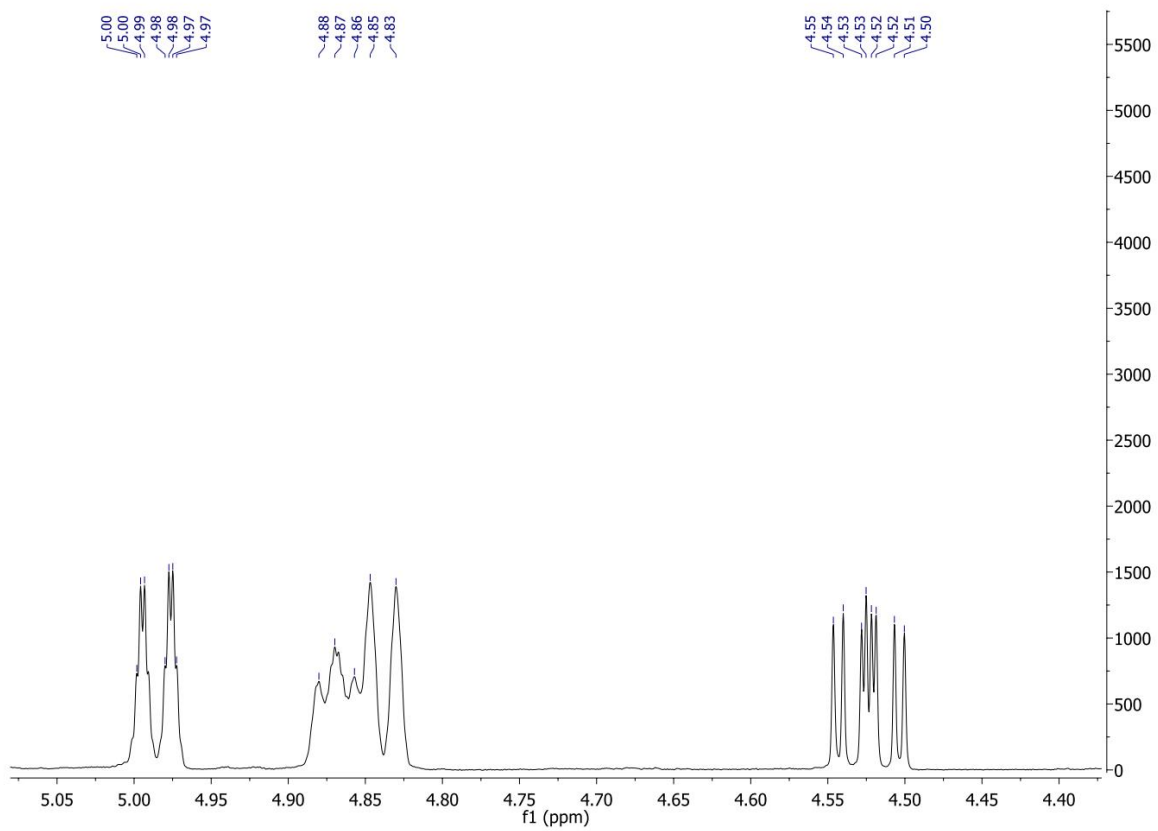

**Figure S8c.**  $^{13}\text{C}$  NMR (125 MHz,  $\text{CDCl}_3$ ) of sinularcasbane D.

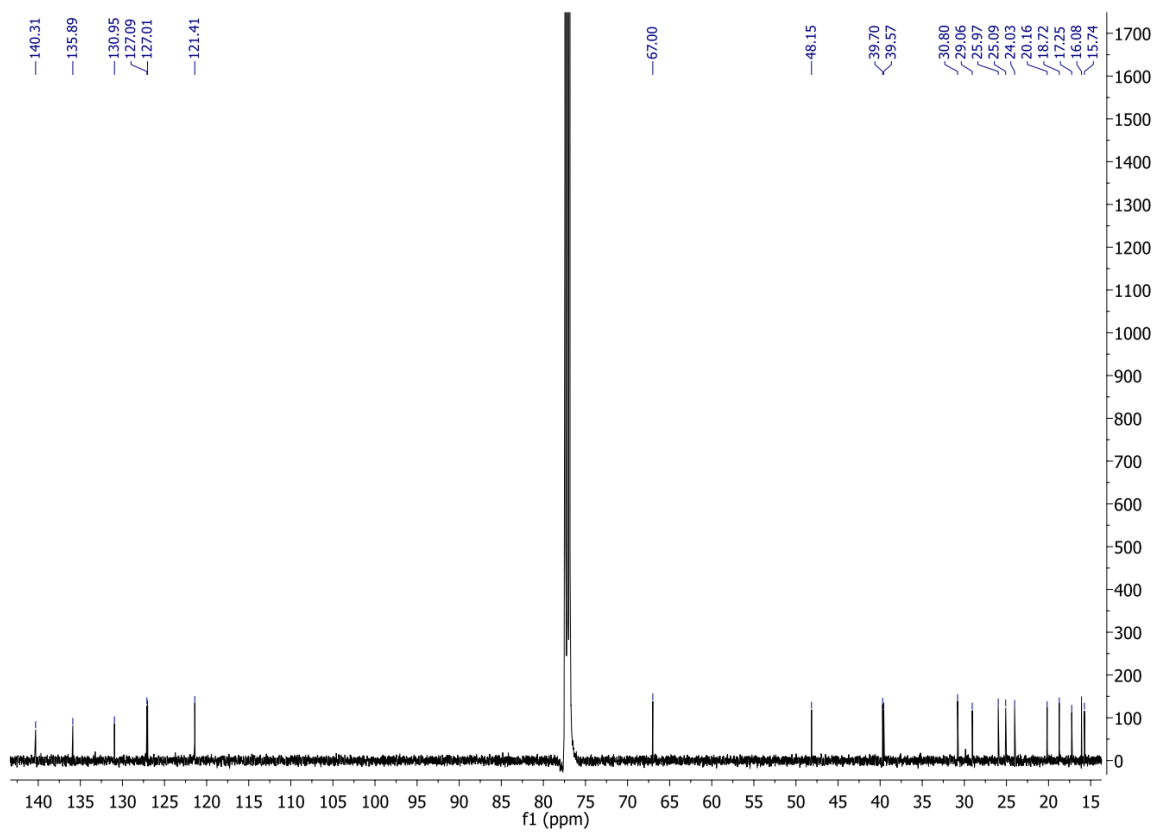

**Figure S8d.** COSY NMR (500 MHz, CDCl<sub>3</sub>) of sinularcasbane D.

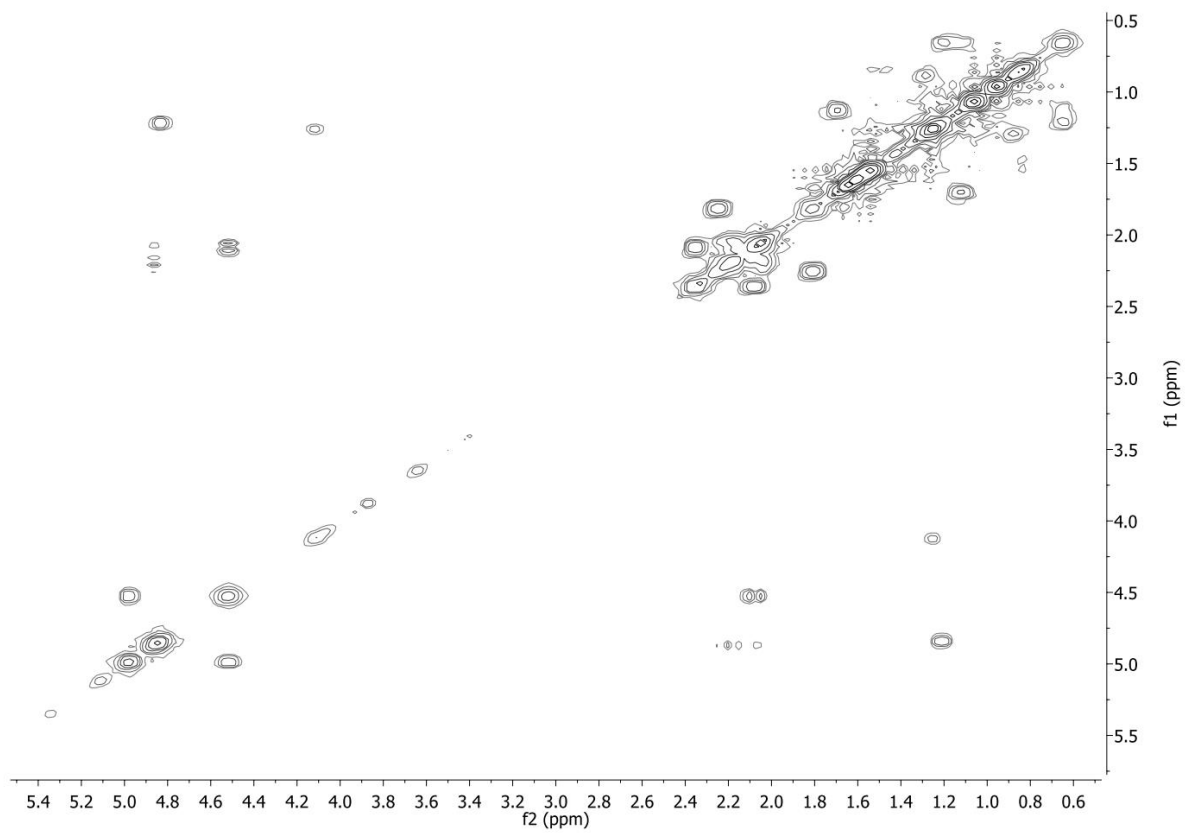

**Figure S8e.** HSQC NMR (500 MHz, CDCl<sub>3</sub>) of sinularcasbane D.

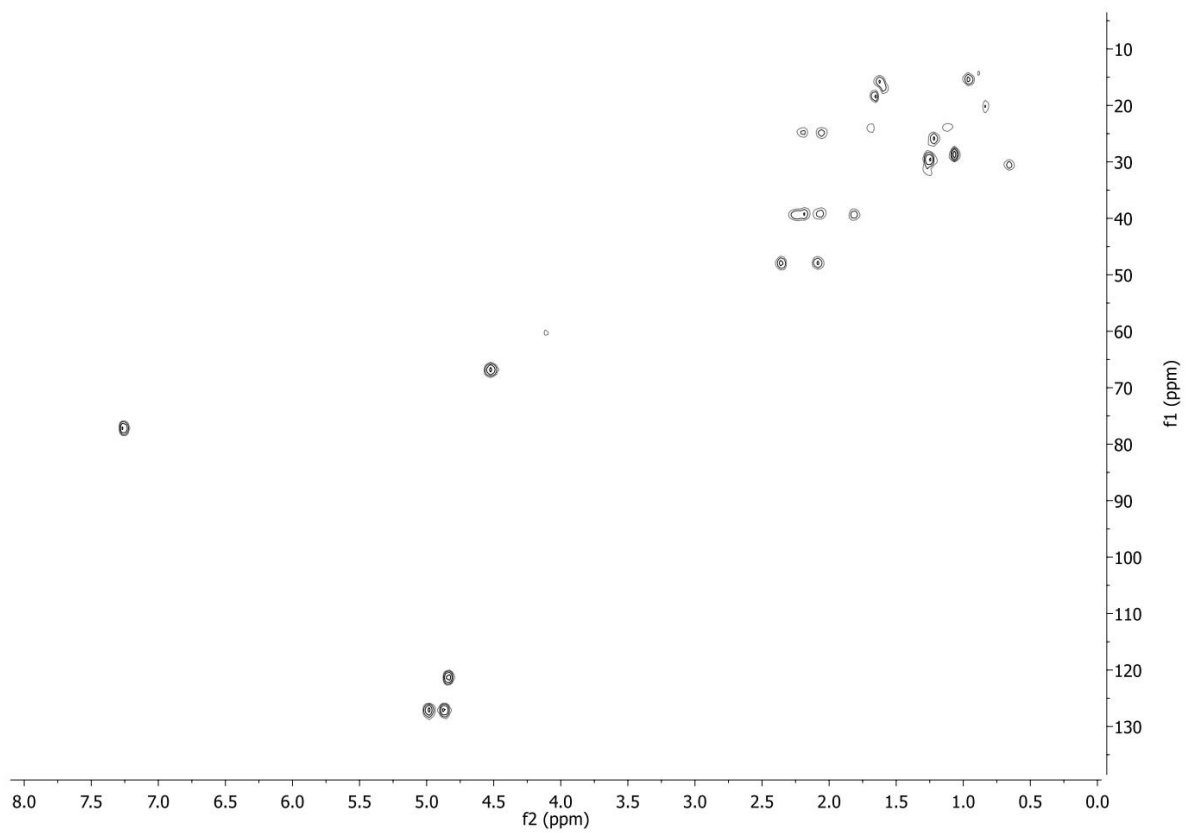



**Figure S8f.** HMBC NMR (500 MHz, CDCl<sub>3</sub>) of sinularcasbane D.

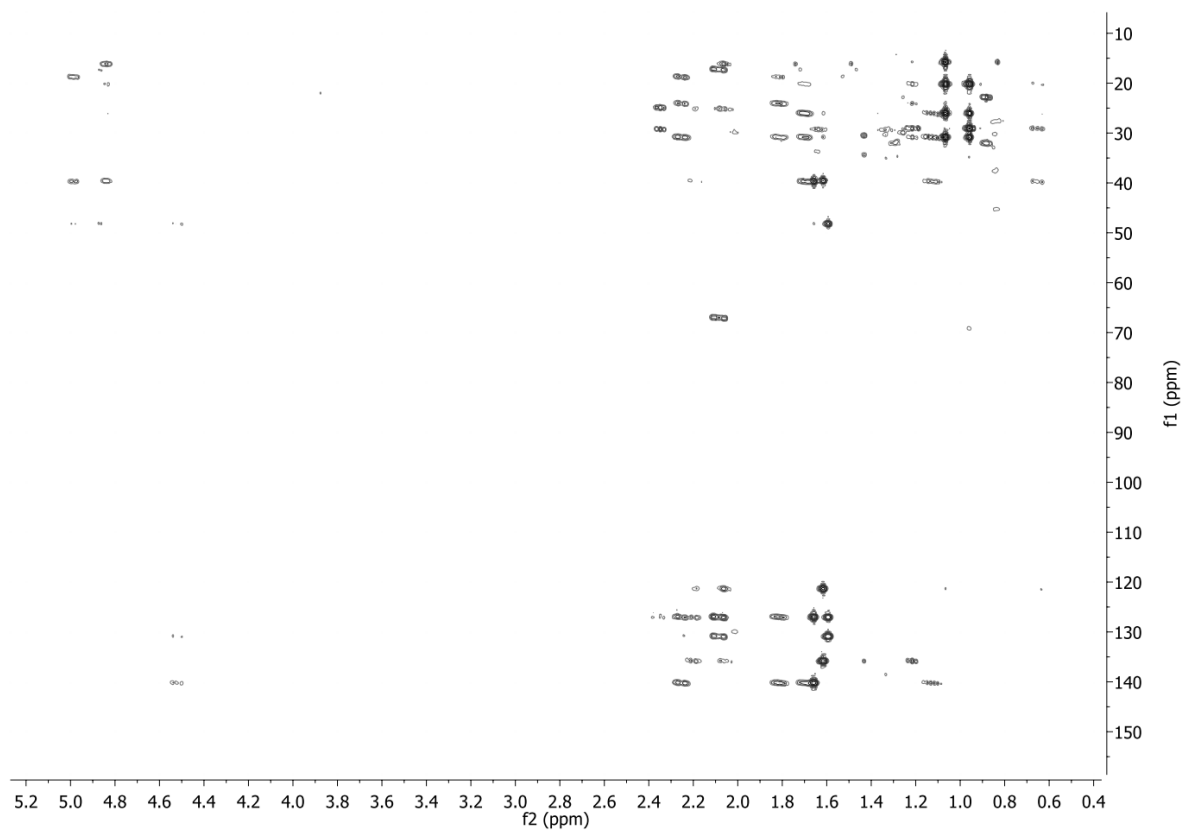

**Figure S8g.** NOESY NMR (500 MHz, CDCl<sub>3</sub>) of sinularcasbane D.

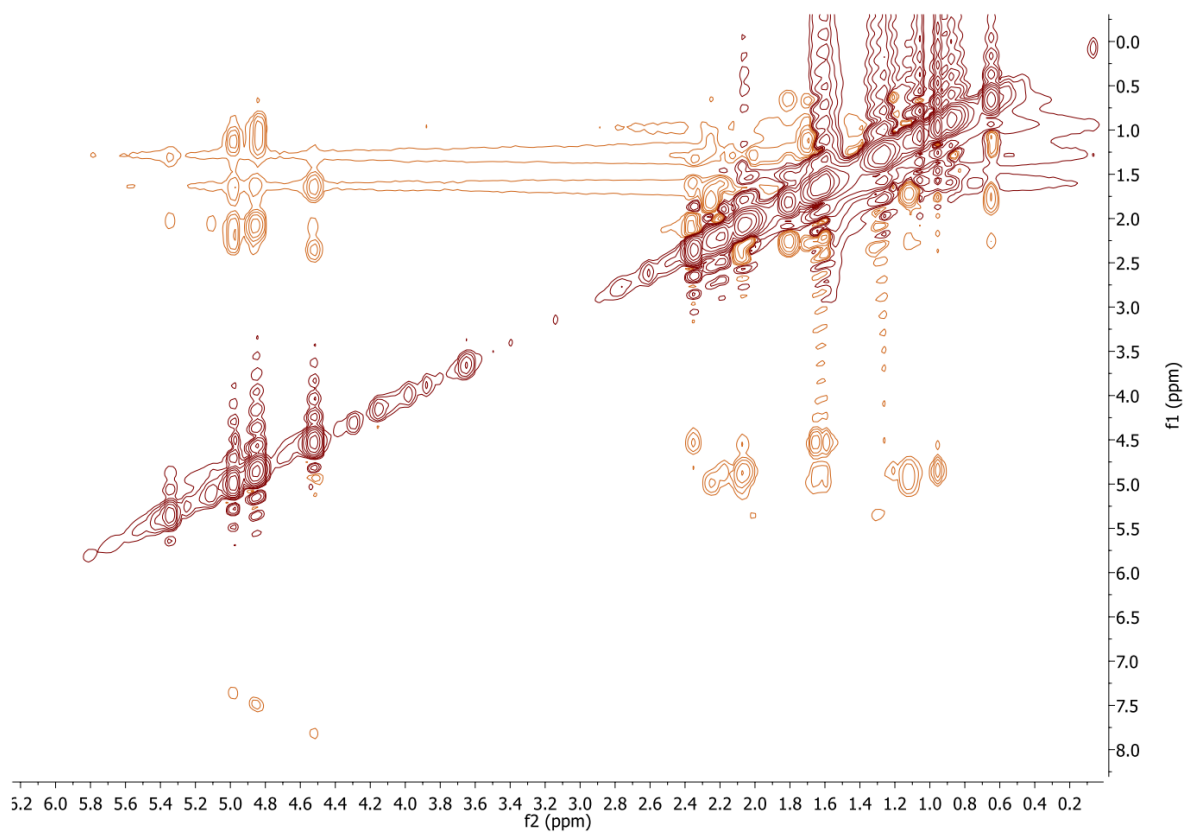

## 4. CD-Spectroscopy

**Figure S9.** Circular dichroism spectroscopy of cyclooctat-9-en-7-ol (**a**), cyclooctat-9-en-5,7-diol (**b**), cyclooctatin (**c**).

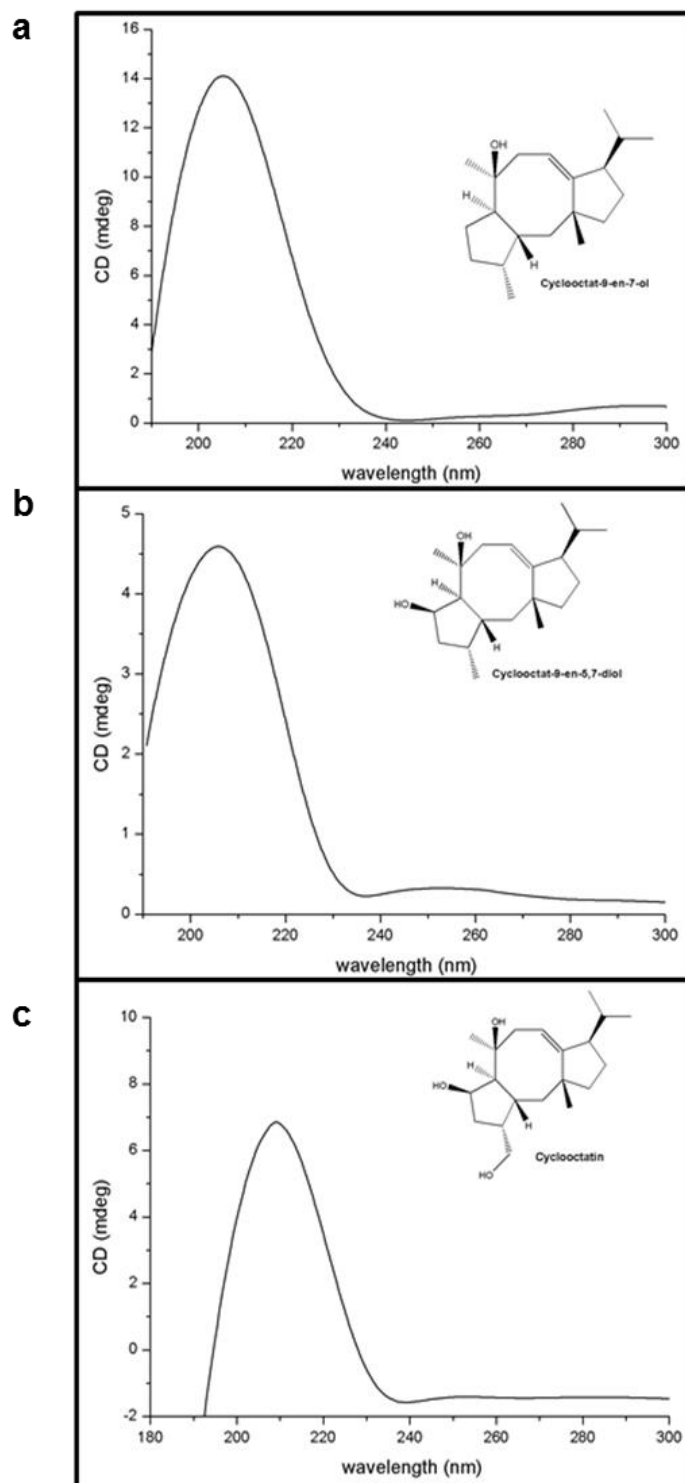

## 5. Mass spectrometry

**Figure S10a.** Mass spectrum of silylated cyclooctat-9-en-7-ol (RT: 21:16), recorded on a Trace GC Ultra with DSQII (Thermo Scientific),  $m/z$  was analyzed from [50-650].  $m/z$   $C_{23}H_{42}OSi$  calculated. 362.30.

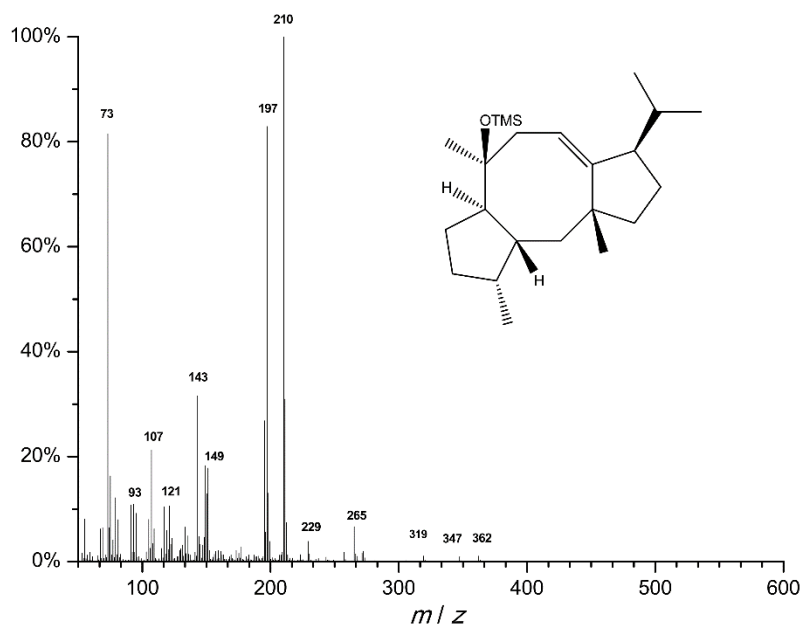

**Figure S10b.** Mass spectrum of silylated cyclooctat-9-en-5,7-diol (RT: 22:94), recorded on a Trace GC Ultra with DSQII (Thermo Scientific),  $m/z$  was analyzed from [50-650].  $m/z$   $C_{26}H_{50}O_2Si_2$  calculated 450.33.

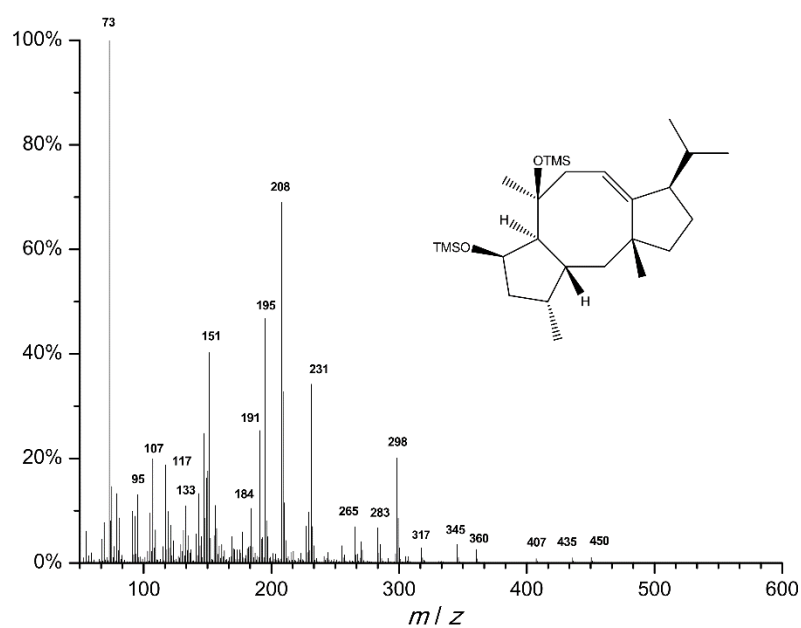

**Figure S10c.** Mass spectrum of silylated cyclooctatin (RT: 24:40), recorded on a Trace GC Ultra with DSQII (Thermo Scientific),  $m/z$  was analyzed from [50-650].  $m/z$   $C_{28}H_{56}O_3Si_3$  calculated 524.35.

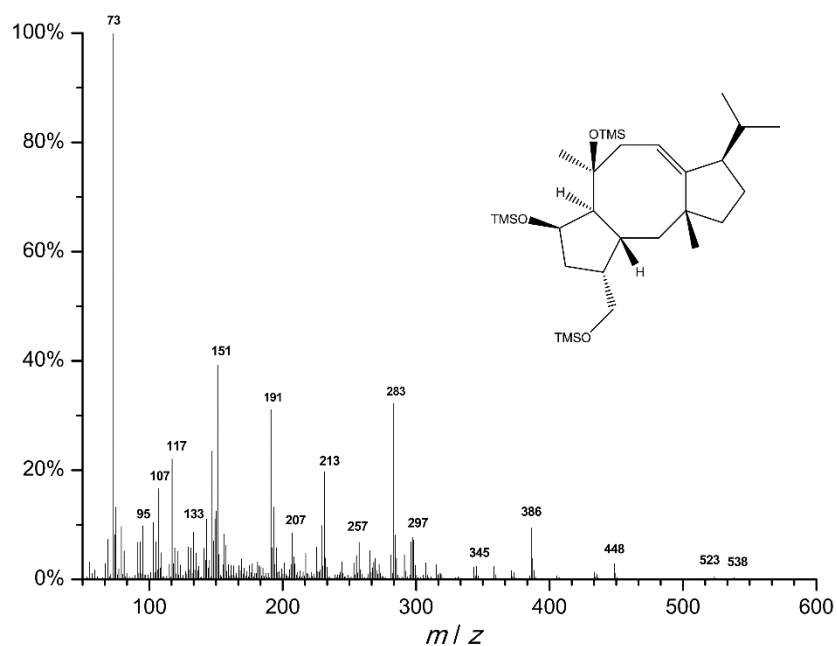

**Figure S10f.** Mass spectrum of sinularcasbane D (RT: 21:89), recorded on a Trace GC Ultra with DSQII (Thermo Scientific),  $m/z$  was analyzed from [50-650].  $m/z$   $C_{20}H_{32}O$  calculated 288.24.

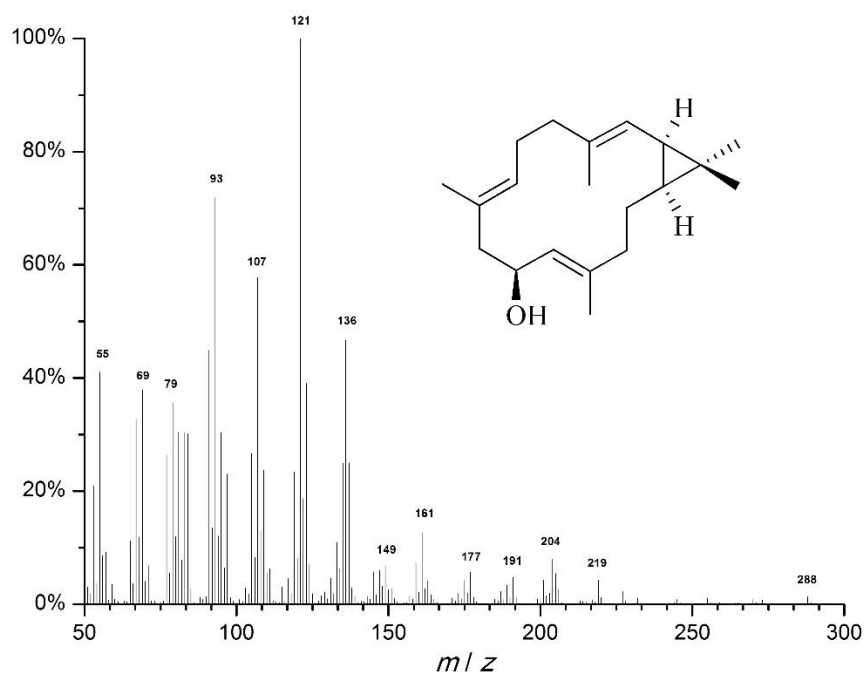

**Figure S11.** High resolution electron spray ionization of cyclooctat-9-en-7-ol (a)  $m/z$   $[[M-H_2O]^+$  272.2568 calculated  $C_{20}H_{32}$  272.2504, cyclooctat-9-en-5,7-diol (b)  $m/z$   $[[M-H_2O]^+$  272.2450 calculated  $C_{20}H_{32}O$  288.2453, cyclooctatin (c)  $m/z$   $[[M-H_2O]^+$  304.2415 calculated  $C_{20}H_{32}O_2$  304.2402.

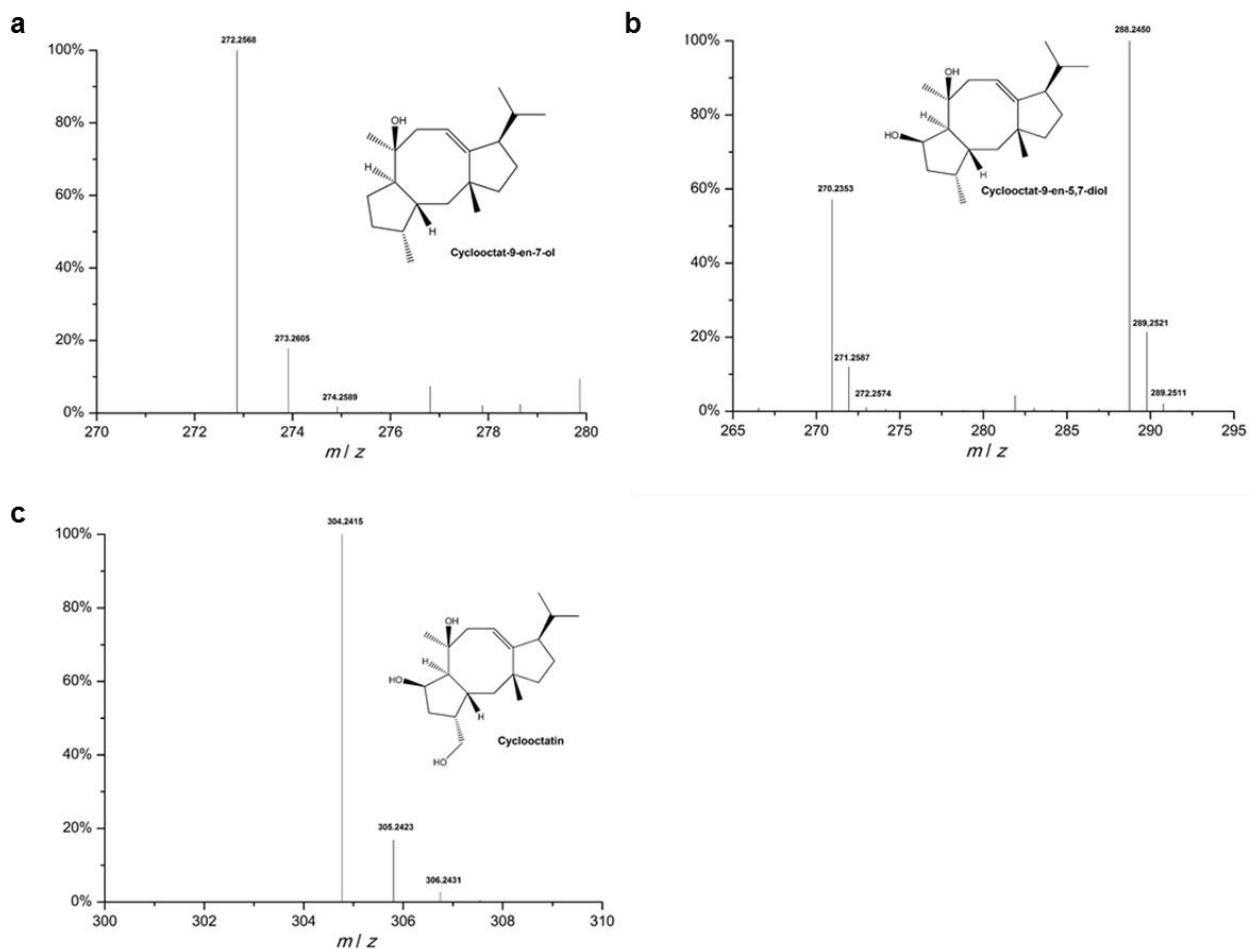

**Figure S12.** GC-MS spectra of a 72h shake flask culture of (-)-casbene and hydroxylation to sinularcasbane D by CotB3 on a Trace GC Ultra with DSQII (Thermo Scientific). 20 % of (-)-casbene were hydroxylated to sinularcasbane D.

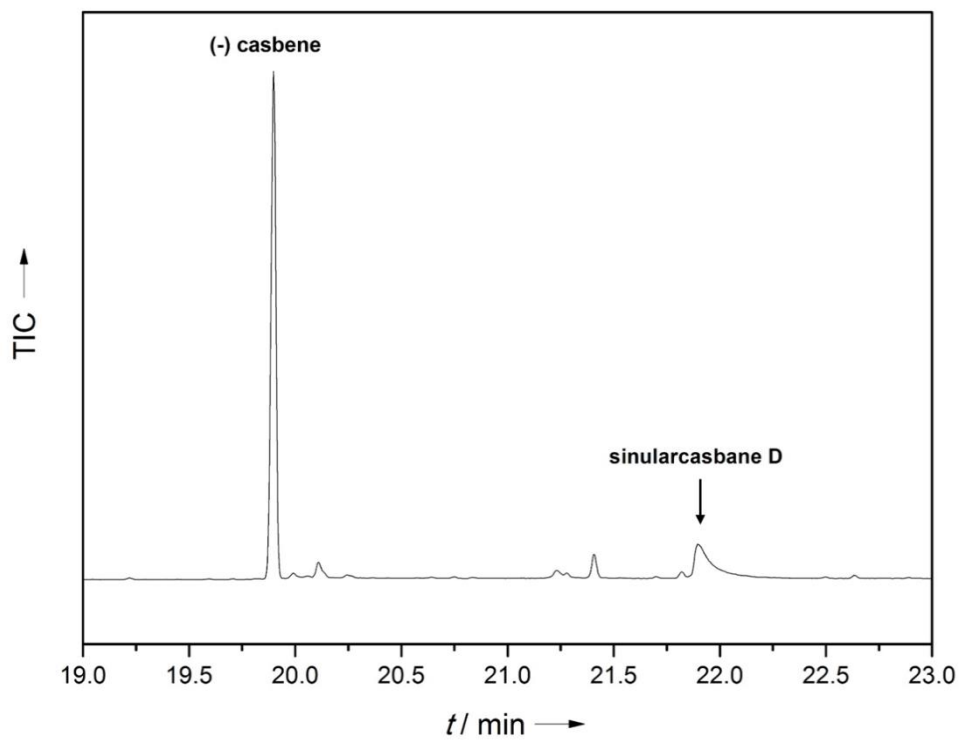

## 6. Genes

**Figure S13.** Gene of 1-deoxy-D-xylulose 5-phosphate synthase (dxs).

CCATGGATGAGTTTTGATATTGCCAAATACCCGACCCTGGCACTGGTTCGACTCCACCCAGGAGTT  
ACGACTGTTGCCGAAAGAGAGTTTTACCGAAACTCTGCGACGAACTGCGCCGCTATTTACTCGACA  
GCGTGAGCCGTTCCAGCGGGCACTTCGCCTCCGGGCTGGGCACGGTCGAACTGACCGTGGCGC  
TGCACTATGTCTACAACACCCCGTTTTGACCAATTGATTTGGGATGTGGGGCATCAGGCTTATCCG  
CATAAAATTTTGACCGGACGCCGCGACAAAATCGGCACCATCCGTCAGAAAGGCGGCCTGCACC  
CGTTCCCGTGGCGCGGCGAAAGCGAATATGACGTATTAAGCGTCGGGCATTCATCAACCTCCAT  
CAGTGCCGGAATTGGTATTGCGGTTGCTGCCGAGAAAGAAGGCAAAAATCGCCGCACCGTCTGT  
GTCATTGGCGATGGCGCGATTACCGCTGGCATGGCGTTTGAAGCGATGAATCACGCGGGCGATA  
TCCGTCCTGATATGCTGGTGGTCCTCAACGACAATGAAATGTCGATTTCCGAAAATGTCGGCGCG  
CTCAATAACCATCTGGCACAGCTGCTTCCGGTAAGCTTTACTCTTCGCTGCGCGAAGGCGGGAA  
AAAAGTTTTCTCTGGCGTTCCGCCAATTAAGAGCTGCTCAAACGTACCGAAGAACATATTAAGG  
CATGGTAGTGCTGGCACGTTGTTTGAAGAGCTGGGCTTTAACTACATCGGCCCGGTTGACGGT  
CACGATGTGCTGGGGCTTATCACCACGCTGAAGAACATGCGCGACCTGAAAGGCCCGCAGTTCC  
TGCATATCATGACCAAAAAAGGTCGTGGTTATGAACCGGCAGAAAAAGACCCCATCACTTTCCAC  
GCCGTGCCTAAATTTGATCCCTCAGCGGTTGTTTGCCGAAAAGTAGCGGCGGTTTGCCGAGCT  
ATTCAAAATCTTTGGCGACTGGTTGTGCGAAACGGCAGCGAAAGACAACAAGCTGATGGCGATT  
ACTCCGGCGATGCGTGAAGGTTCCGGCATGGTCGAGTTTTACGTAATTCCCGGATCGTTACTT  
CGACGTGGCAATCGCCGAGCAACACGCGGTGACCTTTGCCGCCGGTCTGGCGATTGGTGGGTA  
CAAACCCATTGTCGCGATTTACTCCACTTTCCTGCAACGCGCCTATGATCAGGTGCTGCATGACG  
TGGCGATTCAAAGCTCCCGTCTGTTCCGCATCGACCGCGCGGGCATTGTTGGTGTGACGG  
TCAAACCCATCAGGGCGCTTTTGACCTCTTTACCTGCGCTGTATACCGGAAATGGTCATTATGA  
CCCCGAGCGATGAAAACGAATGTCGCCAGATGCTCTATACCGGCTATCACTATAACGACGGCCC  
GTCCGCGGTGCGCTACCCGCGCGGTAACGCGGTTGGCGTGGAAGTACGCGCGCTGGAAAACT  
GCCAATTGGCAAAGGCATTGTGAAGCGTCGTGGCGAGAACTGGCGATCCTTAACTTTGGTACG  
CTGATGCCAGACGCGGCGAAAGTCGCTGAATCGCTGAACGCTACGCTGGTCGATATGCGTTTTG  
TGAAACCGCTTGATGAAGCGTTAATTCTGGAAATGGCCGCCAGCCATGAAGCGCTGGTCACCGT  
AGAAGAAAACGCCATTATGGGCGGCGCAGGCAGCGGCGTGAACGAAGTGCTAATGGCCCATCG  
TAAACCAGTACCCGTGCTGAACATTGGCCTGCCTGACTTCTTTATTCCACAAGGAACTCAGGAAG  
AAATGCGCGCCGAACTCGGCCTCGATGCCGCGGTATGGAAGCCAAAATCAAGGCCTGGCTGG  
CATAAGAATTC



**Figure S14.** Gene of 1-deoxy-D-xylulose 5-phosphate reductoisomerase (*dxp*).

CATATGAAGCAACTCACCATTCTGGGCTCGACCGGCTCGATTGGTTGCAGCACGCTGGACGTGG  
TGCGCCATAATCCCGAACACTTCCGCGTAGTTGCGCTGGTGGCAGGCAAAAATGTCACTCGCAT  
GGTAGAACAGTGCCTGGAATTCTCTCCCGCTATGCCGTAATGGACGATGAAGCGAGTGGAAA  
CTTCTTAAAACGATGCTACAGCAACAGGGTAGCCGCACCGAAGTCTTAAGTGGGCAACAAGCCG  
CTTGCGATATGGCAGCGCTTGAGGATGTTGATCAGGTGATGGCAGCCATTGTTGGCGCTGCTGG  
GCTGTTACCTACGCTTGCTGCGATCCGCGCGGGTAAAACCATTTTGCTGGCCAATAAAGAATCAC  
TGGTTACCTGCGGACGTCTGTTTATGGACGCCGTAAAGCAGAGCAAAGCGCAATTGTTACCGGT  
CGATAGCGAACATAACGCCATTTTTCAGAGTTTACCGCAACCTATCCAGCATAATCTGGGATACG  
CTGACCTTGAGCAAAATGGCGTGGTGTCCATTTTACTTACCGGGTCTGGTGGCCCTTTCCGTGAG  
ACGCCATTGCGCGATTTGGCAACAATGACGCCGGATCAAGCCTGCCGTCATCCGAACTGGTCGA  
TGGGGCGTAAAATTTCTGTCGATTCCGGCTACCATGATGAACAAAGGTCTGGAATACATTGAAGCG  
CGTTGGCTGTTTAAACGCCAGCGCCAGCCAGATGGAAGTGTGATTACCCCGCAGTCAGTGATTC  
ACTCAATGGTGCCTATCAGGACGGCAGTGTTCTGGCGCAGCTGGGGGAACCGGATATGCGTAC  
GCCAATTGCCACACCATGGCATGGCCGAATCGCGTGAACCTCTGGCGTGAAGCCGCTCGATTTT  
TGCAAATAAGTGCCTTGACATTTGCCGCACCGGATTATGATCGTTATCCATGCCTGAAACTGGC  
GATGGAGGCGTTTGAACAAGGCCAGGCAGCGACGACAGCATTGAATGCCGCAAACGAAATCACC  
GTTGCTGCTTTTCTTGCGCAACAAATCCGCTTTACGGATATCGCTGCGTTGAATTTATCCGTA  
GAAAAATGGATATGCGCGAACCAACAATGTGTGGACGATGTGTTATCTGTTGATGCGAACGCGCG  
TGAAGTCGCCAGAAAAGAGGTGATGCGTCTCGCAAGCTGACTCGAG

**Figure S15.** Bi-cistronic operon of 2-C-methyl-D-erythriol 4-phosphate cytidyltransferase synthase (*ispD*) 2-C-methyl-D-erythritol 2,4-cyclodiphosphate synthase (*ispF*).

CCATGGATGGCAACCACTCATTGGATGTTTGGCCGCGTGGTTCCGGCGGCCGGATTTGGCCGTC  
GAATGCAAACGGAATGTCCTAAGCAATATCTCTCAATCGGTAATCAAACCATTCTTGAACACTCGG  
TGCATGCGCTGCTGGCGCATCCCCGGGTGAAACGTGTCGTCATTGCCATAAGTCCTGGCGATAG  
CCGTTTTGCACAACCTTCTCTGGCGAATCATCCGCAAATCACCGTTGTAGATGGCGGTGATGAGC  
GTGCCGATTCCGTGCTGGCAGGTTTAAAGCCGCTGGCGACGCGCAGTGGGTATTGGTGCATG  
ACGCCGCTCGTCCTTGTCTGCATCAGGATGACCTCGCGCGATTGTTGGCGTTGAGCGAAACCAG  
CCGCACGGGAGGGATCCTAGCCGCACCAGTGCGCGATACGATGAAACGTGCCGAACCGGGCAA  
AAATGCCATTGCTCATACCGTTGATCGCAACGGCTTATGGCACGCGCTGACGCCGCAATTTTTCC  
CTCGTGAGCTGTTACATGACTGTCTGACGCGCGCTCTAAATGAAGGCGCGACTATTACCGACGAA  
GCCTCGGCGCTGGAATATTGCGGATTCCATCCTCAGTTGGTTCGAAGGCCGTGCGGATAACATTA  
AAGTCACGCGCCCGGAAGATTTGGCACTGGCCGAGTTTTACCTCACCCGAACCATCCATCAGGA  
GAATACATAAGCAGGAGCAGGAGCAGAAGGAGGAGCAGGAATGCGAATTGGACACGGTTTTGAC  
GTACATGCCTTTGGCGGTGAAGGCCCAATTATCATTGGTGGCGTACGCATTCTTACGAAAAAGG  
ATTGCTGGCGCATTCTGATGGCGACGTGGCGCTCCATGCGTTGACCGATGCATTGCTTGGCGCG  
GCGGCGCTGGGGGATATCGGCAAGCTGTTCCCGGATACCGATCCGGCATTAAAGGTGCCGAC  
AGCCGCGAGCTGCTACGCGAAGCCTGGCGTCGTATTACGGCGAAGGGTTATACCCTGGGCAAC  
GTCGATGTCATCATCGCTCAGGCACCGAAGATGTTGCCGCACATTCCACAAATGCGCGTATT  
TATTGCCGAAGATCTCGGCTGCCATATGGATGATGTTAACGTGAAAGCCACTACTACGGAAAAAC  
TTGGATTTACCGGACGTGGGGAAGGGATTGCCTGTGAAGCGGTGGCGCTACTCATTAAAGGCAAC  
AAAATGAGAATTC

**Figure S16.** Gene of Isopentenyl-diphosphate delta isomerase (*idi*).

CATATGCAAACGGAACACGTCATTTTTATTGAATGCACAGGGAGTTCCACGGGTACGCTGGAAAA  
GTATGCCGCACACACGGCAGACACCCGCTTACATCTCGCGTTCTCCAGTTGGCTGTTTAAATGCCA  
AAGGACAATTATTAGTTACCCGCCGCGCACTGAGCAAAAAAGCATGGCCTGGCGTGTGGACTAA  
CTCGGTTTTGTGGGCACCCACAACCTGGGAGAAAGCAACGAAGACGCAGTATCCGCCGTTGCCGT  
TATGAGCTTGGCGTGGAAATTACGCCTCCTGAATCTATCTATCCTGACTTTTCGCTACCGCGCCAC  
CGATCCGAGTGGCATTGTGAAAAATGAAGTGTGTCCGGTATTTGCCGCACGCACCACTAGTGCG  
TTACAGATCAATGATGATGAAGTGTGGATTATCAATGGTGTGATTTAGCAGATGTATTACCGGT  
ATTGATGCCACGCCGTGGGCGTTTCAGTCCGTGGATGGTGTGATGCAGGCGACAAATCGCGAAGCCA  
GAAAACGATTATCTGCATTTACCCAGCTTAAATAACTCGAG

**Figure S17.** Gene of *cotB2*.

CATATGACCACCGGTCTGAGCACCGCAGGCGCACAGGATATTGGTCGTAGCAGCGTTTCGT  
CCGTATCTGGAAGAATGTACCCGTCGTTTTCAAGAAATGTTTGATCGTCATGTTGTTACC  
CGTCCGACCAAAGTTGAACTGACCGATGCAGAACTGCGTGAAGTTATTGATGATTGTAAT  
GCAGCAGTTGCACCGCTGGGTAAAACCGTTAGTGATGAACGTTGGATTAGCTATGTTGGT  
GTTGTTCTGTGGTACACAGAGTCCGCGTCATATTAAGATATGGAAGCATTAAAGCCGTG  
TTCGTTCTGAATTGTGTTACCTTTGTTGGGATGATATGGACCCTGCACTGCATGATTTT  
GGTCTGTTTCTGCCTCAGCTGCGTAAAATTTGCGAAAAATACTATGGTCCGGAAGATGCC  
GAAGTTGCCTATGAAGCAGCACGTGCATTTGTTACCAGCGATCACATGTTTCGTGATAGC  
CCGATTAAGCAGCACTGTGTACCACCAGTCCGGAACAGTATTTTCGTTTTCGTGTTACC  
GATATTGGCGTGGATTTTTGGATGAAAATGAGCTATCCGATTTATCGCCATCCGGAATTT  
ACCGAACATGCAAAAACCGCCTGGCAGCACGTATGACCACCCGTGGTCTGACCATTGTT  
AATGATTTCTATAGCTATGATCGCGAAGTTAGCCTGGGTCAGATTACCAATTGTTTTCGT  
CTGTGTGATGTGAGTGATGAAACCGCCTTTAAAGAATTTTTTCAGGCACGTCTGGATGAC  
ATGATCGAAGATATTGAATGCATCAAAGCGTTTGATCAGCTGACACAGGATGTTTTTCTG  
GATCTGATTTATGGCAATTTTGTGTGGACCACCTCCAACAAACGTTATAAAACCGCAGTG  
AATGATGTGAACAGCCGTATTCAATAACTCGAG

**Figure S18.** Bi-cistronic *cotB3/cotB4* operon.

CATATGCGTGAACGTGGTCCGGTTACACCGGCAAAAAGCAGCGCACCGCCTGAACGTCCG  
TGGACCACCGGTACAGCACCGGGTAGCGTTCGGCTGCTGGGTCATACAATGGCACTGTGG  
CGTCGTCCGCTGCAATTTCTGGCAAGCCTGCCTGCACATGGTGATCTGGTTGAAGTTCGT  
CTGGGTCCGAGCCGTGCATATCTGGCATGTCATCCGGAACCTGGTTCGTCAGGTTCTGCTG  
AATCCGCGTGTTTTGATAAAGGTGGCGTTTTCGATAAAGCACGTCAGCTGCTGGGCAAT  
AGCCTGAGCGTTAGCCGTGGTGAAGATCATCGTTATCAGCGTCGTATGATTCAGCCTGCA  
TTTTATACCCCGAAAATTGCCGCATATACCGCAGCAGTTGCAGATGATACCCGTGCAGCA  
ATTGGTAGCTGGGAACCGGGTCGTACCCTGGATATTAGCGATAACCATGCATGCACTGCTG  
ATGCGTGTTGCAGCAGCTACCCTGTTTAGCACCGGTATTGATGAAGCAACCATCGATGAA  
GCCCCGTCATTGTCTGCGTATTGTTAGTGATGGTATCTATAAACGTACGATGGCACCGCTG  
GGTATTATGAAAAACTGCCGACACCGGGTAATCGTCGTTATGATCGTGCAAATGCACGT  
CTGCGTCAGATTGTTGATGAAATGATTTCGTGAACGTCGTCGTAGCGGTGCAGATCATGGC  
GATCTGCTGAGCACCTGCTGCGTGCAGAACATCCGGAAACCGGTAAAGGTCTGGATGAT  
GGTGAAGTTCGGATCAGGTTGTTACCTTTCTGGTTGCAGGTAGCGAAACCACCGCAAGC  
ACCCTGGCATTGTTTTTCATCTGCTGGGTGCCCATCCGGAAGTTGAAAAACGTGTTTCAT  
GCAGAAATCGATGAAATTCTGGAAGGTGCTAGCCCGACCTTTGAAGATCTGCCGAGCCTG  
GAATATACCCGTGGTGTTATTACCGAAAGCCTGCGTCTGTATCCGCCTAGCTGGATGGCA  
ATGCGTGTTACCGCAGCCGAAACCGAACTGGGTGGTTCGTACCCTCCGGCAGGCACCATG  
ATTCTGTATAGCGCACAGGCACTGCATCATAACCCGGAACCTGTTTCCAGATCCGGAACGT  
TTTGATCCTGAACGTTGGCTGGGTGATCGTGCCAAAGAAGTTGAACGCGGAGCACTGCTG  
CCGTTTGGTGCCGGTAGCCATAAATGTATTGGTGATGTGCTGGCACTGACCGAAACAGCA  
CTGATTGTTGCAACCATTGCAAGCCGTTGGCGTCTGCGTCCGGTCCGGGTACAACCCTG  
CGTCTGAACCGAAAAGCAACCCTGGAACCTGGTCCGCTGCCGATGGTTTGTGAACCGCGT  
TAACTAGTAGGAGGAAAACATCATGAAAGATTTTTTCGTATGCGCACCGCACAGCAGCC  
TGCCACACGTCATTGGCGTCATACCGTTGCACCGGGTGGTCTGCCGCTGGCAGGTCACGC  
TCTGCTGATGGCACGTAAACCTCTGCAATTCCTGGCCTCACTGCCAGCCCACGGCGATCT  
GGTGGAACCTGCGCCTGGGACCGCGTCCGGTGTATCTGCCGTGCCACCCTGAACTGGTGCA  
GCAGGTAAGTAAATGCACGTGTTTATGATACAGGCGGTCCGGTGAAGAAAAAGCAAA  
ACCGATTCTGGTAATGGTCTGATTACCAGCGATTGGGCTGATCATCGTCGCCAGCGTCG  
CCTGTTTACGCCAGCCTTTACACCCGCAGTATTGCAAAGTATGCCGAAGTTATGGAACG  
TGAATGTGAAGCAGAAAGCACCGCATGGACCGCACGTCGTCGATTGATGTTAGCCATGA  
AATGCTGGCCCTGACAGCACGCGTTACCGCACGTCGACTGTTTTCAACCGATATGGCTCC  
GCATGCCGTTGCAGAAATTCAGCATTGCCTGCCGATTGTTGTTGAAGGTGCATATCGTCA  
GGCAATTGATCCGACCGGTCTGCTGGCCAAACTGCCTCTGGCAGCAAATCGTCGCTTTGA  
TGATGCACTGGCACGTCTGAACCAGCTGATTGATCGCATGATTGATGATTACAAAGCCAG  
TGATGATGGCGATCGTGGTGATGTTCTGAGCGCACTGTTTGCAGCACAGGATGATGAAAC  
CGGTGGTACAATGAGCGATCAAGAAATTCATGATCAGGTTATGACACTGCTGCTGGCTGG  
TATTGAAACCACAGCCAGCGCACTGACCTGGGCATGGTTTCTGCTGGGACGTAATCCGGG  
TGCGGAAGCAGCACTGCATGCGGAAGTGGATGAAGTGTGCTGGGTGGCCGTGCACCGCGTTA  
TGCAGATGTTCCGCGTCTGGCATATACACAGCGTGTGTTTAGCGAAGCCCTGCGCCTGTT  
TCCTCCGGCATGGCTGTTTACCCGTACCACCACCGAAACCACGGAACCTGGGAGGCCGTCG  
TCTGCCTCCGGCTTCAGATGTGCTGATTAGCCCGTATGTGCTGCATCGTATCCAGCACT  
GTTTCCGCGTCTGATAGCTTTGACCCGGATCGTTGGCTGCCAGAACCGCGCAAAAAGAAGT  
AACACGCGGTAGCTATCTGCCTTTTGGTGGTGGTTCACGTAATGCATTGGCGACGTTTT  
TGGTATGACCGAAGCAAACTGGCACTGGCAGCGATTGCCGGTCTGTTGGCGGATGCGTCC  
TATTCTGGCACCAAAATTCGTCCGCGTCCGCAGATGAGCCTGACCGCAGGTCTCTGCG  
CATGATTCCGGAACCTCGTTAACTCGAG

**Figure S19.** Bi-cistronic *afR/afx* operon.

CCATGGGCCCTGCAAATGATGCCTGTGTTATTGTTGGTGCAGGTCTGGCAGGCGCAAAG  
CAGCACAGGCACTGCGTGAAGAGGGTTTTGATGGTCCGCTGGTTCTGATTGGTGAAC  
GTGAACGTCCGTATGAACGTCCTCCGCTGAGCAAAGGTTATCTGACCGGTAAAGATGCAC  
GTGAGCAGATTTATGTTTCATCCGCCTCAGTGGTATGCAGAACATAATGTTGATATGCGTC  
TGGGTATGGCAGTTACCGCAGTTGATCCGGCAGCACGTGAAATGACCCTGGATGATGGTA  
GCCGTGTTGGTTATGGTAAACTGCTGCTGACCACCGGTAGCGCACCGCGTCGTCTGCCGG  
TTCCTGGTGCTGGCCTGGAACGTGTTCTGTATCTGCGTCGTGTTGAAGATAGCGATCAGA  
TTAAAGAAGCATTTCAGAGCGCAAGCCGTGCAGTTGTTATTGGTGCCGGTTGGATTGGTC  
TGAAACCACCGCAGCAGCACGTACCGCAGGCGTTGAAGTTACCGTTCTGGAAATGGCAG  
AACTGCCGCTGCTGCGTGTCTGGGTGCTGAAGTTGCACAGCTGTTTGCAAATCTGCATC  
GTGATCATGGTGTGATCTGCGTTTTGGTGCACAGGTTGCAGAAATTACCGGTAGTGGTG  
GTGCAGTTGATGGTGTTCGTCTGAGTGATGGCACCCGTATTGATGCAGATGTTGTGATTG  
TGGGTGTTGGCATTAAACCGAATATTGGCCTGGCACAAGAAGCCGGTCTGGAAGTTGATA  
ATGGTATTCGTGTGGATGAACGTCTGCGTACCAGCTATCCTGATATTTATGCAGCCGGTG  
ATGTTGCACATGCATTTTCATCCGCTGCTGGGTAAACATATTCGCGTTGAACATTGGGCAA  
ATGCACTGAATCAGCCGCAGATTGCAGCAAAGCAATGCTGGGTCCGGAAGATGCCGTTT  
ATGATCGTATTCCGTATTTTTTACCAGATCAGTATGATCTGGGCATGGAATATGCAGGTT  
ATGTTGAACCGGGTGGTTATGATCAGGTTGTTTTTCTGGTGATGTGGCAGGTCGTGAAT  
TTATTGCATTTTGGCTGGCAGGCAATCGTGTGCTGGCAGGTATGAATGTGAATATTTGGG  
ATGTTAATGATCAGCTGCAGACCCTGGTTCGTACCGCACAGACCGTTGATATTCCGATGC  
TGACCGATCCGCAGGTTCCGCTGGGTAGCCTGCTGCCTGATCCTCAGCATCGTTAATATA  
TTAGTTAAGTATAAGAAGGAGATATAATGCCGAAAGTTACCTATGTTAGTGATGCCGGTG  
AAGTTCGTGTTGTTGATGGTCTGGTTGGTGATAGCGTTATGCAGACCGCAGTTCGTAATG  
GTGTTCCGGGTATTACCGGTGAATGTGGTGGTGTCTGAGCTGTGCAACCTGTCATGTTT  
TTGTTGATGAAGCAGATCTGGATCGTCTGGAACCGGTTAGCGGTCTGGAAGATGAAATGC  
TGGATGGCACCGTTGTTGATCGTTGTCCGAATAGCCGTCTGAGCTGCCAGATTAAACTGA  
GCGAAGAACTGGGTGATCTGCGTGTACCACACCGGAAGCACAAAGAATAAGCGGCCGC

**Figure S20.** Bi-cistronic *pdR/pdx* operon.

CCATGGGCAACGCCAATGATAATGTTGTTATTGTTGGCACCGGTCTGGCAGGCGTTGAAGTTGCA  
TTTGGTCTGCGTGCAAGCGGTTGGGAAGGTAATATTCGTCTGGTTGGTGATGCAACCGTTATTCC  
GCATCATCTGCCTCCGCTGAGCAAAGCATATCTGGCAGGTAAAGCAACCGCAGAAAGCCTGTAT  
CTGCGTACACCGGATGCCTATGCAGCACAGAATATTCAGCTGCTGGGTGGTACACAGGTTACCG  
CAATTAATCGTGATCGTCAGCAGGTTATTCTGAGTGATGGTCGTGCACTGGATTATGATCGTCTG  
GTGCTGGCAACCGGTGGTCGTCCGCGTCCGCTGCCGTTGCAAGTGGTGCAGTTGGTAAAGCC  
AATAACTTTTCGTTATCTGCGCACCCCTGGAAGATGCAGAATGTATTCGTCTGTCAGCTGATTGCAGAT  
AATCGCCTGGTTGTGATTGGTGGTGGTTATATTGGTCTGGAAGTTGCAGCAACCGCCATTAAGC  
AAATATGCATGTTACCCTGCTGGATACCGCAGCACGTGTTCTGGAACGTGTTACCGCACCGCCTG  
TTAGCGCCTTTTATGAACATCTGCATCGTGAAGCCGGTGTGATATTCGTACCGGCACCCAGGTT  
TGTGGTTTTGAAATGAGCACCGATCAGCAGAAAGTTACCGCAGTTCTGTGTGAAGATGGCACCCG  
TCTGCCTGCAGATCTGGTTATTGCAGGTATTGGCCTGATTCCGAATTGTGAAGTGGCAAGCGCAG  
CAGGTCTGCAGGTTGATAATGGTATTGTTATTAACGAACACATGCAGACCAGCGATCCGCTGATT  
ATGGCAGTTGGTGATTGTGCACGTTTTTCATAGCCAGCTGTATGATCGTTGGGTTTCGTATTGAAAG  
CGTTCCGAATGCACTGGAACAGGCACGTAAAATTGCAGCAATTCTGTGTGGTAAAGTTCCGCGTG  
ATGAAGCAGCACCGTGGTTTTGGAGCGATCAGTATGAAATTGGTCTGAAAATGGTTGGTCTGAGC  
GAAGGTTATGATCGCATTATTGTTTCGTGGTAGCCTGGCACAGCCGGATTTTTTCAGTTTTTTATCTG  
CAGGGTGATCGTGTGCTGGCAGTTGATACCGTTAATCGTCCGGTTGAATTTAACCCAGAGCAAACA  
AATTATCACCGATCGTCTGCCGGTGGAAACCGAATCTGCTGGGAGATGAAAGCGTGCCGCTGAAA  
GAAATTATTGCAGCAGCAAAGCAGAACTGAGCAGCGCATAATATATTAGTTAAGTATAAGAAGGA  
GATATAATGAGCAAAGTTGTGTATGTTAGCCATGATGGCACCCGTCGTGAAGTGGATGTTGCAGA  
TGGTGTGAGCCTGATGCAGGCAGCAGTTAGCAATGGTATTTATGATATTGTTGGTATTGTGGTG  
GTAGCGCAAGCTGTGCAACCTGTCATGTTTATGTTAATGAAGCCTTCACCGATAAAGTTCCGGCA  
GCAAATGAACGTGAAATTGGTATGCTGGAATGTGTTACCGCAGAACTGAAACCGAATAGCCGCTCT  
GTGTTGTCAGATTATTATGACACCGGAACTGGACGGTATTGTTGTTGATGTTCCGGATCGTCAGT  
GGTAAGCGGCCGC

**Figure S21.**(-)-casbene synthase (*cs*) from *Jatropha curcas*.

CATATGGCAAGCACCAAAAGCGAAACCGAAGCACGTCCGCTGGCATATTTCCGCCTACCGTTTG  
GGGTGATCGTCTGGCAAGCCTGACCTTTAATCAGCCTGCATTTGAACTGCTGAGTAAACAGGTTG  
AGCTGCTGAACGAGAAAATCAAAAAAGAAATGCTGAATGTGAGCACCAGCGATCTGGCAGAAAA  
ATCATTCTGATTGATAGCCTGTGTCGTCTGGGTGTTAGCTATCATTTTGAAGAAGAAATCCAAGAA  
AACCTGACCCGCATCTTTAATACCCAGCCGAATTTTCTGAACGAAAAAGATTATGATTTATTCACC  
GTGGCCGTGATCTTTCGTGTTTTTCGTCAGCATGGCTTTAAAATCAGCAGCGACGTTTTTAACAAA  
TTCAAAGATAGCGACGGGAAATTCAAAGAAAGCCTGCTGAATGATATTAAGGCATCCTGAGCCT  
GTTTGAAGCAACCCATGTTAGCATGCCGAATGAACCGATTCTGGATGAAGCACTGGCATTACCA  
AAGCATTTCTGGAAAGCAGCGCAGTTAAATCCTTTCCGAATTTTGCCAAACATATTAGCAGCGCAC  
TGGAACAGCCGGTTCATAAAGGTATTCCGCGTCTGGAAGCACGCAAATATATCGATCTGTATGAA  
GTTGATGAAAGCCGCAATGAAACCGTGCTGGAAGTGGCGAAACTGGATTTTAATCGTGTTAGCT  
GCTGCATCAAGAAGAACTGAGCCAGTTTAGCAAATGGTGGAAAAGCCTGAATATTAGTGCCGAAG  
TTCCGTATGCACGTAATCGTATGGCAGAAATCTTTTTTTGGGCAGTGAGCATGTATTTTGAACCGC  
AGTATGCAAAAGCCCGTATGATTGTTAGCAAAGTGGTTCTGCTGATTAGCCTGATTGATGATACCA  
TTGATGCCTATGCCACCATCGATGAAATCCATCGTGTTGCAGATGCAATTGAACGTTGGGATATG  
CGTCTGGTTGATCAGCTGCCGAATTATATGAAAGTGATTTATCGCCTGATCATCAACACCTTTGAT  
GAGTTTAAAAAGATCTGGAAGCCGAGGGTAAAAGCTATAGCGTTAAATATGGTCGTGAAGCCTA  
TCAAGAAGTGGTGCGTGGTTATTACCTGGAAGCAATTTGGAAAGCGGATGGTAAAGTTCCGAGCT  
TCGATGAGTATATCTATAATGGTGGTGTACCACCGGTCTGCCGCTGGTTGCCACCGTTAGCTTT  
ATGGGTGTTAAAGAAATCAAAGGCACCAAAGCCTTTCAGTGGCTGAAAACCTATCCGAAACTGAA  
TCAGGCAGGCGGTGAATTTATTCGTCTGGTTAATGATGTTATGAGCCATGAAACCGAACAGGATC  
GTGGTCATGTTGCAAGCTGTATTGATTGCTATATGAAACAGTATGGCGTGAGCAAAGAAGAAGCC  
GTTGAAGAGATCCAGAAAATGGCAACCAATGAGTGGAAAAAACTGAACGAACAGCTGATTGTTCCG  
TAGCACCGAAGTTGTTCCGGTTAATCTGCTGATGCGTATTGTTAATCTGGTTCGTCTGACCGATGT  
GAGCTATAAATACGGTGATGGTTATACCGATAGCTCCCAGCTGAAAGAATATGTGAAAGGCCTGT  
TTATTGAACCGATCGCAACCGGTACCTCTTAACTCGAG

**Figure S22.** Taxadiene synthase (*txs*) from *Taxus brevifolia*.

CATATGGCAATGAGCAGCAGCACCGGCACCAGCAAAGTTGTTAGCGAAACCAGCAGTACCATTG  
TTGATGATATTCCGCGTCTGAGCGCAAATTATCATGGTGATCTGTGGCATCATAATGTGATTGAGA  
CCCTGGAAACCCCGTTTTCTGAAAGCAGCACCTATCAAGAACGTGCAGATGAACTGGTTGTGAAA  
ATCAAAGATATGTTAACGCACTGGGTGATGGTGATATTAGCCCGAGCGCCTATGATACCGCATG  
GGTTGCACGTCTGGCAACCATTAGCAGTGATGGTAGCGAAAAACCGGTTTTCCGCAGGCACTG  
AATTGGGTTTTTAAACAATCAGCTGCAGGATGGTAGTTGGGGTATTGAAAGCCATTTTAGCCTGTGT  
GATCGTCTGCTGAATACCACCAATAGCGTTATTGCACTGAGCGTTTGGAAAACCGGTCATAGCCA  
GGTTCAGCAGGGTGCAGAAATTTATTGCAGAAAATCTGCGCCTGCTGAATGAAGAAGATGAGCTGA  
GTCCGGATTTTCAGATTATCTTTCCGGCACTGCTGCAGAAAAGCAAAGCACTGGGTATTAATCTG  
CCGTATGATCTGCCGTTTATCAAATATCTGAGCACCAACCGTGAAGCACGTCTGACCGATGTTAG  
CGCAGCAGCAGATAATATCCGGCAAATATGCTGAATGCACTGGAAGGTCTGGAAGAAGTTATTG  
ACTGGAACAAAATTATGCGCTTCCAGAGCAAAGATGGTAGCTTTCTGAGTAGTCCGGCAAGCACC  
GCATGTGTTCTGATGAATACCGGTGATGAAAAATGCTTTACCTTCTGAATAACCTGCTGGATAAA  
TTTGGTGGTTGTGTTCCGTGTATGTATAGCATTGATCTGCTGGAACGTCTGAGCCTGGTTGATAAT  
ATTGAACATCTGGGTATTGGTCCGCACTTCAAACAAGAAATTAAGGTGCACTGGATTACGTGTAT  
CGTCATTGGAGCGAACGTGGTATTGGTTGGGGTTCGTGATAGCCTGGTTCCGGATCTGAATACAA  
CCGCACTGGGCCTGCGTACCCTGCGTATGCATGGTTATAATGTTAGCTCAGATGTGCTGAACAAC  
TTTAAAGATGAAAACGGTCGCTTTTTTAGCAGCGCAGGTCAGACCCATGTTGAACTGCGTAGCGT  
TGTTAACCTGTTTCGTGCAAGCGATCTGGCATTTCGGATGAACGTGCAATGGATGATGCACGTA  
AATTTGCAGAACCGTATCTGCGTGAAGCCCTGGCCACCAAATAGCACCAATACAAAATGTTTA  
AAGAAATCGAATATGTGGTCGAGTATCCGTGGCACATGAGCATTCTCGTCTGGAAGCACGTAGC  
TATATTGATAGCTATGATGATAACTATGTGTGGCAGCGTAAAACCTGTATCGTATGCCGAGCCTG  
AGCAATAGCAAATGTCTGGAACCTGGCAAACCTGGATTTAACATTGTTTCAGAGCCTGCACCAAGA  
AGAACTGAAACTGCTGACCCGTTGGTGGAAAGAAAGCGGTATGGCAGATATTAACCTTTACCCGTC  
ATCGTGTGCCGAAGTGTATTTTAGCAGTGCAACCTTTGAACCGGAATATAGCGCAACCCGTATT  
GCCTTTACCAAATTTGGTTGTCTGCAGGTCCTGTTTCGATGATATGGCCGATATTTTTGCAACCCTG  
GATGAACTGAAAAGTTTTACCGAAGGTGTTAAACGTTGGGATACCAGTCTGCTGCATGAAATCCC  
GGAATGTATGCAGACCTGTTTTAAAGTGTGGTTTTAACTGATGGAAGAGGTGAATAACGATGTGG  
TTAAAGTTCAGGGTCGCGATATGCTGGCCCATATTCGTAACCGTGGGAACCTGATTTCAACTGC  
TATGTTCAAGAACGCGAATGGCTGGAAGCCGGTTATATCCGACCTTTGAAGAATATCTGAAAAC  
CTATGCAATTAGCGTTGGTCTGGGTCCGTGTACCCTGCAGCCGATTCTGCTGATGGGTGAACTG  
GTGAAAGATGATGTTGTTGAGAAAGTTCATTACCCGAGCAACATGTTTGAACCTGGTAAGCCTGAG  
CTGGCGTCTGACCAATGATACCAAACCTATCAGGCAGAAAAAGCACGTGGTCAGCAGGCAAGC  
GGTATTGCATGTTATATGAAAGACAATCCGGGTGCAACCGAAGAGGATGCAATCAAACATATTTG  
TCGTGTTGTTGATCGTGCCTGAAAGAAGCCAGCTTTGAATATTTCAAACCGAGCAACGATATTC  
GATGGGCTGTAAATCCTTTATCTTTAATCTGCGTCTGTGCGTGCAGATCTTCTATAAATTCATTGAT  
GGTTACGGCATTGCCAACGAAGAGATCAAAGATTATATCCGCAAAGTGTATATCGATCCGATTCA  
GGTTAACTCGAG
